# Supplementary material for: Synthesis of a dendritic cell-targeted self-assembled polymeric nanoparticle for selective delivery of mRNA vaccines to elicit enhanced immune responses
Source: Royal Society of Chemistry journal article supplement (doi:10.1039/d3sc06575h), 2024-01-01
Supplement: d3sc06575h1.pdf [file d3sc06575h1.pdf]

## SUPPLEMENTARY INFORMATION

### **Synthesis of a Dendritic Cell-Targeted Self-Assembled Polymeric Nanoparticle for Selective Delivery of mRNA Vaccines to Elicit Enhanced Immune Responses**

Chen-Yo Fan,<sup>a</sup> Szu-Wen Wang,<sup>a</sup> Cinya Chung,<sup>a</sup> Jia-Yan Chen,<sup>a</sup> Chia-Yen Chang,<sup>a</sup> Yu-Chen Chen,<sup>a</sup> Tsui-Ling Hsu,<sup>a</sup> Ting-Jen R. Cheng,<sup>a</sup> and Chi-Huey Wong<sup>\*ab</sup>

<sup>a</sup>Genomics Research Center, Academia Sinica, Taipei 115, Taiwan

<sup>b</sup>Department of Chemistry, The Scripps Research Institute, La Jolla, CA 92037

Corresponding Author: Chi-Huey Wong

Email: wong@scripps.edu

#### **Table of contents**

Materials and Methods

Experimental Section

Scheme S1-S6

Synthesis of compound **2-54**

Figures S1-S23

<sup>1</sup>H and <sup>13</sup>C NMR of compound **2-54**

## Materials and Methods

For chemical synthesis, all starting materials and commercially obtained reagents were purchased from Sigma-Aldrich and used as received unless otherwise noted. All reactions were performed in oven-dried glassware under nitrogen atmosphere using dry solvents.  $^1\text{H}$  and  $^{13}\text{C}$  NMR spectra were recorded on Bruker AV-600 spectrometer, and were referenced to the solvent used ( $\text{CDCl}_3$  at  $\delta$  7.24 and 77.23,  $\text{CD}_3\text{OD}$  at  $\delta$  3.31 and 49.2, and  $\text{D}_2\text{O}$  at  $\delta$  4.80, and  $\text{DMSO-d}_6$  at  $\delta$  2.5 and 39.51 for  $^1\text{H}$  and  $^{13}\text{C}$ , respectively). Chemical shifts ( $\delta$ ) are reported in ppm using the following convention: chemical shift, multiplicity (s = singlet, d = doublet, t = triplet, q = quartet, m = multiplet), integration, and coupling constants ( $J$ ), with  $J$  reported in Hz. High-resolution mass spectra were recorded under ESI-TOF mass spectroscopy conditions. Silica gel (E, Merck) was used for flash chromatography. IMPACT™ system (Intein Mediated Purification with Affinity Chitinbinding Tag) was purchased from New England Biolabs. His-tag purification resin was purchased from Roche. HiTrap IMAC column (5 mL) was purchased from GE Healthcare Life Sciences. Gel permeation chromatography (GPC) equipped with Ultimate 3000 liquid chromatography associated with a 101 refractive index detector and Superdex 75 10/300 GL Cytiva column was used to analyze the polymeric products using 30% acetonitrile in 0.1 M acetate buffer (pH = 6.5) as the eluent at 30 °C with 0.4 mL min<sup>-1</sup> flow rate. The molecular weight standard samples somatostatin (1638 Da), thymosin  $\alpha$ 1 (3108 Da), recombinant human insulin (5808 Da), ribonuclease A (13700 Da) and  $\beta$ -lactoglobulin (35000 Da) were purchased from Sigma. The Mw and dispersity of the polymeric products were calculated by DIONEX chromeleon software. Transmission electron microscopy (TEM) images were obtained by a FEI Tecnai G2 F20 S-Twin.

## Experimental Section

### Cell cultures

Human Embryonic Kidney Cell 293 (HEK293T cell) was cultured in Dulbecco's modified Eagle's medium (DMEM) (Invitrogen, Carlsbad, CA, USA) supplemented with 10% fetal bovine serum (FBS) (Invitrogen) and 1% Gibco Antibiotic-Antimycotic (anti-anti) (Invitrogen).

### Animals

Balb/c mice (8 weeks) were purchased from National Laboratory Animal Center, Taiwan. All the mice were maintained in a specific pathogen-free environment. Eight-week-old Balb/c mice were immunized i.m. twice with 2-week interval. Each vaccination contains in PBS (100  $\mu$ l). Sera collected from immunized mice were subjected to ELISA analysis 10 days after the last immunization. The experimental

protocol was approved by Academia Sinica's Institutional Animal Care and Utilization Committee (approval no. 22-08-1901).

### **Antibodies and proteins**

The SARS-CoV-2 full-length spike protein was purchased from ACROBiosystems. HRP conjugated anti-mouse secondary antibody and horseradish peroxidase substrate were purchased from Thermo Scientific. Mouse monoclonal anti- $\beta$ -actin were purchased from Millipore. All commercial antibodies were validated for specificity by companies via Western blot.

### **Wild type (WT) spike DNA construction**

pMRNA<sup>XP</sup> mRNA Synthesis Vector was obtained from System Biosciences. WT (Wuhan/WH01/2019 strain) spike DNA sequence with K986P and K987P mutations (2P) was codon-optimized for homosapiens.<sup>1</sup> pMRNA<sup>XP</sup> vector was digested with EcoRI and BamHI at 37 °C for 1 hour. DNA sequence of the spike protein was amplified by KOD One<sup>TM</sup> PCR master mix (TOYOBO Bio-Technology). the linearized pMRNA<sup>XP</sup> vector and the PCR fragment of spike protein DNA were clean up by Wizard SV Gel and PCR Clean-Up System (Promega). The PCR fragment of spike protein DNA were cloned into linearized pMRNAXP vector using In-Fusion HD Cloning Kit (Clontech Laboratories, Inc.). The cloning mixture was transformed to One Shot<sup>TM</sup> TOP10 Chemically Competent *E. coli* (Invitrogen<sup>TM</sup>) and incubated at 37 °C overnight. Quick Taq HS DyeMix (TOYOBO Bio-Technology) was used for screening for successful construct. Insert-specific primer and backbone-specific primer were designed for colony PCR. Single clone was selected by pipet tip to conduct PCR. The PCR products were analyzed by agarose gel electrophoresis. the possible candidates were selected and analyzed by DNA sequencing.

### **Synthesis of polymers**

The polymerization process was done according to published procedures<sup>2</sup> with modifications where applicable. Briefly, stock solutions of the monomers (2 M in DMF), initiators (50 mM in DMF, fresh prepared), terminator (iodoacetamide, 0.5 M in H<sub>2</sub>O, fresh prepared), and triethanolamine (TEOA) buffer (1 M, pH = 7.0) were prepared. The initiator was added to 80  $\mu$ L of mixture buffer (DMF/TEOA = 1/1) and 10  $\mu$ L of the monomer stock solution (a v/v ratio of 1:1 was used for hetero-polymers P1/P3, P2/P3, P1/P4, P2/P4, P1/P5, and P2/P5). After 30 min of agitation at room temperature, the polymerization reaction was quenched by addition of 1.9 mL of the terminator stock solution. The resulting polymer was dialyzed against H<sub>2</sub>O in the same day. The solution was lyophilized and the polymers were kept at -20 °C. For the in vitro

and in vivo experiment, the initiator was mixed with 5% IP followed by the same protocol mentioned above.

### **Formulation of WT spike mRNA to form mRNA-PNP**

To obtain the WT spike mRNA, the linear DNA that contained the T7 promoter, 50 untranslated region, 30 untranslated region, S-2P, and poly(A) tail signal sequence was amplified by using TOOLS Ultra High Fidelity DNA Polymerase (BIOTOOLS Co., Ltd.) with 1  $\mu$ L of the DNA template in an mMESSEAGEmMACHINE Kit (Thermo Scientific) at 37 °C for 1 h according to the manufacturer's protocol. The mRNA was purified by RNA cleanup kit (BioLabs) according to the manufacturer's protocol and stored at -80 °C until further use. For the formulation of mRNA-PNP, the mRNA was encapsulated in a corresponding polymer using a self-assembly process, that is, the polymer in ethanol phase (10 mg/mL) was mixed with an aqueous solution of mRNA (1 mg/mL) at pH 4.0 in a 3 to 1 N/P ratio. The mRNA-PNP was dialyzed against PBS buffer (pH 7.4) using Micro Float-A-Lyzer (10 kDa MWCO, spectrum lab) overnight at 4 °C and stored at -40 °C until further use.

### **Quantification of encapsulated mRNA**

Encapsulation efficiency was determined by Quant-iT™ RiboGreen™ RNA Reagent and Kit (Thermo Scientific™). The prepared mRNA polymersome was treated with 10 mM GSH overnight, and then the solution was diluted 250-fold with 1X TE buffer and further diluted 2-fold with TE buffer or TE buffer containing 2% Triton X-100. mRNAs were prepared as 100, 50, 25, 12.5 and 0 ng/ml in TE or TE buffer containing 1% Triton X-100 to establish the standard curve. After incubation at 37 °C for 10 minutes, Quant-iT™ RiboGreen™ RNA Reagent was added into well. The fluorescence intensity was measured by CLARIOstar® Plus (BMG Labtech).

### **HEK293T cell transfection**

HEK293T cells were plated at  $5 \times 10^5$  cells per well in a 6-well plate in 2.5 mL DMEM media. 1  $\mu$ g of the GFP mRNA or 3  $\mu$ g of WT spike mRNA was formulated with the corresponding polymer by the procedure mentioned above and then added to the cells. 18 hours post-transfection, GFP and spike expression were monitored by fluorescence microscopy and western blotting, respectively. For the WB, cells containing spike protein were lysed with 200  $\mu$ L RIPA lysis buffer including protease inhibitor and incubated for 10 minutes. Cells were then vortexed, centrifuged and analyzed by western blot with polyclonal anti-SARS-CoV-2 S protein antibodies (1:5000 with 1% BSA) followed by HRP conjugated anti-rabbit antibody (1:10000). The spike protein was detected by chemiluminescent HRP substrate and visualized by a trans-illuminator

(FUJIFILM LAS3000).

### **Cell viability assay**

The HEK293T cells were transfected with mRNA-PNP and the cell viability was evaluated by MTT assay kit. Briefly, HEK293T cells were seeded in 96-well plates overnight. Then, different types of mRNA-PNP were transfected in 100  $\mu$ l DMEM with 10% FBS. After incubation for 48 h, the media was replaced by 100  $\mu$ l PBS buffer containing 10  $\mu$ l of MTT solution in each well for 1 h. The absorption of each well at 450 nm was tested by a microplate reader to calculate the OD values. The cell viability was determined by the formula:  $(OD_{\text{experiment}} - OD_{\text{blank}}) / (OD_{\text{control}} - OD_{\text{blank}}) \times 100\%$ .  $OD_{\text{control}}$  is the absorbance of the cells without any treatment.

### **Glycan-PNP and DC-SIGN binding assay by ELISA**

To assess binding of DC-SIGN to mannoside-PNP, ELISA plates were coated with mRNA-PNP(I5-P1/P5), mRNA-PNP (I6-P1/P5), mRNA-PNP (I7-P1/P5), mRNA-PNP (I8-P1/P5), mRNA-PNP(I9-P1/P5), or mRNA-PNP(I10-P1/P5) (10 mg/mL) in PBS at 4 °C overnight. The plate was incubated with diluted DC-SIGN ECD (15 to 0.075 nM in HEPES buffer containing 20 mM HEPES, 150 mM NaCl, 10 mM CaCl<sub>2</sub>, 0.1% BSA) at pH 7.4, 6.0, and 5.0 for 1 h at rt. The bound DC-SIGN ECD was detected using HRP-conjugated anti-DC-SIGN (B2) IgG antibody (Santa Cruz Biotechnology). After 1 h of incubation at rt, the plate was treated with tetramethylbenzidine (TMB) for 10 min. The optical density was measured at 450 nm using a microplate reader after addition of 0.5 M sulfuric acid to the plate. The apparent K<sub>d</sub> was calculated by a nonlinear regression curve fit for total binding using GraphPad Prism.

### **Assay of mRNA-PNP binding to DC-SIGN-Fc, MMR-Fc, MINCLE-Fc, Dectin-2-Fc, and Langerin-Fc via ELISA**

To assess binding of receptor proteins to mannoside modified PNP, ELISA plates were coated with mRNA-PNP(I1-P1/P5), mRNA-PNP (I8-P1/P5), mRNA-PNP (I9-P1/P5), or mRNA-PNP (I10-P1/P5) (10 mg/mL) in PBS at 4 °C overnight. The plate was incubated with diluted DC-SIGN-Fc, MMR-Fc, MINCLE-Fc, Dectin-2-Fc, or Langerin-Fc (0.625  $\mu$ g/mL in buffer) at pH 7.4 for 1 h at rt. The bound protein was detected using HRP-conjugated anti-Fc IgG antibody. After 1 h of incubation at rt, the plate was treated with tetramethylbenzidine (TMB) for 10 min. The mean optical density was measured at 450 nm after addition of 0.5 M sulfuric acid to the plate using a microplate reader.

### **Quantification of glycan content on PNP**

A 4M solution of trifluoroacetic acid (2 mL) was added to the PNP solution with stirring at 110 °C for 3 h. The acid was removed, and the resulting residue was lyophilized to dryness. A standard curve was prepared with different concentrations of free mannose (0, 1.5625, 3.125, 6.25, 12.5, 25, and 50 µM). The standards and lyophilized residues were prepared in 30 µL ddH<sub>2</sub>O, and then loaded to the High-Performance Anion-Exchange Chromatography with Pulsed Amperometric Detection (HPAEC-PAD) (with column: Dionex CarboPac PA10 (2 X 250 mm), flow rate = 0.25 mL/min, temp = 20 °C, waveform selector: Gold, Garbo, Quad, reference electrode: AgCl, mobile phase: Eluent A = 200 mM NaOH, Eluent B = H<sub>2</sub>O). The area at corresponding retention time was calculated to determine the amount of mannose.

### **Splenic cells preparation and BMDCs culture**

To prepare splenic cells, mouse spleen was homogenized with the frosted end of glass slide, treated with RBC lysis buffer (Sigma) to deplete red blood cells (RBCs), followed by passing through the cell strainer (BD Biosciences). Bone-marrow derived dendritic cells (BMDCs) were prepared as described.<sup>3</sup> Briefly, bone marrow was isolated from mouse femurs and tibiae and treated with RBC lysis buffer (Sigma-Aldrich) to deplete RBCs. Cells were then cultured in RPMI-1640 containing 10% heat inactivated FBS (Thermo Fisher Scientific), 1% Penicillin/Streptomycin (Thermo Fisher Scientific), 50 µM 2-mercaptoethanol (Thermo Fisher Scientific), and 20 ng/mL recombinant mouse GM-CSF (eBioscience) at a density of  $2 \times 10^5$  cells/mL. The cells were supplemented with an equal volume of the complete culture medium described above at day 3 and refreshed with one-half the volume of medium at day 6. At day 8, the suspended cells were then harvested.

### **Treatment of PNP to splenic cells and BMDCs**

Splenic cells or BMDCs were incubated with 1:2000 mRNA-PNP(I1-P1/P4-FITC-P5) or mRNA-PNP(I5-P1/P4-FITC/P5) (diluted by a stock of 10 mg/mL) in RPMI-1640 at 37 °C for 1 hours. Cells were blocked with Fc receptor binding inhibitor (clone: 93, eBioscience) for 20 minutes. Splenocytes were stained with antibodies against CD3 (clone: 17A2, BV421-conjugated, Biolegend), CD19 (clone: 1D3, PECy7-conjugated, BD Biosciences). BMDCs were stained with antibody against CD11c (clone N418 APC-conjugated, Biolegend). Labeled cells were analyzed using FACSC and Flow Cytometer (BD Biosciences).

### **Determination of BMDC uptake and endosome escape of PNP**

BMDCs were seeded on an 8 well glass bottom culture slide (IBIDI, IB-80827) one day before the treatment. BMDCs were treated with FITC-conjugated mRNA-PNP for 2-4

hours. Thirty minutes before harvesting, cells were treated with 75 nM lysotraker Deep Red (ThermoFisher, L12492). Fluorescent images were examined by confocal microscope (Leica TCS SP8X WLL Confocal Super resolution Microscope). The colocalization rate was estimated using the software, Leica Application Suite X 3.5.2.18963, with default setting (threshold 30% and background 20% excluded). From each sample, fifty cells were randomly selected to calculate the colocalization rate.

### **C2C12 cell culture**

The mouse muscle myoblast cell line C2C12 was purchase from the Bioresource Collection and Research Center, Taiwan. C2C12 cells were cultured in DMEM with high-glucose (ATCC) supplemented with 10% FBS and 1 × antibiotic-antimycotic. Cells were incubated at 37°C with 5% CO<sub>2</sub> and humidified atmosphere control. Culture medium was changed every 2 to 3 days.

### **Treatment of C2C12 with mRNA-PNPs**

Cultured C2C12 myoblasts were detached from a culture dish using 0.25% Trypsin-EDTA (Gibco), and neutralized with growth medium containing 10% FBS. mRNA-PNP(I1-P1/P4-FITC-P5) or mRNA-PNP (I9-P1/P4-FITC/P5) was added to 200 μL C2C12 cells ( $2 \times 10^5$  cells) in growth medium to reach a final dilution of 1:1000, 1:2000, 1:4000, or 1:8000 to the original stocks (10 mg/mL) . Three time points were measured: 5 min, 1 hr and 24 hr.

### **Flow Cytometry**

After incubation with mRNA-PNP (I1-P1/P4-FITC-P5) or mRNA-PNP (I9-P1/P4-FITC/P5) mRNA, BMDC cells were washed with ice-cold FACS buffer (1% FBS in 1 × DPBS with 0.1% Sodium Azide), and incubated with purified anti-mouse CD16/32 antibody (BioLegend) in FACS buffer on ice for 20 min, followed by washing with FACS buffer. BMDCs were stained with APC anti-mouse CD11c antibody (BioLengend) at 4°C for 30 min, and washed with FACS buffer. Finally, BMDCs were stained with propidium iodide (Sigma-Aldrich). C2C12 cells were centrifuged and washed with FACS buffer. Cells were stained with propidium iodide. Flow cytometry was performed on FACSCanto flow cytometer (BD Bioscience).

### **Culture of U937 and U937/DC-SIGN cells and incubation with mRNA-PNPs**

The human monocyte cell line U937 (ATCC CRL-1593.2) and U937/DC-SIGN cell line (ATCC CRL-3253) were obtained from the American Type Culture Collection (ATCC). U937/DC-SIGN cells were cultured in RPMI 1640 medium with 10% FBS.

Cells were resuspended in 2 mL medium containing 1.25 µg mRNA-PNPs. In low temperature experiments, cells were incubated with medium containing 10 mM EDTA (or non) for 15 min at 4 °C, prior to incubation with mRNA-PNPs. After 1 h incubation at 4 °C followed by 37 °C incubation for 30 min, cells were centrifuged at 500 x g for 3 min and the supernatant was discarded. Cells were resuspended in 200 µL icecold medium and analyzed by flow cytometry to detect the conjugated FITC signal with a 488 nm laser and a 525/50 nm filter. In the antibody inhibition study,  $4 \times 10^5$  U937/DC-SIGN cells were pretreated with 10 µg/mL anti-DC-SIGN (B2) IgG antibody for 20 min on ice followed by incubation with mRNA-PNPs at 37 °C for 30 min. Cells were centrifuged at 500 x g for 3 min and the supernatant was discarded to remove unbound mRNA-PNPs followed by further flow analysis.

### **Animal immunizations**

BALB/c mice aged 6 to 8 wk old (n = 5) were immunized intramuscularly with 15 µg of mRNA-PNP in phosphate-buffered saline (PBS). Animals were immunized at wk 0 and boosted at wk 2, and serum samples were collected from each mouse 1 wk after the second immunization.

### **Measurement of serum IgG titer**

ELISA was used to determine the IgG titer of the mouse serum. The wells of a 96-well ELISA plate (Greiner Bio-One) were coated with 100 ng SARS-CoV-2 spike protein (ACROBiosystems) in 100 mM sodium bicarbonate buffer, pH 8.8 at 4°C overnight. The wells were blocked with 200 uL 5% skim milk in 1x PBS at 37 °C for 1 hour and washed with 200 uL PBST (1X PBS, 0.05% Tween 20, pH 7.4) three times. Mice serum samples with 2-fold serial dilution were added to wells followed by incubation at 37 °C for 2 hours and washing with 200 uL PBST six times. The wells were incubated with 100 uL HRP conjugated anti-mouse secondary antibody (1:10000, in PBS) at 37 °C for 1 hour and washed with 200 uL PBST six times. 100 µL horseradish peroxidase substrate (1-Step™ Ultra TMB-ELISA Substrate Solution) (Thermo Scientific™) was added to wells followed by 100 uL 1M H<sub>2</sub>SO<sub>4</sub>. After incubation for 30 mins, absorbance (OD 450 nm) was measured by SpectraMax M5.

### **Pseudovirus neutralization assay**

Pseudovirus was constructed by the RNAi Core Facility at Academia Sinica using a procedure similar to that described previously.<sup>4</sup> Briefly, the pseudotyped lentivirus carrying SARS-CoV-2 spike protein was generated by transiently transfecting HEK-293T cells with pCMV-ΔR8.91, pLAS2w.Fluc.Ppuro. HEK-293T cells were seeded one day before transfection, and indicated plasmids were delivered into cells by using



TransITR-LT1 transfection reagent (Mirus). The culture medium was refreshed 16-hr and harvested 48-hr and 72-hr post-transfection. Cell debris was removed by centrifugation at 4,000 xg for 10 min, and the supernatant was passed through 0.45- $\mu$ m syringe filter (Pall Corporation). The pseudotyped lentivirus was aliquoted and then stored at -80 °C. To estimate the lentiviral titer by AlarmaBlue assay (Thermo Scientific), The transduction unit (TU) of SARS-CoV-2 pseudotyped lentivirus was estimated by using cell viability assay in response to the limited dilution of lentivirus. In brief, HEK-293T cells stably expressing human ACE2 gene were plated on a 96-well plate one day before lentivirus transduction. To determine the titer of pseudotyped lentivirus, different amounts of lentivirus were added into the culture medium containing polybrene (final concentration 8  $\mu$ g/ml). Spin infection was carried out at 1,100 xg in a 96-well plate for 30 minutes at 37 °C. After incubating cells at 37 °C for 16 hr, the culture medium containing virus and polybrene were removed and replaced with fresh complete DMEM containing 2.5  $\mu$ g/mL puromycin. After treating puromycin for 48 hrs, the culture medium was removed and the cell viability was measured by using 10% AlamarBlue reagents according to manufacturer's instruction. The survival rate of uninfected cells (without puromycin treatment) was set as 100%. The virus titer (transduction units) was determined by plotting the survival cells versus diluted viral dose. For neutralization assay, heat-inactivated sera or antibodies were serially diluted and incubated with 1,000 TU of SARS-CoV-2 pseudotyped lentivirus in DMEM for 1 h at 37°C. The mixture was then inoculated with 10,000 HEK-293T cells stably expressing human ACE2 gene in a 96-well plate. The culture medium was replaced with fresh complete DMEM (supplemented with 10% FBS and 100 U/mL penicillin/streptomycin) 16 h after infection and continuously cultured for another 48 h. The expression level of luciferase gene was determined by using Bright-Glo Luciferase Assay System (Promega). The relative light unit (RLU) was detected by Tecan i-control (Infinite 500). The percentage of inhibition was calculated as the ratio of RLU reduction in the presence of diluted serum to the RLU value of no serum control using the formula  $(RLU^{\text{control}} - RLU^{\text{Serum}})/RLU^{\text{control}}$ .

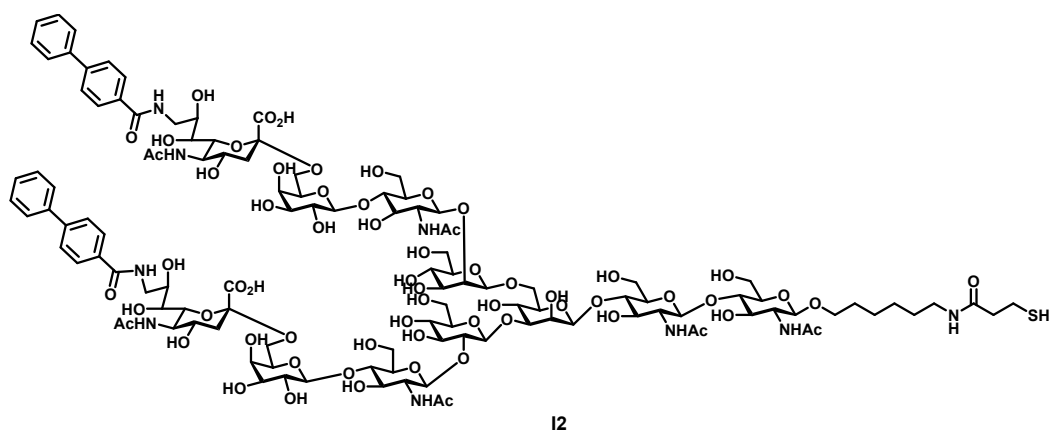

**12**

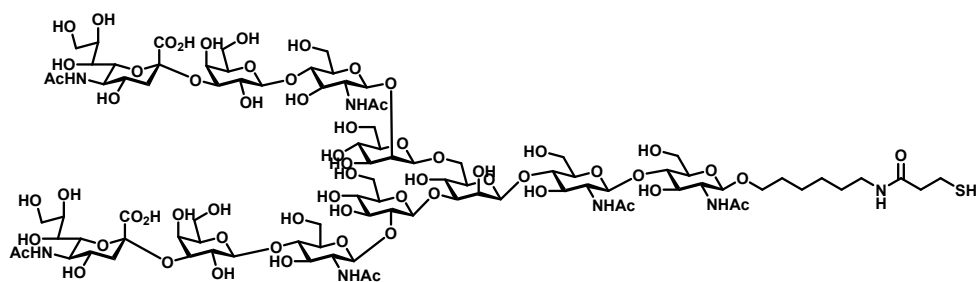

**13**

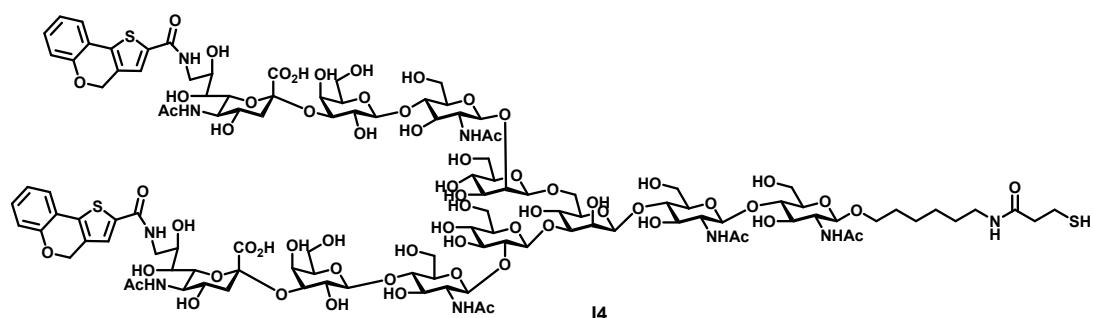

**14**

**Scheme S1.** Structures of initiators **12**, **13**, and **14**.

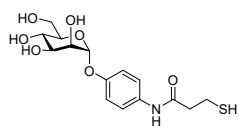

**I5**

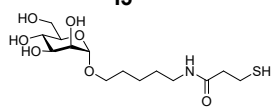

**I6**

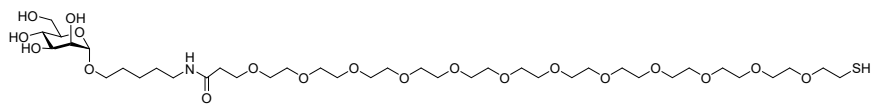

**I7**

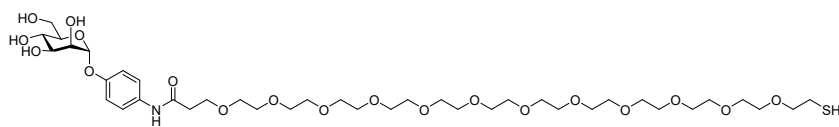

**I8**

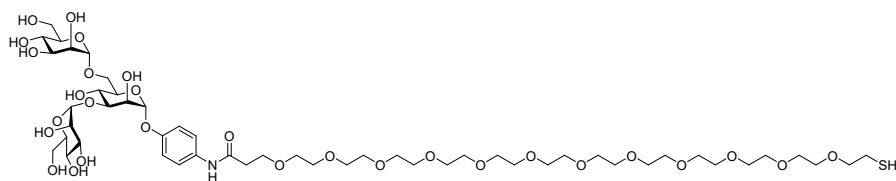

**I9**

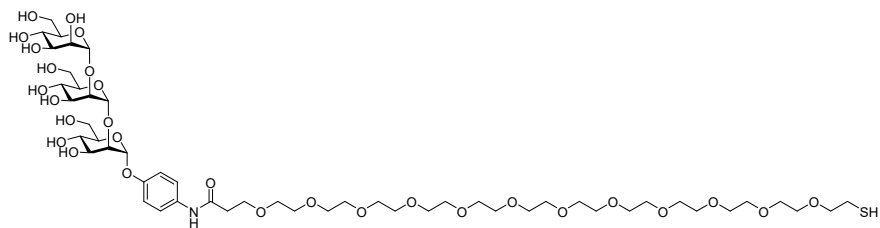

**I10**

**Scheme S2.** Structures of initiator **I5**, **I6**, **I7**, **I8**, **I9** and **I10**.

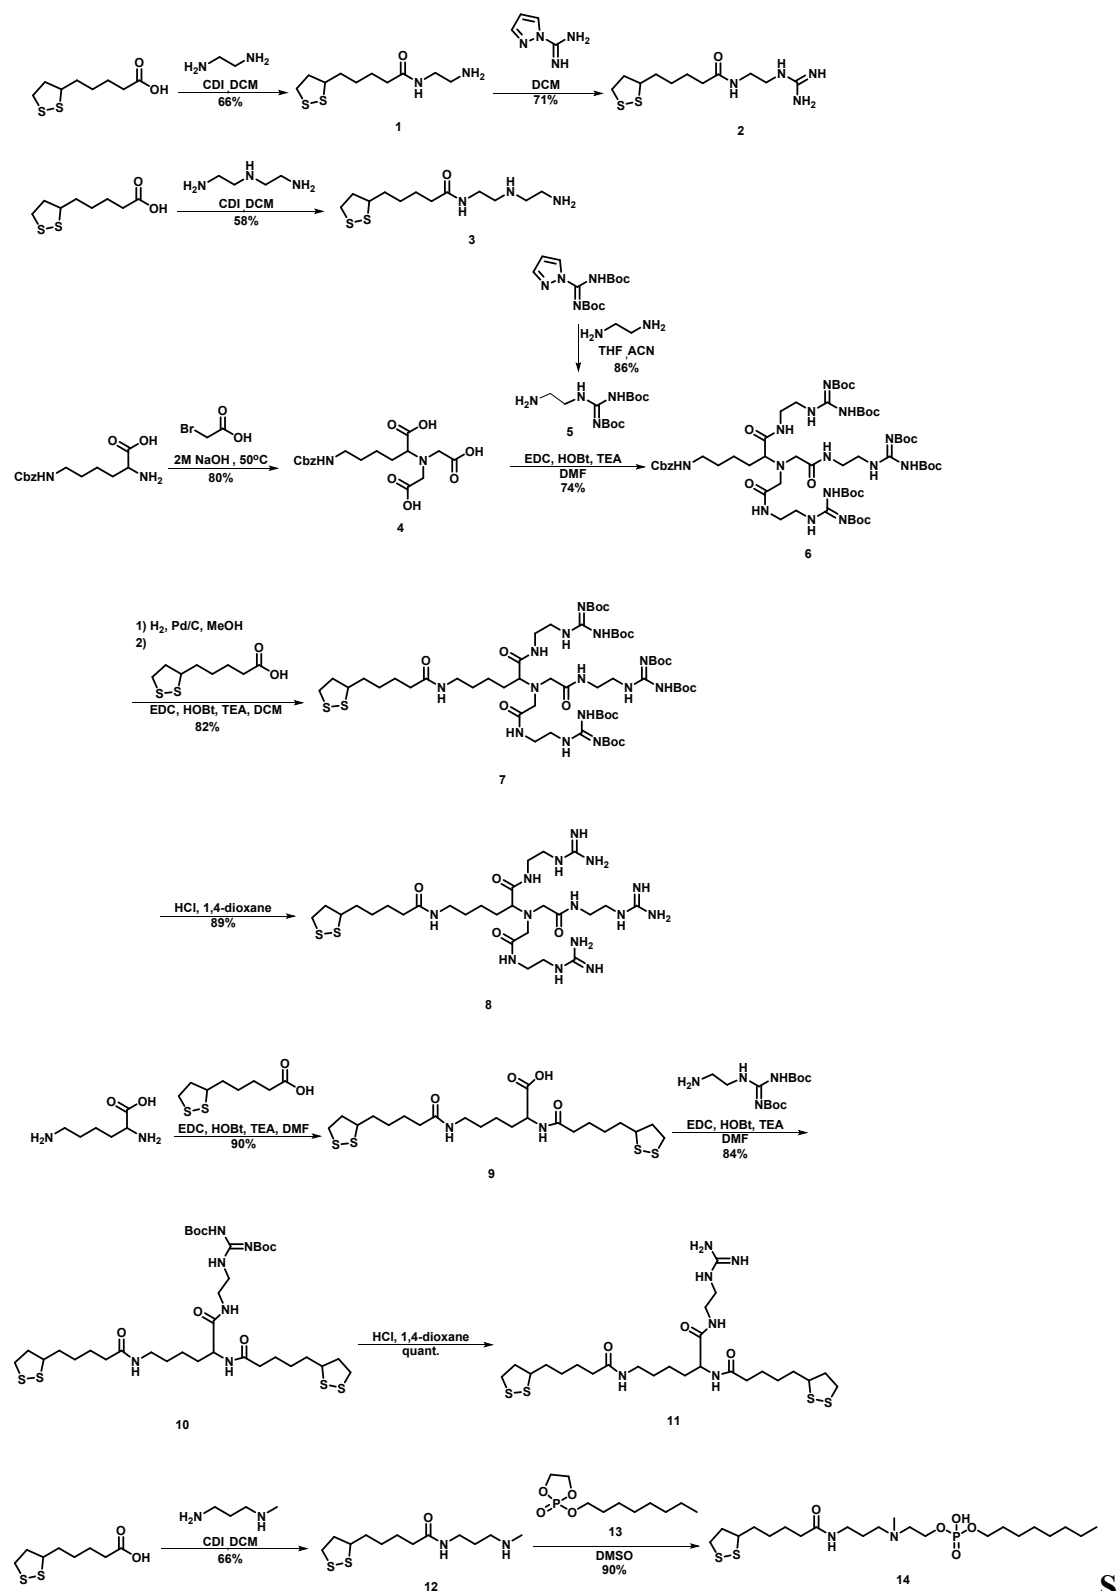

cheme S3. Synthetic procedures for 2, 3, 8, 11, 14.

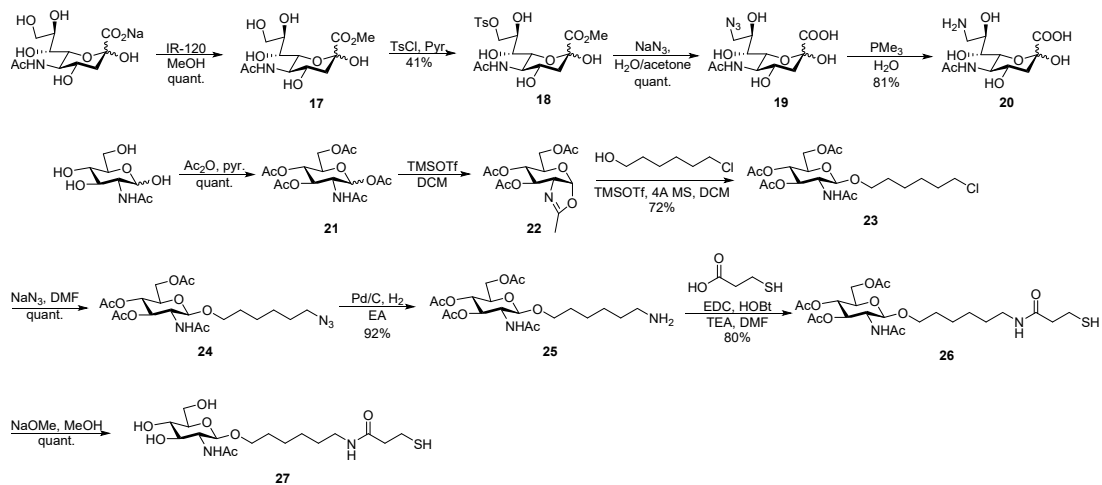

**Scheme S4.** Chemical synthesis of 9<sup>Am</sup>Neu5Ac **20** and GlcNAc-SH **27**.

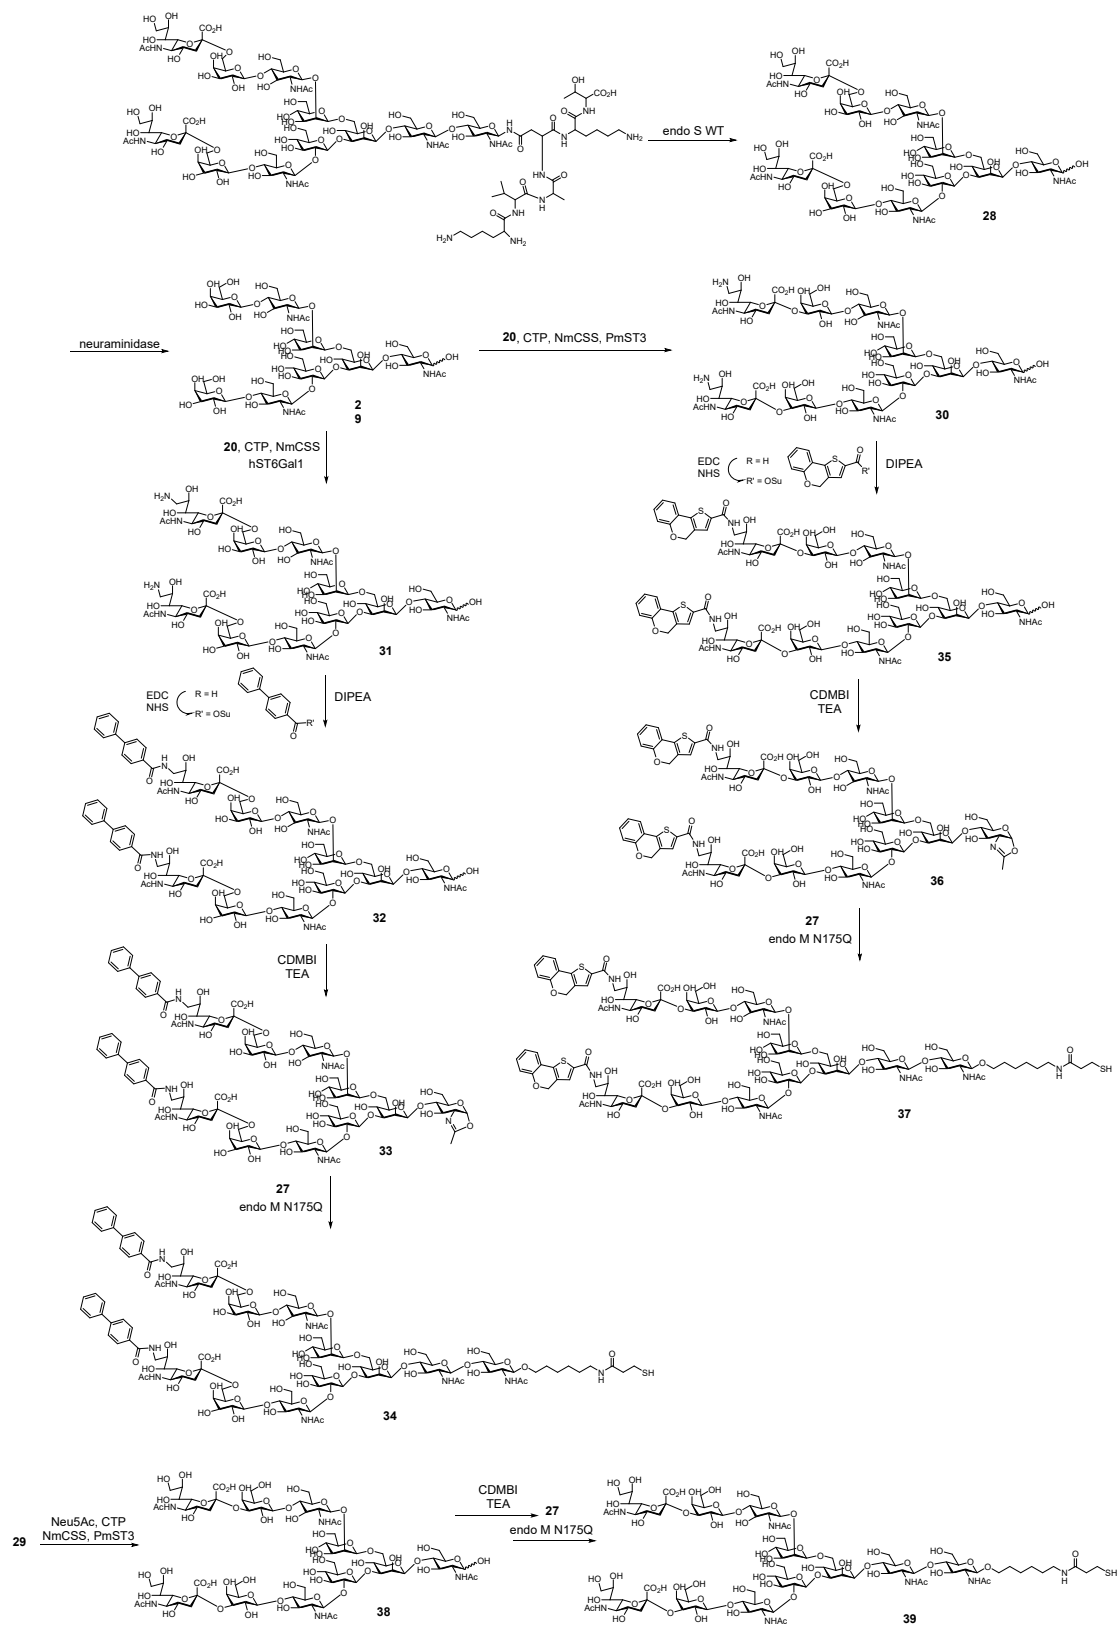

Scheme S5. Chemoenzymatic synthesis of  $9^{\text{BPC}}\text{Neu5Ac-}\alpha\text{2,6-SCT-SH}$  **34**,

9<sup>TCC</sup>Neu5Ac- $\alpha$ 2,3-SCT-SH **37** and Neu5Ac- $\alpha$ 2,3-SCT-SH **39** N-glycan.

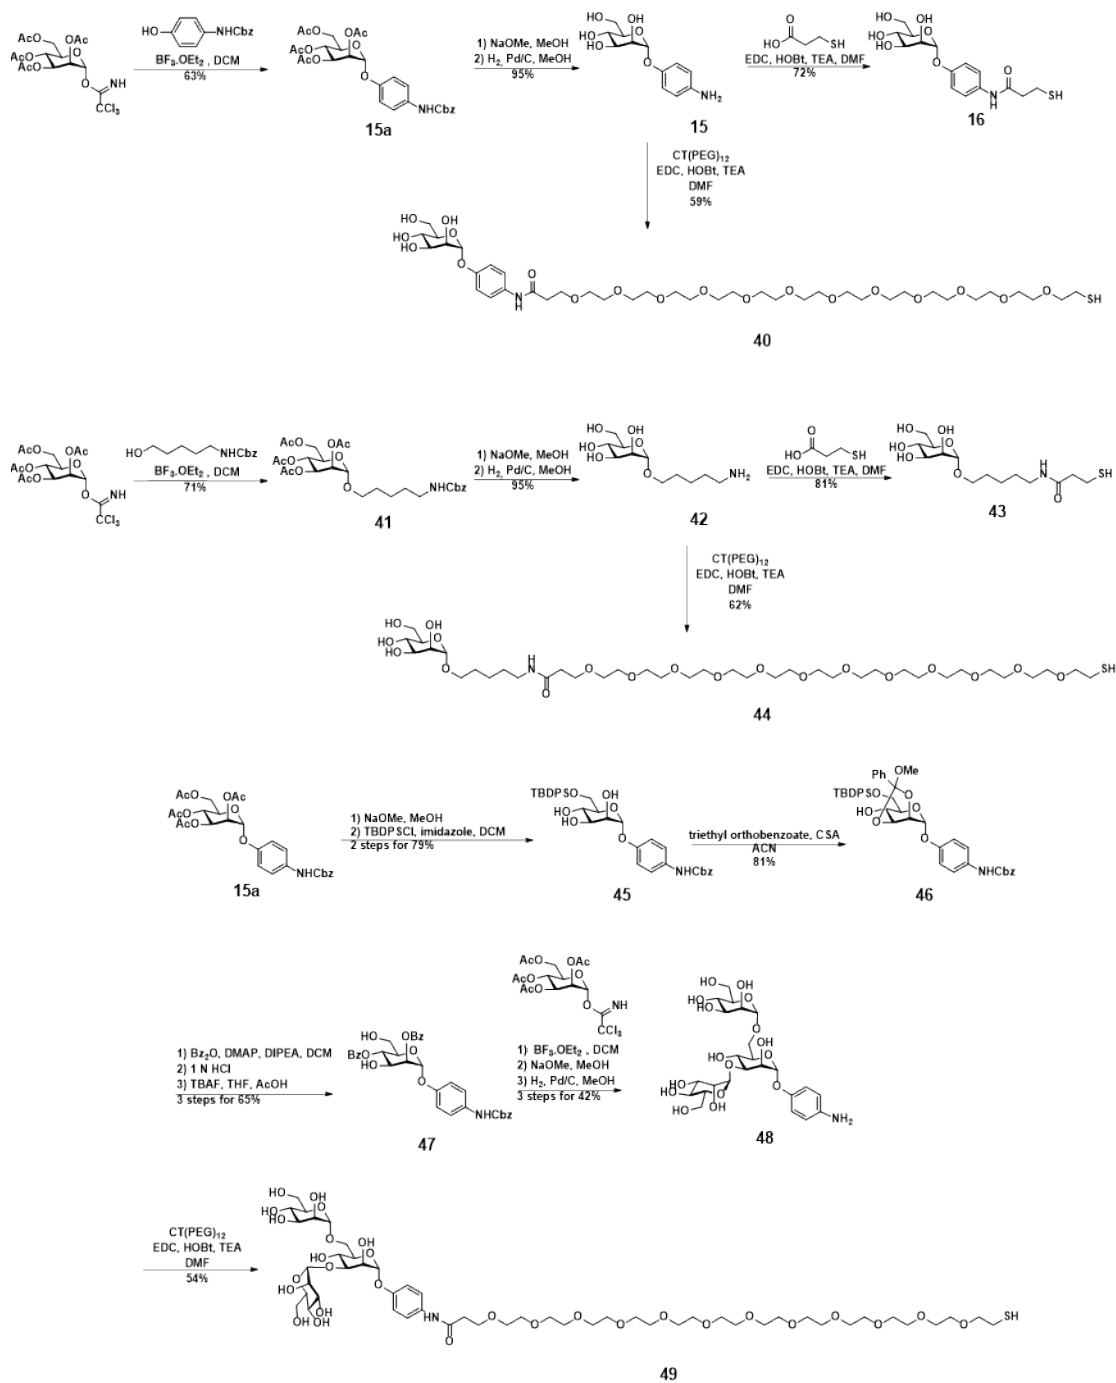

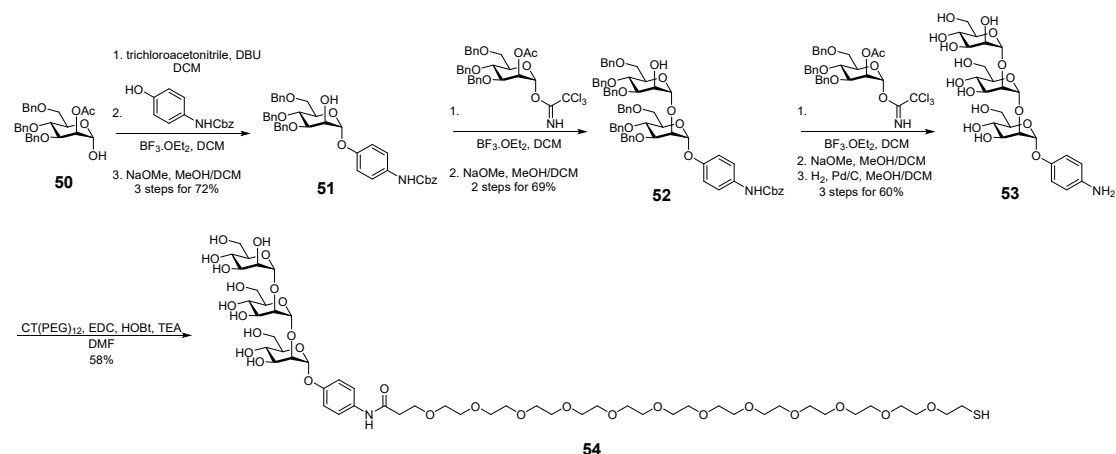

**Scheme S6.** Synthetic procedures for **16**, **40**, **43**, **44**, **49** and **54**.

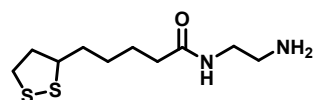

**Compound 1**<sup>2</sup>. Compound **1** was synthesized and characterized based on a published procedure. <sup>1</sup>H NMR (600 MHz, CDCl<sub>3</sub>): δ 5.92 (br, 1H), 3.60-3.57 (m, 1H), 3.29 (dt, *J* = 11.27, 7.2 Hz, 2H), 3.21-3.10 (m, 2H), 2.86-2.79 (m, 2H), 2.55-2.31 (m, 1H), 2.21 (t, 2H, *J* = 7.4 Hz), 1.90-1.85 (m, 1H), 1.77-1.41 (m, 8H).

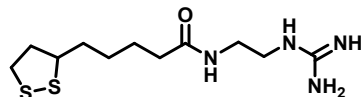

**Compound 2**<sup>2</sup>. Compound **2** was synthesized and characterized based on a published procedure. <sup>1</sup>H NMR (600 MHz, MeOD): δ 3.98 (s, 1H), 3.61-3.39 (m, 1H), 3.30-3.22 (m, 4H), 3.22-2.88 (m, 2H), 2.56-2.30 (m, 1H), 2.21 (t, *J* = 7.4 Hz, 2H), 1.98-1.72 (m, 1H), 1.79-1.30 (m, 6H).

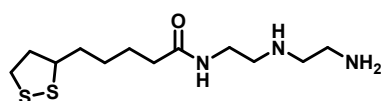

**Compound 3**<sup>5</sup>. Compound **3** was synthesized and characterized based on a published procedure. <sup>1</sup>H NMR (600 MHz, CDCl<sub>3</sub>): δ 3.61 – 3.56 (m, 1H), 3.41 – 3.34 (m, 1H), 3.31 – 3.16 (m, 8H), 3.14 – 3.06 (m, 2H), 2.54 – 2.40 (m, 1H), 2.08 (t, *J* = 7.4 Hz, 2H), 1.95 – 1.86 (m, 1H), 1.69 (s, 1H), 1.55 (m, 3H), 1.47 – 1.31 (m, 2H).

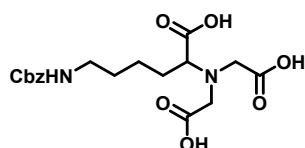

**Compound 4**<sup>2</sup>. Compound **4** was synthesized and characterized according to a



published protocol.  $^1\text{H}$  NMR (600 MHz, DMSO- $d_6$ ):  $\delta$  7.44-7.12 (m, 5H), 5.02 (s, 2H), 3.62-3.41 (m, 4H), 3.35 (t, 1H,  $J$  = 7.2 Hz), 2.98 (d, 2H,  $J$  = 5.9 Hz), 1.79-1.03 (m, 6H).

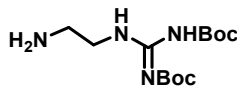

**Compound 5** <sup>6</sup>. Compound **5** was synthesized and characterized according to a published protocol.  $^1\text{H}$  NMR (600 MHz,  $\text{CDCl}_3$ ):  $\delta$  11.52 (br, 1H), 8.62 (s, 1H), 3.45 (q,  $J$  = 4.00 Hz, 2H), 2.86 (t,  $J$  = 4.00 Hz, 2H), 1.49 (s, 9H), 1.48 (s, 9H).

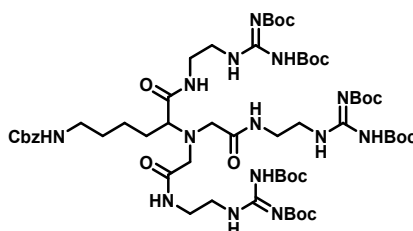

**Compound 6**. A solution of **4** (0.126 mmol) in DMF (1 mL) was preactivated with EDC (0.506 mmol), HOBt (0.506 mmol), and trimethylamine (0.57 mmol) under nitrogen for 30 min. **5** (0.506 mmol) in DMF (1 mL) was then added to the above solution and the resulting solution was stirred at rt for 12 h. The mixture was concentrated to dryness *in vacuo* and then diluted with ethyl acetate. The organic layer was washed with  $\text{H}_2\text{O}$  for three times and was dried over  $\text{MgSO}_4$ , filtered, and concentrated. The crude product was purified by column chromatography on silica gel (MeOH/DCM 1:20) to yield **6** (134 mg, 74%).  $^1\text{H}$  NMR (600 MHz,  $\text{CDCl}_3$ ):  $\delta$  11.45–11.33 (m, 3H), 8.53–8.45 (m, 3H), 8.35 (t,  $J$  = 4.9 Hz, 2H), 7.33–7.25 (m, 5H), 5.04 (s, 2H), 3.59–3.19 (m, 16H), 3.15–3.12 (q,  $J$  = 6.0 Hz, 2H), 3.06–3.04 (t,  $J$  = 6.9 Hz, 1H), 1.77-1.71 (m, 1H), 1.55-1.32 (m, 59H). HRMS (ESI) calcd for  $\text{C}_{57}\text{H}_{97}\text{N}_{14}\text{O}_{17}$   $[\text{M}+\text{H}]^+$   $m/z$  1249.7156; found: 1249.7166.

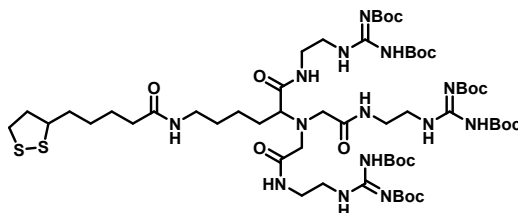

**Compound 7**. A solution of **6** (0.12 mmol) in MeOH (2 mL) was added palladium on charcoal (Pd/C, 10% Pd content, 13 mg). The mixture was stirred at rt under atmosphere of hydrogen gas for 6 h. The solution was filtered through a pad of Celite. The residue was concentrated to dryness *in vacuo* and the resulting residue was dissolved in DCM (2 mL). Lipic acid (0.152 mmol), EDCI (0.304 mmol), HOBt (0.304 mmol), and TEA

(0.304 mmol) were added to the mixture with stirring at rt for 2 h. The mixture was concentrated to dryness *in vacuo* and then diluted with ethyl acetate. The organic layer was washed with H<sub>2</sub>O for three times and dried over MgSO<sub>4</sub>, filtered, and concentrated. The crude product was purified by column chromatography on silica gel (MeOH/DCM 1:50) to yield **7** (94 mg, 82%). <sup>1</sup>H NMR (600 MHz, CDCl<sub>3</sub>): δ 11.48–11.30 (m, 3H), 8.57–8.46 (m, 3H), 8.40 (t, *J* = 5.2 Hz, 2H), 8.15–8.12 (m, 1H), 6.22–6.18 (m, 1H), 3.60–3.34 (m, 16H), 3.28–3.04 (m, 7H), 2.48–2.38 (m, 1H), 2.17–2.14 (t, *J* = 7.4 Hz, 2H), 1.92–1.71 (m, 11H), 1.71–1.59 (m, 4H), 1.57–1.34 (m, 64H). HRMS (ESI) calcd for C<sub>57</sub>H<sub>103</sub>N<sub>14</sub>O<sub>16</sub>S<sub>2</sub> [M+H]<sup>+</sup> *m/z* 1303.7118; found: 1303.7129.

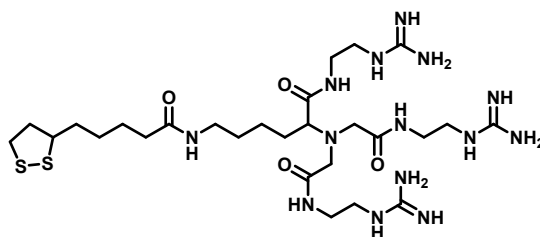

**Compound 8.** **7** (0.08 mmol) was added to a solution of 4M HCl (0.5 mL) in 1,4-dioxane (0.5 mL), and the mixture was stirred at rt for 12 h. Then, the solution was removed and dried *in vacuo* to yield **8** (24 mg, 89%). <sup>1</sup>H NMR (600 MHz, D<sub>2</sub>O): δ 3.60–3.40 (m, 3H), 3.4–3.16 (m, 16H), 3.02 (s, 2H), 2.76 (s, 2H), 2.20–2.03 (m, 2H), 1.98–1.76 (m, 2H), 1.62–1.16 (m, 11H). <sup>13</sup>C NMR (150 MHz, D<sub>2</sub>O): δ 176.61, 175.62, 173.68, 172.92, 156.88 (x3), 66.01, 65.73, 56.57, 55.36, 55.24, 40.40 (x2), 40.27, 38.69, 37.99 (x3), 37.82, 35.44, 33.57, 28.66, 28.18, 27.73, 24.99, 22.71. HRMS (ESI) calcd for C<sub>27</sub>H<sub>55</sub>N<sub>14</sub>O<sub>4</sub>S<sub>2</sub> [M+H]<sup>+</sup> *m/z* 703.3967; found: 703.3995.

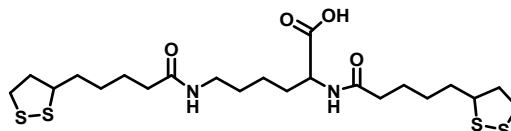

**Compound 9.** A solution of lipoic acid (2.5 mmol) in DMF (3 mL) was preactivated with EDCI (3 mmol), HOBt (3 mmol), and trimethylamine (3 mmol) under nitrogen for 30 min. Lysine (1 mmol) in DMF (3 mL) was then added to the mixture and the resulting solution was stirred at rt for 2 h. The mixture was concentrated to dryness *in vacuo* and then diluted with ethyl acetate. The organic layer was washed with H<sub>2</sub>O for three times and was dried over MgSO<sub>4</sub>, filtered, and concentrated. The crude product was purified by column chromatography on silica gel (MeOH/DCM 1:20) to yield **9** (230 mg, 90%). <sup>1</sup>H NMR (600 MHz, MeOD): δ 4.37–4.32 (dd, *J* = 4.6, 9.2 Hz, 1H), 3.63–3.57 (qui, *J* = 6.8 Hz, 2H), 3.22–3.17 (m, 4H), 3.14–3.09 (m, 2H), 2.51–2.45 (m, 2H), 2.29 (t, *J* = 7.0 Hz, 2H), 2.21 (t, *J* = 7.0 Hz, 2H), 1.95–1.86 (m, 3H), 1.79–1.62 (m, 9H), 1.60–1.40 (m, 8H). HRMS (ESI) calcd for C<sub>57</sub>H<sub>97</sub>N<sub>14</sub>O<sub>17</sub> [M+H]<sup>+</sup> *m/z* 1249.7156; found: 1249.7166.

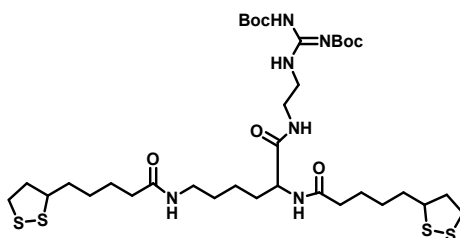

**Compound 10.** A solution of **9** (0.141 mmol) in DMF (1 mL) was preactivated with EDC (0.211 mmol), HOBT (0.211 mmol), and trimethylamine (0.282 mmol) under nitrogen for 30 min. **5** (0.183 mmol) in DMF (1 mL) was then added to the above solution and the resulting solution was stirred at rt for 2 h. The mixture was concentrated to dryness *in vacuo* and then diluted with ethyl acetate. The organic layer was washed with H<sub>2</sub>O for three times and was dried over MgSO<sub>4</sub>, filtered, and concentrated. The crude product was purified by column chromatography on silica gel (MeOH/DCM 1:20) to yield **10** (92 mg, 84%). <sup>1</sup>H NMR (600 MHz, CDCl<sub>3</sub>): δ 11.39 (s, 1H), 8.58 (t, *J* = 6.0 Hz, 1H), 7.98 (t, *J* = 4.6 Hz, 1H), 6.41 (d, *J* = 7.4 Hz, 1H), 5.79-5.74 (m, 1H), 4.37 (q, *J* = 7.5 Hz, 1H), 3.57-3.48 (m, 4H), 3.44-3.35 (m, 2H), 3.26-3.12 (m, 4H), 3.11-3.05 (m, 2H), 2.46-2.39 (m, 2H), 2.18 (t, *J* = 7.4 Hz, 2H), 2.13 (t, *J* = 7.4 Hz, 2H), 1.91-1.84 (m, 2H), 1.82-1.75 (m, 1H), 1.71-1.57 (m, 9H), 1.54-1.35 (m, 20H), 1.33-1.25 (m, 2H). <sup>13</sup>C NMR (150 MHz, CDCl<sub>3</sub>): δ 172.91, 172.55, 171.72, 162.87, 157.42, 153.03, 83.72, 79.97, 56.46, 56.44, 52.78, 41.19, 40.27, 40.26, 40.20, 38.96, 38.48 (x2), 36.48, 36.37, 36.30, 34.64, 34.61, 32.60, 29.18, 28.95, 28.88, 28.29 (x2), 28.05 (x2), 25.46, 25.36, 25.32, 22.29. HRMS (ESI) calcd for C<sub>35</sub>H<sub>63</sub>N<sub>6</sub>O<sub>7</sub>S<sub>4</sub> [M+H]<sup>+</sup> *m/z* 807.3641; found: 807.3655.

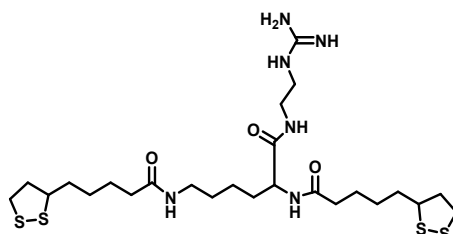

**Compound 11.** **10** (0.1 mmol) was added to a solution of 4 M HCl (0.5 mL) in 1,4-dioxane (0.5 mL), and the mixture was stirred at rt for 12 h. Then, the solution was removed and dried *in vacuo* to yield **8** (59 mg, quant.). The compound was used directly without further purification.

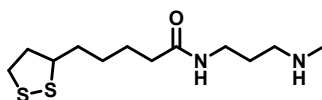

**Compound 12.** A solution of lipoic acid (3 mmol) and CDI (3.9 mmol) were dissolved in 25 mL of anhydrous DCM. This solution was added dropwise at 0 °C to 5 mL of anhydrous DCM containing 8 mmol of N-methyl-1,3-propanediamine. The reaction mixture was stirred for 40 min at 0 °C and 30 min at room temperature, then washed

with H<sub>2</sub>O for three times and dried over MgSO<sub>4</sub>, filtered, and concentrated to give **12** (589 mg, 66%). <sup>1</sup>H NMR (600 MHz, CDCl<sub>3</sub>): δ 3.57-3.50 (m, 1H), 3.31 (q, *J* = 5.8 Hz, 2H), 3.17-3.12 (m, 1H), 3.11-3.05 (m, 1H), 2.65 (t, *J* = 6.0 Hz, 2H), 2.46-2.40 (m, 1H), 2.39 (s, 3H), 2.15-2.11 (m, 2H), 1.91-1.84 (m, 1H), 1.72-1.54 (m, 6H), 1.49-1.37 (m, 2H). HRMS (ESI) calcd for C<sub>12</sub>H<sub>26</sub>N<sub>2</sub>OS<sub>2</sub> [M+H]<sup>+</sup> *m/z* 277.1408; found: 277.1399.

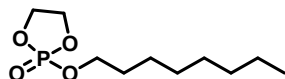

**Compound 13**<sup>7</sup>. Compound **13** was synthesized and characterized according to a published protocol. <sup>1</sup>H NMR (600 MHz, CDCl<sub>3</sub>): δ 4.50-4.38 (m, 4H), 4.19-4.15 (m, 2H), 1.74-1.70 (m, 2H), 1.38-1.20 (m, 12H), 0.89 (t, *J* = 7.2 Hz, 3H)

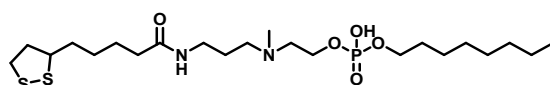

**Compound 14**. A solution of **12** (0.25 mmol) in 1 mL anhydrous DMF was mixed with **13** (0.25 mmol), and the mixture was stirred at 70 °C for 24 h then concentrated to dryness *in vacuo* to give **14** (116 mg, 90%). <sup>1</sup>H NMR (600 MHz, MeOD): δ 7.90 (s, 1H), 4.14-4.01 (m, 1H), 3.91-3.83 (m, 1H), 3.73-3.67 (m, 1H), 3.62-3.55 (m, 1H), 3.28 (t, *J* = 6.6 Hz, 2H), 3.21-3.15 (m, 1H), 3.13-3.06 (m, 1H), 2.98 (t, *J* = 7.2 Hz, 2H), 2.69 (s, 3H), 2.50-2.41 (m, 1H), 2.24 (t, *J* = 7.2 Hz, 2H), 1.93-1.84 (m, 1H), 1.76-1.59 (m, 6H), 1.51-1.43 (m, 2H), 1.43-1.37 (m, 1H), 1.36-1.25 (m, 5H), 0.92-0.88 (m, 3H). <sup>13</sup>C NMR (150 MHz, MeOD): δ 177.08, 79.68, 57.79, 48.91, 48.77, 48.04, 41.54, 39.55, 37.06, 36.91, 35.91, 33.85, 33.20, 32.09, 32.05, 30.44, 30.12, 27.73, 27.16, 26.81, 23.92, 14.65. HRMS (ESI) calcd for C<sub>22</sub>H<sub>44</sub>N<sub>2</sub>O<sub>5</sub>PS<sub>2</sub> [M-H]<sup>-</sup> *m/z* 511.2429; found: 511.2423.

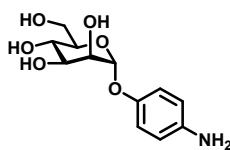

**Compound 15**<sup>8</sup>. Compound **15** was synthesized and characterized according to a published protocol. <sup>1</sup>H NMR (600 MHz, MeOD): δ 6.93 (d, *J* = 8.6 Hz, 2H), 6.71 (d, *J* = 8.6 Hz, 2H), 5.3 (s, 1H), 4.00-3.99 (m, 1H), 3.89-3.88 (m, 1H), 3.81-3.79 (m, 1H), 3.79-3.70 (m, 2H), 3.69-3.67 (m, 1H).

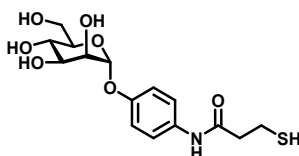

**Compound 16**. A solution of **15** (0.24 mmol) in DMF (2 mL) was mixed with EDC

(0.24 mmol), HOBt (0.24 mmol), trimethylamine (0.4 mmol), and 3-mercaptopropionic acid (0.2 mmol), and stirred under nitrogen at rt for 2 h. The mixture was concentrated to dryness *in vacuo*, and the crude product was purified by column chromatography on silica gel (MeOH/DCM 1:2) to yield **16** (72%). <sup>1</sup>H NMR (600 MHz, MeOD) δ 6.94 (d, *J* = 8.6 Hz, 2H), 6.72 (d, *J* = 8.6 Hz, 2H), 5.30 (s, 1H), 4.00 (dd, *J* = 3.4, 1.8 Hz, 1H), 3.89 (dd, *J* = 9.7, 3.4 Hz, 1H), 3.81-3.67 (m, 4H), 2.72 (t, *J* = 6.8 Hz, 2H), 2.60 (t, *J* = 6.8 Hz, 2H). <sup>13</sup>C NMR (150 MHz, MeOD) δ 176.55, 151.13, 143.23, 119.25(x2), 117.93 (x2), 101.49, 101.32, 75.10, 72.43, 72.18, 68.42, 62.66, 40.34, 20.70. HRMS (ESI) calcd for C<sub>15</sub>H<sub>22</sub>NO<sub>7</sub>S [M+H]<sup>+</sup>: 360.1117, found 360.1101.

**Compound 17-20**<sup>9</sup> were synthesized according to published article.

**Compound 21-25**<sup>10</sup> were synthesized according to the procedure published previously.

### **Compound 26.**

Compound **25**<sup>11</sup> (0.43 mmol) in DCM (5 mL) was mixed with EDC (0.52 mmol), HOBt (0.52 mmol), trimethylamine (0.86 mmol), and 3-mercaptopropionic acid (0.47 mmol), and the resulting solution was stirred under nitrogen at rt for 2 h. The mixture was concentrated to dryness *in vacuo*, and the crude product was purified by column chromatography on silica gel (MeOH/DCM 1:10) to yield **26** (184 mg, 80%). <sup>1</sup>H NMR (600 MHz, CDCl<sub>3</sub>) δ 5.96 (d, *J* = 8.6 Hz, 1H), 5.28 (t, *J* = 9.6 Hz, 1H), 5.05 (t, *J* = 9.4 Hz, 1H), 4.64 (d, *J* = 8.4 Hz, 1H), 4.24 (dd, *J* = 12.3, 4.7 Hz, 1H), 4.11 (dd, *J* = 12.3, 2.5 Hz, 1H), 3.86-3.80 (m, 2H), 3.68-3.66 (m, 1H), 3.47-3.43 (m, 1H), 3.34-3.29 (m, 1H), 3.22-3.16 (m, 1H), 2.81 (t, *J* = 8.2 Hz, 2H), 2.51-2.45 (m, 2H), 2.06 (s, 3 H), 2.01 (s, 3 H), 2.00 (s, 3 H), 1.93 (s, 3 H), 1.57-1.51 (m, 4H), 1.48 (t, *J* = 7.0 Hz, 2H) 1.37-1.29 (m, 4H). HRMS (ESI) calcd for C<sub>23</sub>H<sub>38</sub>N<sub>2</sub>O<sub>10</sub>S [M+H]<sup>+</sup>: 535.2325, found 535.2314.

### **Compound 27.**

Compound **26** in MeOH was mixed with NaOMe and the resulting solution was stirred under nitrogen at rt for 2 h. The mixture was neutralized by IR-120, and then filtered, and concentrated to dryness *in vacuo* to yield **27** (92 mg, quant.) <sup>1</sup>H NMR (600 MHz, MeOD) δ 4.38 (d, *J* = 9.2 Hz, 1H), 3.90-3.86 (m, 2H), 3.68 (dd, *J* = 12.9, 5.9 Hz, 1H), 3.65-3.62 (m, 1H), 3.48-3.43 (m, 2H), 3.28-3.24 (m, 1H), 3.20-3.14 (m, 2H), 2.94 (t, *J* = 7.3 Hz, 1H), 2.73 (t, *J* = 7.3 Hz, 1H), 2.59 (t, *J* = 7.3 Hz, 1H), 2.47 (t, *J* = 7.3 Hz, 1H), 1.97 (s, 3 H), 1.56-1.48 (m, 4H), 1.39-1.35 (m, 4H). <sup>13</sup>C NMR (150 MHz, MeOD): δ 173.70, 169.75, 102.74, 77.92, 76.07, 70.50, 62.76, 57.35, 41.02, 40.32, 36.45, 35.19, 30.49, 27.66, 26.73, 23.03. HRMS (ESI) calcd for C<sub>17</sub>H<sub>32</sub>N<sub>2</sub>O<sub>17</sub>S [M+H]<sup>+</sup>: 409.2008, found 409.2017.

**Preparation of  $9^{\text{Am}}\text{Neu5Ac-}\alpha 2,3\text{-SCT 30}$ ,  $9^{\text{Am}}\text{Neu5Ac-}\alpha 2,6\text{-SCT 31}$  and  $\text{Neu5Ac-}\alpha 2,3\text{-SCT 38}$ .**

30 mg sialylglycopeptide (SGP) was digested by Endo-S WT (300  $\mu\text{g}$ ) in Tris-HCl buffer at 37°C for 48 h, and the product was purified by Sephadex G-25 gel filtration chromatography, and analyzed by ESI-MS to give SCT compound **28**.<sup>12</sup> Neuraminidase (5 U/ml, 12  $\mu\text{L}$ ) in Tris-HCl buffer was mixed with **29** at 37°C for 12 h, and purified by Sephadex G-25 gel filtration chromatography to give desialylated N-glycan **29**. After that, the reaction was carried out in 0.5 mL of HEPES buffer (50 mM, pH 8.5) containing 100 mM of  $9^{\text{Am}}\text{Neu5Ac}$  (14.5 mg, 47  $\mu\text{mol}$ ), 110 mM of CTP (27.2 mg, 52  $\mu\text{mol}$ ), and 20 mM of  $\text{MgCl}_2$ . The pH of reaction mixture was adjusted to 8.5 by adding 2N NaOH. Then, 0.5 mg/mL of NmCSS was added to the above solution. The resulting mixture was incubated at 37 °C for 8 h and the formation of CMP- $9^{\text{Am}}\text{Neu5Ac}$  was monitored by TLC analysis. To prepare  $9^{\text{Am}}\text{Neu5Ac-}\alpha 2,6\text{-SCT}$ , hST6Gal-I (0.5 mg/mL) was added to a reaction mixture of  $9^{\text{Am}}\text{Neu5Ac}$  and N-glycan and incubated at 37 °C according to the procedure described.<sup>13</sup> For  $9^{\text{Am}}\text{Neu5Ac-}\alpha 2,3\text{-SCT}$ , PmST3 (0.3 mg/mL) was added to the  $9^{\text{Am}}\text{Neu5Ac}$  reaction mixture with N-glycan and incubated at 37 °C. For  $\text{Neu5Ac-}\alpha 2,3\text{-SCT}$ , PmST3 (0.3 mg/mL) was added to the  $\text{Neu5Ac}$  reaction mixture with N-glycan and incubated at 37 °C. The reactions above were monitored by mass spectrometry analysis and TLC. After the acceptor was consumed, the reaction mixture was centrifuged, and the supernatant was subjected to a centrifuge filter with molecular mass cutoff 10 kDa (Amicon Ultra, Millipore) to remove proteins. The filtrate was purified with P-2 gel filtration chromatography to give  $9^{\text{Am}}\text{Neu5Ac-}\alpha 2,3\text{-SCT 30}$ ,  $9^{\text{Am}}\text{Neu5Ac-}\alpha 2,6\text{-SCT 31}$  and  $\text{Neu5Ac-}\alpha 2,3\text{-SCT 38}$ .

**Preparation of  $9^{\text{BPC}}\text{Neu5Ac-}\alpha 2,6\text{-SCT-SH 34}$ ,  $9^{\text{TCC}}\text{Neu5Ac-}\alpha 2,3\text{-SCT-SH 37}$  and  $\text{Neu5Ac-}\alpha 2,3\text{-SCT-SH 39}$ .**

$9^{\text{Am}}\text{Neu5Ac-}\alpha 2,6\text{-SCT}$  and DIEA (5.0 eq) were dissolved in  $\text{H}_2\text{O}$ , followed by addition of biphenyl carboxylic acid-N-hydrozysuccinimide ester (BPC-NHS) (3 eq) in THF. The reaction was stirred at 0 °C until the starting material was consumed. Then the reaction was purified by Sep-Pak C18 column (2 g, Waters Corp.) and eluted with  $\text{H}_2\text{O}$ -MeOH to give compound **32** in 91% yield.  $9^{\text{Am}}\text{Neu5Ac-}\alpha 2,3\text{-SCT}$  was prepared similarly as described above by stirring with 4H-thieno[3,2-c]chromene-2-carbamoyl-NHS (TCC-NHS) in THF and  $\text{H}_2\text{O}$  to give compound **35**. After purification, the product was obtained in 91% yield.

To a mixture of  $9^{\text{BPC}}\text{Neu5Ac-}\alpha 2,6\text{-SCT}$  in water was added CDMBI and TEA and the mixture was incubated at 4°C for 1 h<sup>12</sup> to generate the corresponding oxazoline N-glycan **33**, which was purified by Sephadex G-25 gel filtration chromatography and

characterized by ESI-MS. GlcNAc-SH **27** (0.25 mg) and Endo-M (N175Q) (1.6 U/mL) were added to a solution of 50 mM phosphate buffer (pH 7) with  $9^{\text{BPC}}$ Neu5Ac- $\alpha$ 2,6-SCT-oxazoline and the mixture was incubated at 30 °C for 30 min. The transglycosylation products was isolated by P-2 gel filtration chromatography to give compound **34** and characterized by ESI-MS.  $9^{\text{TCC}}$ Neu5Ac- $\alpha$ 2,3-SCT-SH **37** and Neu5Ac- $\alpha$ 2,3-SCT-SH **39** were prepared similarly as described above.

**$9^{\text{BPC}}$ Neu5Ac- $\alpha$  2,6-SCT-SH 34.**

$^1\text{H}$  NMR (600 MHz, DMSO- $d_6$ ):  $\delta$  = 8.33 (s, 3H, NH), 8.00 (d,  $J$  = 8.6 Hz, 4H), 7.72 (dd,  $J$  = 8.0, 14.2 Hz, 9H), 7.49 (t,  $J$  = 8.3 Hz, 4H), 7.40 (t,  $J$  = 8.3 Hz, 2H), 4.98-4.95 (m, 2H), 4.76 (s, 1H), 4.54 (s, 1H), 4.44-4.39 (m, 2H), 4.25-4.22 (m, 3H), 3.99 (s, 1H), 3.87 (s, 1H), 3.83-3.73 (m, 5H), 3.41-3.25 (m, 58H), 3.21 – 3.16 (m, 3H), 3.11 – 2.99 (m, 4H), 2.87 (t,  $J$  = 6.9 Hz, 2H), 2.61 (d,  $J$  = 8.4 Hz, 2H), 2.44 (t,  $J$  = 7.4 Hz, 2H), 1.91-1.77 (m, 18H), 1.44 (t,  $J$  = 6.9 Hz, 2H), 1.39-1.28 (m, 4H), 1.28-1.19 (m, 4H), 1.12 (t,  $J$  = 6.9 Hz, 1H). HRMS (ESI) calcd for  $\text{C}_{119}\text{H}_{171}\text{N}_9\text{O}_{63}\text{S}^{2-}$  [M-2H] $^{2-}$ : 1383.0093, found 1383.0026.

**$9^{\text{TCC}}$ Neu5Ac- $\alpha$ 2,3-SCT-SH 37.**

$^1\text{H}$  NMR (600 MHz, DMSO- $d_6$ ):  $\delta$  = 8.22 (s, 3H, NH), 8.10-8.09 (m, 1H, NH), 7.96-7.93 (m, 1H, NH), 7.81-7.79 (m, 1H, NH), 7.74-7.72 (m, 1H, NH), 7.35 (d,  $J$  = 7.8 Hz, 2H), 7.29 (s, 2H), 7.20 (t,  $J$  = 7.8 Hz, 2H), 6.97 (t,  $J$  = 7.8 Hz, 2H), 6.92 (d,  $J$  = 7.9 Hz, 2H), 5.29 (s, 4H), 5.01-4.95 (m, 2H), 4.77 (s, 1H), 4.54 (s, 1H), 4.44-4.36 (m, 2H), 4.27-4.19 (m, 3H), 3.99 (s, 1H), 3.88 (s, 1H), 3.85-3.71 (m, 3H), 3.50-3.22 (m, 52H), 3.19 (d,  $J$  = 9.5 Hz, 2H), 3.10-3.00 (m, 4H), 2.87 (t,  $J$  = 6.9 Hz, 2H), 2.64 – 2.58 (m, 2H), 2.44 (t,  $J$  = 7.4 Hz, 2H), 1.93-1.78 (m, 18H), 1.45-1.39 (m, 2H), 1.39-1.29 (m, 4H), 1.28-1.20 (m, 4H), 1.16 (t,  $J$  = 6.9 Hz, 1H). HRMS (ESI) calcd for  $\text{C}_{117}\text{H}_{169}\text{N}_9\text{O}_{65}\text{S}_3^{2-}$  [M-2H] $^{2-}$ : 1416.9606, found 1416.9623.

**Neu5Ac- $\alpha$ 2,3-SCT-SH 39.**

$^1\text{H}$  NMR (600 MHz, DMSO- $d_6$ ):  $\delta$  = 8.33 (s, 3H, NH), 8.10 (s, 1H, NH), 7.96-7.94 (m, 1H, NH), 7.81-7.80 (m, 1H, NH), 7.74-7.73 (m, 1H, NH), 4.98-4.95 (m, 2H), 4.76-4.75 (m, 1H), 4.54 (s, 1H), 4.46-4.38 (m, 2H), 4.25-4.22 (m, 3H), 3.99 (s, 1H), 3.87 (s, 1H), 3.80-3.71 (m, 4H), 3.41-3.25 (m, 59H), 3.23 – 3.18 (m, 3H), 3.08 – 3.01 (m, 3H), 2.87 (t,  $J$  = 6.9 Hz, 2H), 2.63-2.60 (m, 2H), 2.44 (t,  $J$  = 7.4 Hz, 2H), 1.87-1.79 (m, 18H), 1.44 (t,  $J$  = 6.9 Hz, 2H), 1.39-1.28 (m, 4H), 1.28-1.19 (m, 4H), 1.07 (t,  $J$  = 6.9 Hz, 1H). HRMS (ESI) calcd for  $\text{C}_{93}\text{H}_{153}\text{N}_7\text{O}_{63}\text{S}^{2-}$  [M-2H] $^{2-}$ : 1203.9357, found 1203.9367.

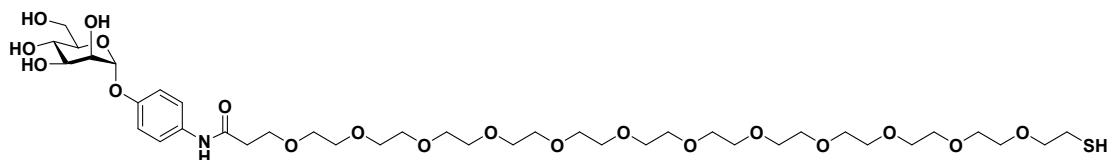

### Compound 40.

To a solution of compound **15** (0.12 mmol) in DMF (1 mL) was added EDC (0.12 mmol), HOBT (0.12 mmol), DMAP(0.12 mmol), trimethylamine (0.2 mmol), and CT(PEG)<sub>12</sub> (0.1 mmol), and the mixture was stirred under nitrogen at rt for 12 h, then concentrated to dryness *in vacuo*, and purified by column chromatography on silica gel to yield **40** (59%). <sup>1</sup>H NMR (600 MHz, MeOD): δ 6.93 (d, *J* = 8.6 Hz, 2H), 6.71 (d, *J* = 8.6 Hz, 2H), 5.3 (s, 1H), 4.00-3.99 (m, 1H), 3.89-3.88 (m, 1H), 3.81-3.70 (m, 5H), 3.70-3.59 (m, 48H), 2.68 (t, *J* = 6.8 Hz, 2H), 2.50-2.47 (m, 2H). <sup>13</sup>C NMR (150 MHz, MeOD): δ 170.17, 151.03, 143.50, 119.26(x2), 117.82(x2), 101.36, 75.10, 74.08, 72.45, 72.19, 71.45, 71.41, 71.37, 71.30, 71.24, 71.11, 70.93(x18), 68.43, 62.68, 24.67. HRMS (ESI) calcd for C<sub>39</sub>H<sub>70</sub>NO<sub>19</sub>S [M+H]<sup>+</sup>: 888.4263, found 888.4257.

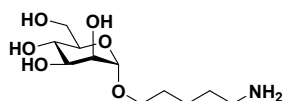

**Compound 40, 4** was synthesized according to our published procedure<sup>14</sup>.

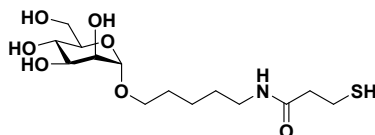

**Compound 43.** To a solution of **42** (0.24 mmol) in DMF (2 mL) was added EDC (0.24 mmol), HOBT (0.24 mmol), trimethylamine (0.4 mmol), and 3-mercaptopropionic acid (0.2 mmol), and the mixture was stirred under nitrogen at rt for 2 h, then concentrated to dryness *in vacuo*, and purified by column chromatography on silica gel (MeOH/DCM 1:3) to yield **16** (81%). <sup>1</sup>H NMR (600 MHz, MeOD) δ 4.91 (s, 1H), 3.84 (dd, *J* = 3.4, 1.8 Hz, 1H), 3.82-3.76 (m, 2H), 3.75-3.67 (m, 2H), 3.62 (m, 1H), 3.56-3.41 (m, 2H), 2.94 (t, *J* = 7.0 Hz, 2H), 2.70 (t, *J* = 7.2 Hz, 2H), 2.48 (t, *J* = 7.2 Hz, 2H). HRMS (ESI) calcd for C<sub>14</sub>H<sub>28</sub>NO<sub>7</sub>S [M+H]<sup>+</sup>: 354.1586, found 354.1602.

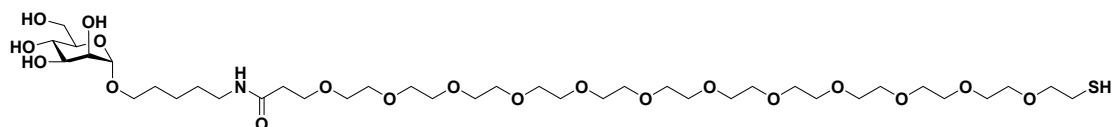

**Compound 44.** To a solution of **42** (0.12 mmol) in DMF (1 mL) was added EDC (0.12



mmol), HOBt (0.12 mmol), trimethylamine (0.2 mmol), and CT(PEG)<sub>12</sub> (0.1 mmol), and the mixture was stirred under nitrogen at rt for 12 h, then concentrated to dryness *in vacuo*, and purified by column chromatography on silica gel to yield **44** (62%). <sup>1</sup>H NMR (600 MHz, D<sub>2</sub>O): δ 4.77 (d, *J* = 8.6 Hz, 2H), 3.85-3.82 (m, 1H), 3.81-3.77 (m, 1H), 3.69-3.67 (m, 1H), 3.66-3.64 (m, 2H), 3.63-3.57 (m, 4H), 3.55-3.45 (m, 4H), 2.88 (t, *J* = 6.8 Hz, 2H), 2.57 (t, *J* = 7.2 Hz, 2H), 2.37 (t, *J* = 7.2 Hz, 2H), 1.66-1.51 (m, 4H), 1.40-1.31 (m, 2H). <sup>13</sup>C NMR (150 MHz, D<sub>2</sub>O): δ 171.01, 99.62, 72.72, 70.57, 69.99, 69.24 (x22), 69.04, 67.90, 67.39, 66.73, 60.92, 39.36, 37.57, 27.96, 26.70, 22.91, 22.43. HRMS (ESI) calcd for C<sub>38</sub>H<sub>76</sub>NO<sub>19</sub>S [M+H]<sup>+</sup>: 882.4732, found 882.4750.

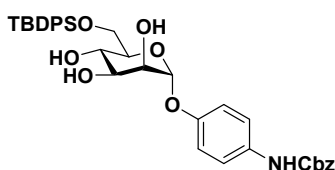

**Compound 45.** To a solution of **15b** (5 mmol) in MeOH was added NaOMe (0.2 eq) and the resulting mixture was stirred under nitrogen at rt for 2 h. The mixture was neutralized by IR-120, filtered, and concentrated to dryness *in vacuo*. It was then dissolved in anhydrous DCM (40 mL) and treated with imidazole (7.5 mmol) at 0 °C, followed by addition of TBDPSCI (5.5 mmol). The mixture was stirred at room temperature for 2.5 h under nitrogen then quenched by addition of MeOH. After stirring at room temperature for 10 min, the solvent was removed under reduced pressure to give a dry residue that was purified by column chromatography with MeOH/DCM (1/10) to give compound **45** (75%). <sup>1</sup>H NMR (600 MHz, CDCl<sub>3</sub>) δ 7.61 (m, 4H), 7.41-7.29 (m, 11H), 7.23-7.18 (m, 2H), 6.92 (d, *J* = 9.3 Hz, 2H), 5.41 (s, 1H), 5.16 (s, 2H), 4.09 (s, 1H), 4.02-4.00 (dd, *J* = 9.3, 3.4 Hz, 1H), 3.91 (t, *J* = 9.3 Hz, 1H), 3.85 (d, *J* = 5.1 Hz, 2H), 3.72-3.69 (m, 1H), 1.01, (s, 9H). <sup>13</sup>C NMR (150 MHz, CDCl<sub>3</sub>): 162.61, 135.64(x4), 135.54(x4), 132.73, 129.95(x4), 128.64(x4), 128.38, 128.33, 127.84(x2), 127.81(x2), 98.09, 71.41, 71.22, 70.22, 70.13, 64.89, 36.53, 31.48, 26.83(x3), 19.19. HRMS (ESI) calcd for C<sub>36</sub>H<sub>42</sub>NO<sub>8</sub>Si [M+H]<sup>+</sup>: 644.2680, found 644.2699.

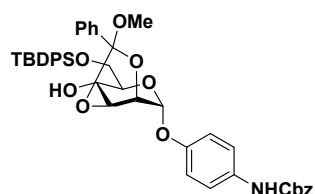

**Compound 46.** To a solution of **45** (3 mmol) and a catalytic amount of CSA (0.3 mmol) in CH<sub>3</sub>CN (60 mL) was added trimethyl orthobenzoate (9 mmol) at room temperature

under atmospheric pressure of nitrogen. The mixture was stirred for 30 min, then quenched by Et<sub>3</sub>N, dried under reduced pressure and purified by column chromatography with EA/Hex (1/2) to give **46** (81%). <sup>1</sup>H NMR (600 MHz, CDCl<sub>3</sub>) δ 7.65-7.59 (m, 2H), 7.57-7.52 (m, 4H), 7.41-7.27 (m, 14H), 7.26-7.20 (m, 2H), 6.93 (d, *J* = 9.2 Hz, 2H), 5.77 (s, 1H), 5.17 (s, 2H), 4.70 (d, *J* = 6.1 Hz, 1H), 4.58 (dd, *J* = 9.3, 3.4 Hz, 1H), 3.79-3.76 (m, 2H), 3.74-3.70 (m, 1H), 3.69-3.66 (m, 1H), 3.22 (s, 3H), 2.53 (d, *J* = 3.9 Hz, 1H), 0.93, (s, 9H). <sup>13</sup>C NMR (150 MHz, CDCl<sub>3</sub>): 171.23, 153.49, 152.24, 137.09, 136.09, 135.68(x4), 135.48(x4), 132.98, 132.72, 129.86, 129.84(x2), 129.18, 128.65(x2), 128.39, 128.37, 128.34, 127.78(x2), 127.71(x2), 126.23, 121.11, 117.18, 95.69, 79.52, 69.57, 69.45, 67.03, 63.75, 60.44, 51.16, 26.76(x3), 19.15, 14.22. HRMS (ESI) calcd for C<sub>44</sub>H<sub>48</sub>NO<sub>9</sub>Si [M+H]<sup>+</sup>:762.3098, found 762.3072.

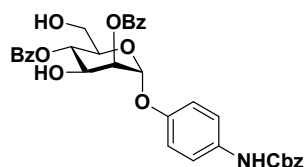

**Compound 47.** Compound **46** (2 mmol) was dissolved in DCM (20 mL) and sequentially mixed with DIPEA (6 mmol), benzoic anhydride (4 mmol) and DMAP (0.2 mmol). After stirring for 30 min, the mixture was evaporated under reduced pressure to give a dry residue and then poured into EA (20 mL) and 2 N HCl (20 mL) with vigorous stirring for 30 min. The solvent was removed by evaporation, followed by extraction with EA and the collected organic layer was washed with ice-cold saturated NaHCO<sub>3</sub>(aq), water and brine, and dried over MgSO<sub>4</sub>. The filtrate was evaporated under reduced pressure and redissolved in THF (20 mL) and AcOH (4 mmol) and 1 M TBAF (2.4 mmol in THF) were added at 0 °C. The resulting mixture was warmed up to room temperature gradually, stirred for another 2 h, and then diluted with EA. The organic layer was washed with saturated NaHCO<sub>3</sub>(aq), water and brine, dried with anhydrous MgSO<sub>4</sub>, and concentrated under reduced pressure. The dry residue was purified by column chromatography with EA/Hex (1/2) to give compound **47** (65%). <sup>1</sup>H NMR (600 MHz, CDCl<sub>3</sub>) δ 8.10-8.05 (m, 4H), 7.61-7.56 (m, 2H), 7.48-7.41 (m, 4H), 7.39-7.27 (m, 7H), 7.03 (d, *J* = 9.2 Hz, 2H), 5.69 (s, 1H), 5.62-5.55 (m, 2H), 5.16, (s, 2H), 4.62 (dd, *J* = 9.3, 3.4 Hz, 1H), 4.06-4.01 (m, 1H), 3.76-3.67 (m, 2H). <sup>13</sup>C NMR (150 MHz, CDCl<sub>3</sub>): 167.42, 166.05, 153.55, 152.01, 136.03, 133.84, 133.76, 130.00 (x4), 129.09, 128.96, 128.69(x4), 128.65(x4), 128.62(x4), 128.34, 117.11 (x2), 96.18, 72.61, 71.30, 70.01, 68.53, 61.16. HRMS (ESI) calcd for C<sub>34</sub>H<sub>32</sub>NO<sub>10</sub> [M+H]<sup>+</sup>:614.2026, found 614.2038.

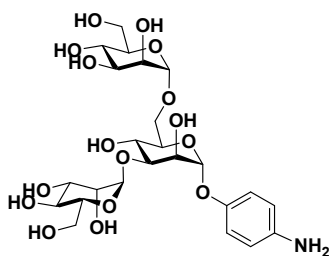

### Compound 48.

To a stirred mixture of **47** (0.2 mmol) and 4 Å molecular sieve (0.2 g) in anhydrous DCM (2 mL) at  $-40\text{ }^{\circ}\text{C}$  was added  $\text{BF}_3 \cdot \text{OEt}_2$  (0.02 mmol) dropwise. A solution of **15a** in anhydrous DCM was added dropwise to the above mixture and the mixture was stirred for 1 h at  $-40\text{ }^{\circ}\text{C}$ . The reaction mixture was gradually warmed to room temperature and stirred for another 1 h. The solution was quenched by adding triethylamine, then filtered, added sat.  $\text{NaHCO}_3$  aq. and extracted with DCM. The organic layer was dried with  $\text{MgSO}_4$  and evaporated to dryness. The residue was purified by flash column chromatography on silica gel to give the trisaccharide product. The product was then dissolved in MeOH and NaOMe (0.2 eq) was added and the resulting solution was stirred at rt for 2 h. The mixture was neutralized by IR-120, and then filtered, concentrated to dryness in vacuo. The deacetylated mixture was purified by Bio-Gel P-2 Gel (Biorad) with  $\text{H}_2\text{O}$  as eluent to obtain a pure trisaccharide. The compound was lyophilized and then dissolved in MeOH (2 mL), and 10% Pd-C (30 mg) was added with vigorous stirring under  $\text{H}_2$  atmosphere overnight. The solution was filtered by celite and concentrated to dryness to give compound **48** (42%).  $^1\text{H}$  NMR (600 MHz,  $\text{D}_2\text{O}$ )  $\delta$  7.03 (d,  $J = 9.2$  Hz, 2H), 6.88 (d,  $J = 9.2$  Hz, 2H), 5.48 (s, 1H), 5.19 (s, 1H), 4.76 (s, 1H), 4.32 (s, 1H), 4.14 (dd,  $J = 9.3, 3.0$  Hz, 1H), 4.11 (s, 1H), 3.95-3.63 (m, 15H).  $^{13}\text{C}$  NMR (150 MHz,  $\text{D}_2\text{O}$ ): 151.38, 143.39, 121.23, 120.70, 105.19, 101.60, 101.39, 80.93, 76.13, 75.38, 74.04, 73.27, 73.12, 72.79, 72.66, 72.22, 69.50, 69.41, 68.70, 67.90, 63.71, 63.65. HRMS (ESI) calcd for  $\text{C}_{24}\text{H}_{37}\text{NO}_{16}\text{Na}[\text{M}+\text{Na}]^+$ : 618.2010, found 618.2029.

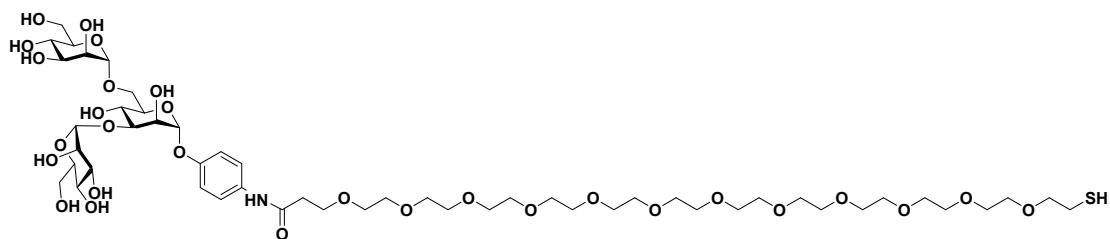

### Compound 49.

To a solution of **48** (0.12 mmol) in DMF (1 mL) was added EDC (0.12 mmol), HOBT (0.12 mmol), DMAP(0.12 mmol), trimethylamine (0.2 mmol), and CT(PEG)<sub>12</sub> (0.1 mmol), and the mixture was stirred under nitrogen at rt for 12 h. The mixture was concentrated to dryness *in vacuo*, and purified by Bio-Gel P-2 Gel with H<sub>2</sub>O as eluent to yield **49** (54%). <sup>1</sup>H NMR (600 MHz, D<sub>2</sub>O): 7.20 (d, *J* = 9.2 Hz, 2H), 7.13 (d, *J* = 9.2 Hz, 2H), 5.53 (s, 1H), 5.09 (s, 1H), 4.65 (s, 1H), 4.25 (s, 1H), 4.06 (dd, *J* = 9.3, 3.0 Hz, 1H), 4.01 (m, 1H), 3.83-3.67 (m, 11H), 3.61-3.56 (m, 52H), 2.64 (t, *J* = 6.4 Hz, 2H), 2.48 (t, *J* = 6.4 Hz, 2H). <sup>13</sup>C NMR (150 MHz, D<sub>2</sub>O): 178.06, 153.84, 149.84, 123.02, 118.11, 120.42, 98.8, 97.78, 78.05, 73.39, 72.61, 72.17, 71.47, 70.52, 70.35, 70.01, 69.85, 69.55, 69.38, 69.31, 69.17, 66.97, 66.74, 66.60, 65.82, 65.10, 60.96, 60.86, 35.82, 23.03. HRMS (ESI) calcd for C<sub>51</sub>H<sub>89</sub>NO<sub>29</sub>SNa[M+Na]<sup>+</sup>:1234.5139, found 1234.5133.

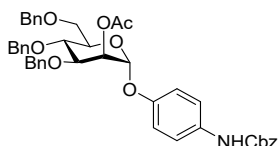

### Compound 51.

To a stirred solution of **50** (1 mmol) in anhydrous DCM (10 mL) was added trichloroacetonitrile and DBU and the solution was stirred for 2 h at rt. The solvent was removed and the residue was purified by flash column chromatography on silica gel to give the imidate product. To a stirred solution of benzyl (4-hydroxyphenyl)carbamate (1.2 mmol) and 4 Å molecular sieve (1 g) in anhydrous DCM (10 mL) was cooled to -40 °C and then BF<sub>3</sub>·OEt<sub>2</sub> (0.1 mmol) was added dropwise to the solution. A solution of the imidate donor (1 mmol) in anhydrous DCM was added dropwise to the above mixture and stirred for 1 h at -40 °C. After that, the reaction was gradually warmed to room temperature and stirred for another 1 h. The solution was quenched by adding triethylamine, then filtered, added sat. NaHCO<sub>3</sub> aq. and extracted with DCM. The organic layer was dried with MgSO<sub>4</sub> and evaporated to dryness. The residue was purified by flash column chromatography on silica gel to give compound **51** (72%). <sup>1</sup>H NMR (600 MHz, CDCl<sub>3</sub>) δ 7.40-7.28 (m, 18H), 7.19 (d, *J* = 7.9 Hz, 2H), 7.10 (d, *J* = 8.1 Hz, 2H), 7.00 (d, *J* = 8.1 Hz, 2H), 5.57-5.55 (m, 2H), 5.12 (s, 2H), 4.91 (d, *J* = 10.5 Hz, 1H), 4.80 (d, *J* = 10.5 Hz, 1H), 4.69 (d, *J* = 10.5 Hz, 1H), 4.65 (d, *J* = 10.5 Hz, 1H), 4.53 (d, *J* = 10.5 Hz, 1H), 4.46 (d, *J* = 10.5 Hz, 1H), 4.22 (dd, *J* = 9.4, 3.6 Hz, 1H), 4.07-4.04 (t, *J* = 9.7 Hz, 1H), 3.93 (d, *J* = 9.5 Hz, 1H), 3.83 (dd, *J* = 10.9, 3.9 Hz, 1H), 3.68 (d, *J* = 10.8 Hz, 1H), 2.21 (s, 3H). <sup>13</sup>C NMR (150 MHz, CDCl<sub>3</sub>):170.44, 156.25, 154.62, 138.27, 138.04, 137.82, 136.51, 132.71, 129.79, 128.50, 128.43, 128.31, 128.27, 128.10, 128.08, 127.83, 127.80, 127.64, 127.60, 116.63, 96.13, 77.95, 76.66, 75.22, 74.00, 73.34, 71.99, 71.92, 68.55, 68.5, 66.63, 21.09. HRMS (ESI) calcd for

C<sub>43</sub>H<sub>43</sub>NO<sub>10</sub> [M+H]<sup>+</sup>:718.3016, found 718.3041.

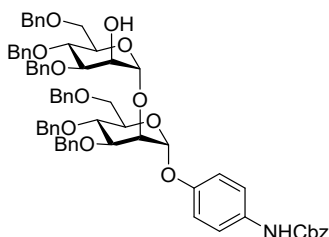

### Compound 52.

To a stirred solution of **51** (0.6 mmol) in MeOH was added NaOMe (0.1 eq) and the resulting solution was stirred at rt for 1 h. The mixture was neutralized by IR-120, and then filtered, concentrated to dryness in vacuo. The deacetylated product was then dissolved in anhydrous DCM (5 mL) with 4 Å molecular sieve (0.5 g) added. The solution was cooled to -40 °C and then BF<sub>3</sub>·OEt<sub>2</sub> (0.05 mmol) was added dropwise to the solution followed by a dropwise addition of the imidate donor (0.5 mmol) in anhydrous DCM to the above mixture with stirring for 1 h at -40°C. After that, the mixture was gradually warmed to room temperature and stirred for another 1 h, quenched by adding triethylamine, then filtered, added sat. NaHCO<sub>3</sub> aq. and extracted with DCM. The organic layer was dried with MgSO<sub>4</sub> and evaporated to dryness. The product was then dissolved in MeOH and NaOMe (0.1 eq) was added and the resulting solution was stirred at rt for 2 h. The mixture was neutralized by IR-120, and then filtered, concentrated to dryness in vacuo. The residue was purified by flash column chromatography on silica gel to give compound **52** (69%). <sup>1</sup>H NMR (600 MHz, CDCl<sub>3</sub>) δ 7.36-7.25 (m, 25H), 7.22-7.13 (m, 10H), 6.99-6.93 (m, 4H), 5.66 (s, 1H), 5.17 (s, 1H), 5.06 (s, 2H), 4.86 (d, *J* = 10.5 Hz, 1H), 4.79 (d, *J* = 10.5 Hz, 1H), 4.73, (s, 2H), 4.65 (d, *J* = 10.5 Hz, 1H), 4.58-4.57 (m, 2H), 4.55-4.52 (m, 2H), 4.47-4.43 (m, 3H), 4.19-4.14 (m, 2H), 3.99-3.96 (m, 2H), 3.88 (dd, *J* = 9.1, 3.1 Hz, 1H), 3.84-3.76 (m, 3H), 3.67-3.63 (m, 3H). <sup>13</sup>C NMR (150 MHz, CDCl<sub>3</sub>): 156.22, 154.70, 138.47, 138.35, 138.18, 138.14, 138.05, 137.90, 136.51, 132.30, 129.74, 129.63, 128.46, 128.44, 128.31, 128.28, 128.26, 128.19, 128.06, 127.93, 127.85, 127.83, 127.74, 127.68, 127.60, 127.54, 127.46, 127.38, 127.32, 116.63, 101.12, 96.95, 79.97, 79.42, 77.21, 77.00, 76.78, 75.12, 75.02, 74.66, 74.45, 74.33, 73.23, 73.16, 72.44, 72.41, 72.16, 71.69, 68.99, 68.45, 66.57. HRMS (ESI) calcd for C<sub>68</sub>H<sub>70</sub>NO<sub>13</sub> [M+H]<sup>+</sup>:1108.4847, found 1108.4819.

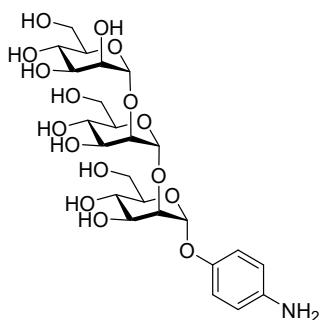

### Compound 53.

To a stirred solution of **52** (0.3 mmol) in anhydrous DCM (2.5 mL) was added 4 Å molecular sieve (0.25 g). The mixture was cooled to -40 °C and then  $\text{BF}_3 \cdot \text{OEt}_2$  (0.03 mmol) was added dropwise followed by a dropwise addition of the imidate donor (0.3 mmol) in anhydrous DCM with stirring for 1 h at -40 °C. After that, the reaction mixture was gradually warmed to room temperature and stirred for another 1 h, then quenched by adding triethylamine, filtered, added sat.  $\text{NaHCO}_3$  aq. and extracted with DCM. The organic layer was dried with  $\text{MgSO}_4$  and evaporated to dryness. The residue was purified by flash column chromatography on silica gel to give the trisaccharide product. The product was then dissolved in MeOH and NaOMe (0.1 eq) was added and the resulting solution was stirred at rt for 2 h. The mixture was neutralized by IR-120, and then filtered, concentrated to dryness in vacuo. The compound was then dissolved in MeOH (2 mL), and 10% Pd-C (30 mg) was added with vigorous stirring under  $\text{H}_2$  atmosphere overnight. The solution was filtered by celite and concentrated to dryness to give compound **53** (60%).  $^1\text{H}$  NMR (600 MHz,  $\text{D}_2\text{O}$ )  $\delta$  7.03 (d,  $J = 9.0$  Hz, 2H), 6.83 (d,  $J = 9.0$  Hz, 2H), 5.09 (s, 1H), 4.81 (s, 1H), 3.94-3.55 (m, 16H), 3.48 (t,  $J = 9.6$  Hz, 1H), 3.29-3.27 (m, 1H).  $^{13}\text{C}$  NMR (150 MHz,  $\text{D}_2\text{O}$ ): 151.36, 143.37, 121.20, 120.67, 101.59, 101.23, 96.33, 78.46, 75.34, 74.69, 73.51, 73.11, 72.97, 72.52, 71.53, 69.28, 69.14, 68.90, 65.51, 63.26, 62.91. HRMS (ESI) calcd for  $\text{C}_{24}\text{H}_{38}\text{NO}_{16}$   $[\text{M}+\text{H}]^+$ :596.2191, found 596.2044.

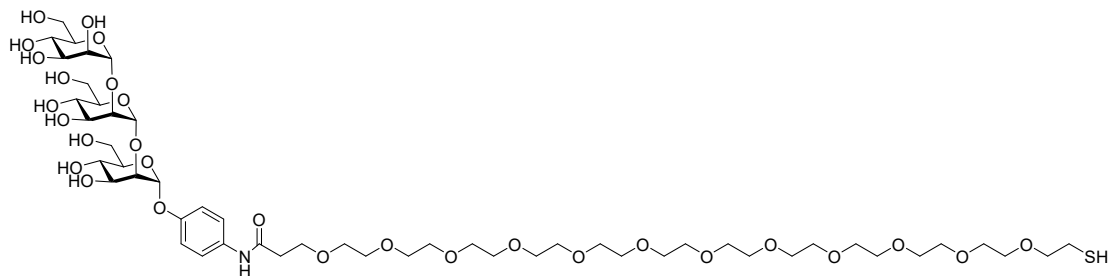

### Compound 54.

Compound **53** (0.02 mmol) in DMF (0.2 mL) was added EDC (0.02 mmol), HOBT (0.02 mmol), DMAP (0.02 mmol), trimethylamine (0.04 mmol), and CT(PEG)<sub>12</sub> (0.02 mmol),

and the resulting solution was stirred under nitrogen at rt for 12 h. The mixture was concentrated to dryness *in vacuo*, and the crude product was purified Bio-Gel P-2 Gel with H<sub>2</sub>O as eluent to yield **54** (58%). <sup>1</sup>H NMR (600 MHz, D<sub>2</sub>O): 7.03 (d, *J* = 9.2 Hz, 2H), 6.82 (d, *J* = 9.2 Hz, 2H), 5.09 (s, 1H), 4.81 (s, 1H), 3.84-3.46 (m, 65H), 3.30-3.26 (m, 1H), 2.65 (t, *J* = 6.5 Hz, 2H), 2.52 (s, 2H). <sup>13</sup>C NMR (150 MHz, D<sub>2</sub>O): 173.22, 151.36, 143.37, 121.37, 120.59, 101.20, 101.67, 97.04, 79.17, 76.06, 75.40, 75.22, 74.23, 73.69, 73.23, 72.60, 72.45, 72.22, 71.68, 71.21, 69.85, 69.61, 63.97, 38.52, 26.08. HRMS (ESI) calcd for C<sub>51</sub>H<sub>90</sub>NO<sub>29</sub>S[M+H]<sup>+</sup>: 1212.5319, found 1212.5314.

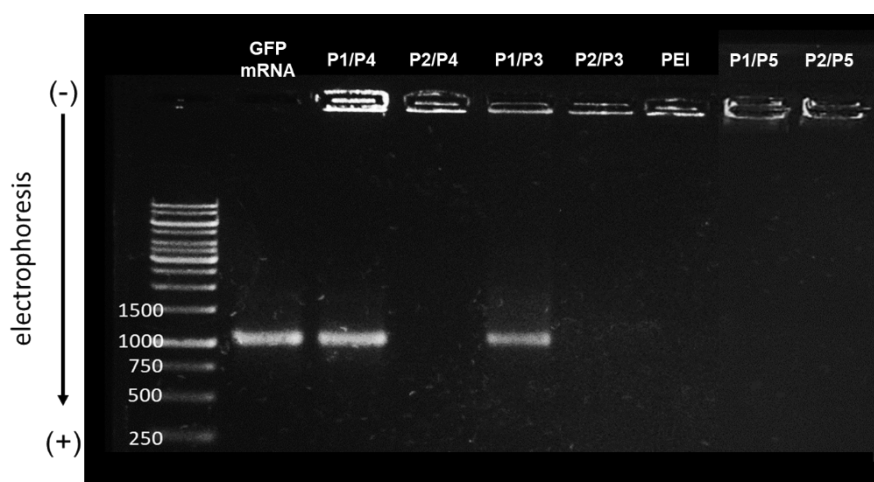

**Figure S1.** Agarose gel electrophoresis of GFP mRNA-copolymer (N/P ratio = 3:1).

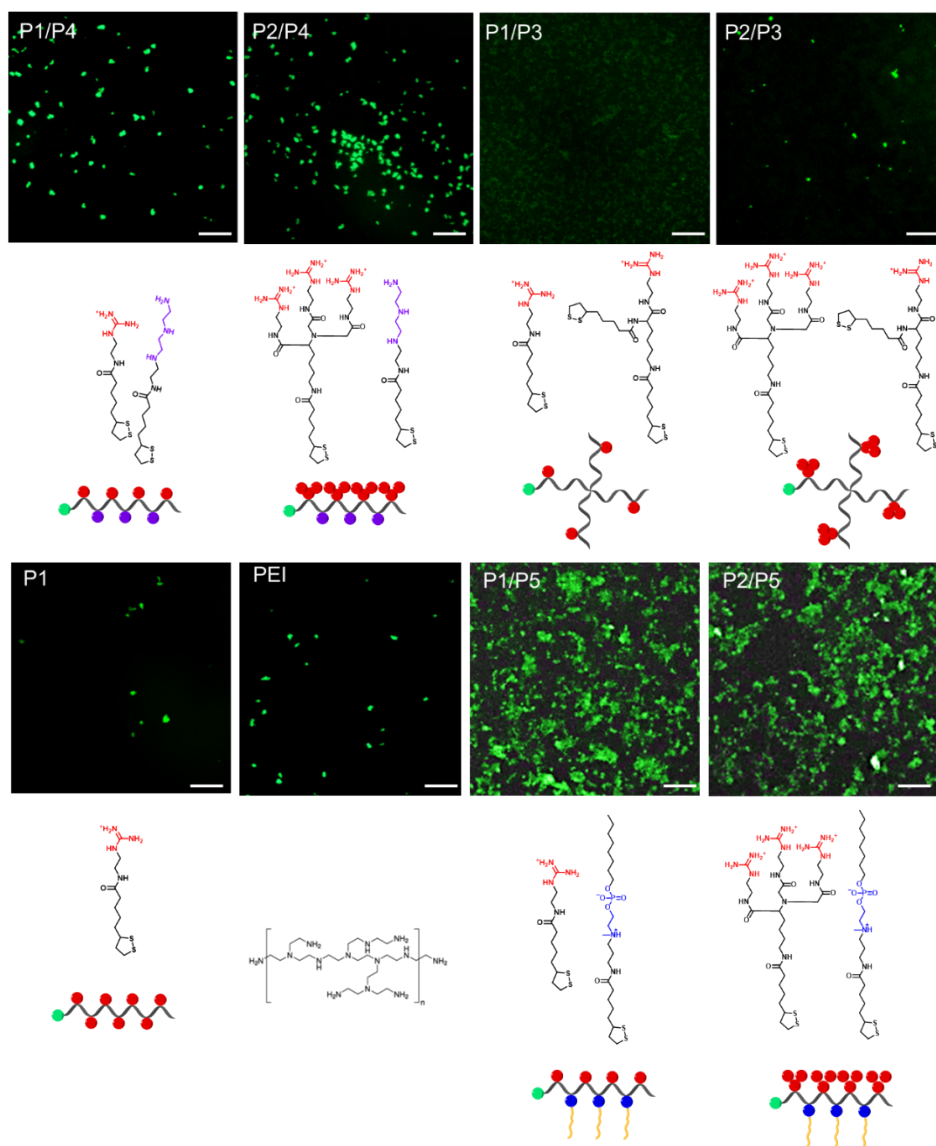

**Figure S2.** The polymers used in this study and the fluorescent image of GFP protein translated by GFP mRNA in HEK293T cells using different poly(disulfide)s for encapsulation are shown. GFP mRNA was encapsulated in **P1/P4**, **P2/P4**, **P1/P3**, **P2/P3**, **P1**, **PEI** (MW: 25kDa), **P1/P5**, or **P2/P5**. The scale bar represents 200  $\mu\text{m}$ .



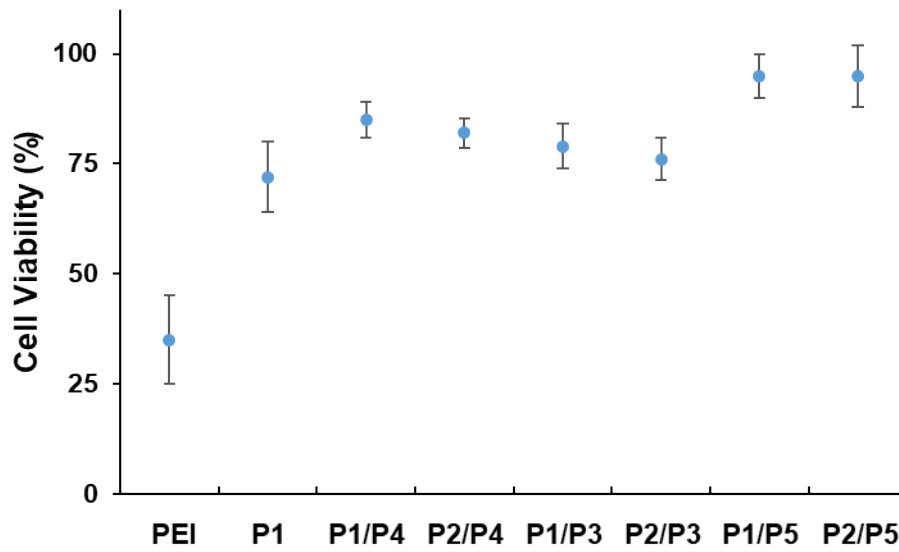

**Figure S3.** Viability of HEK293T cells evaluated by MTT assay after incubation of different mRNA-PNPs for 48 h. The N/P ratio of mRNA to **P<sub>x</sub>** was fixed at 3:1 and 1  $\mu\text{g}/\text{well}$  mRNA was used. Error bar represent the standard error (mean  $\pm$  S.D.,n=3)

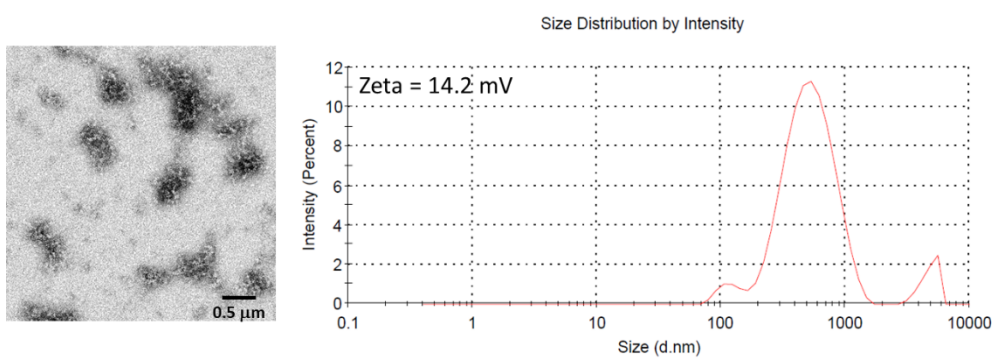

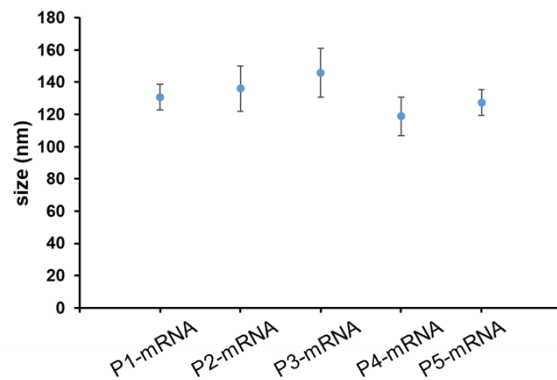

**Figure S4.** Size analysis of mRNA-PNP (**I1-P1**) measured by TEM and dynamic light scattering. Particle size of mRNA-PNP encapsulated in P1-P5 copolymers. Samples and experiments were maintained at 25 °C.

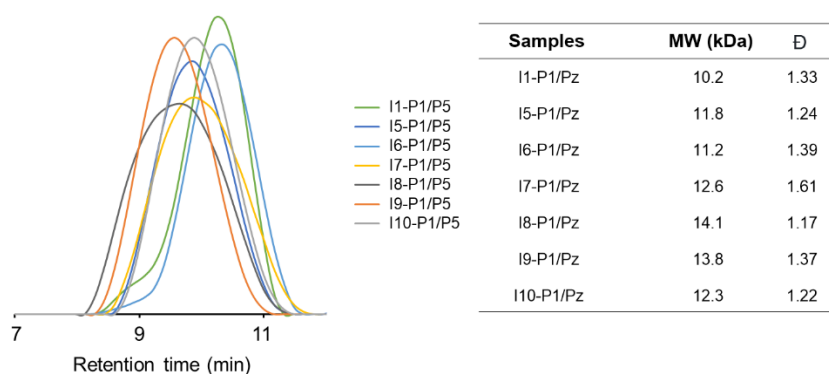

**Figure S5.** GPC characterization and determination of PDI and MW of synthesized polymers. The mobile phase was 30% ACN in 0.1 M acetate buffer (pH = 6.5) as the eluent with 0.4 mL min<sup>-1</sup> flow rate.

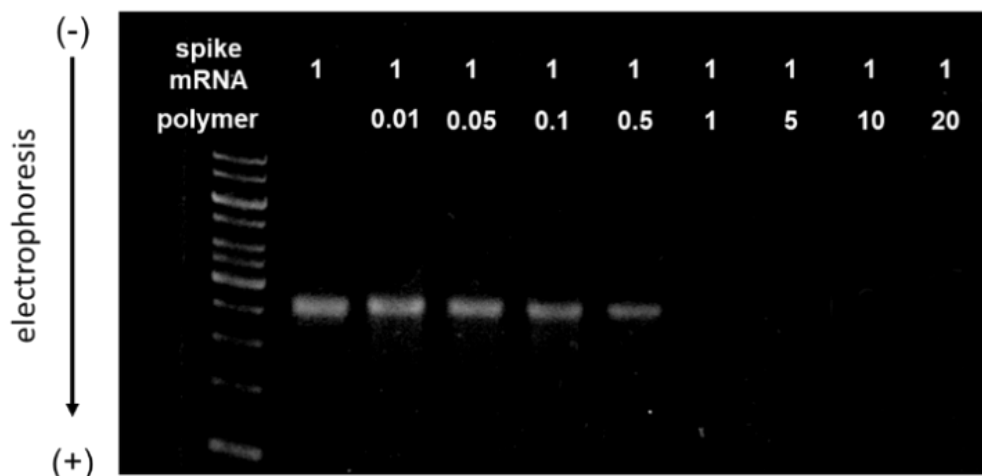

**Figure S6.** Agarose gel electrophoresis of spike mRNA-PNP at different N/P ratios, the ratio of positively-charged polymer amine (N = nitrogen) groups to negatively-charged nucleic acid phosphate (P) groups

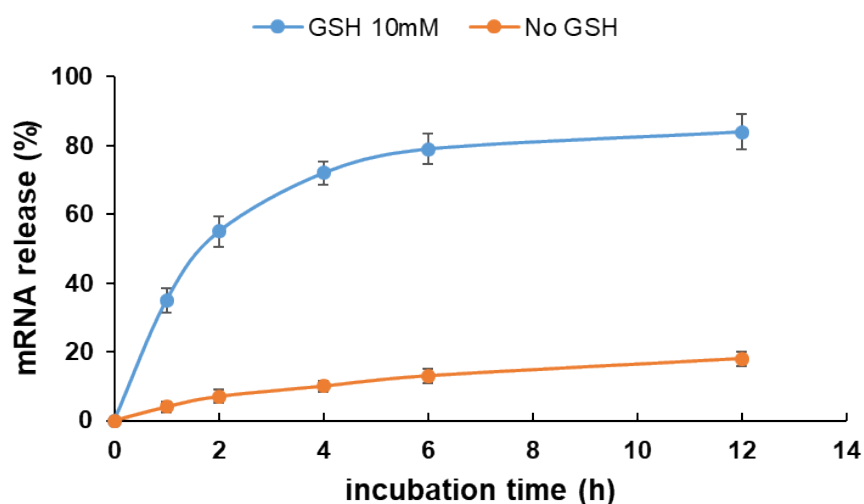

**Figure S7.** Detection of spike mRNA release from mRNA-PNP (I1-P1/P5) after addition of GSH (10 mM) in PBS buffer for 0-12 h. The released mRNA was determined by using Quant-iT™ RiboGreen™ RNA Reagent and Kit.

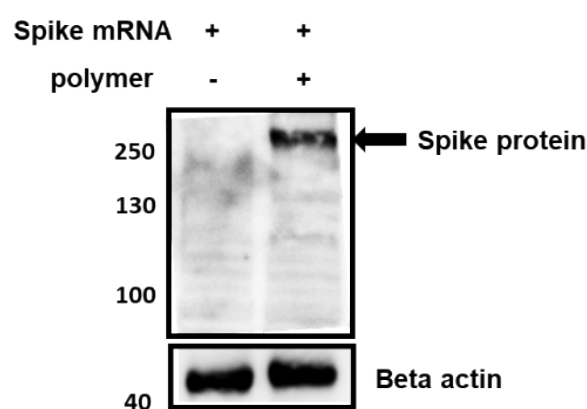

**Figure S8.** Chemiluminescent imaging of spike protein expression mediated by spike mRNA-PNP (I1-P1/P5) in HEK293T cells.

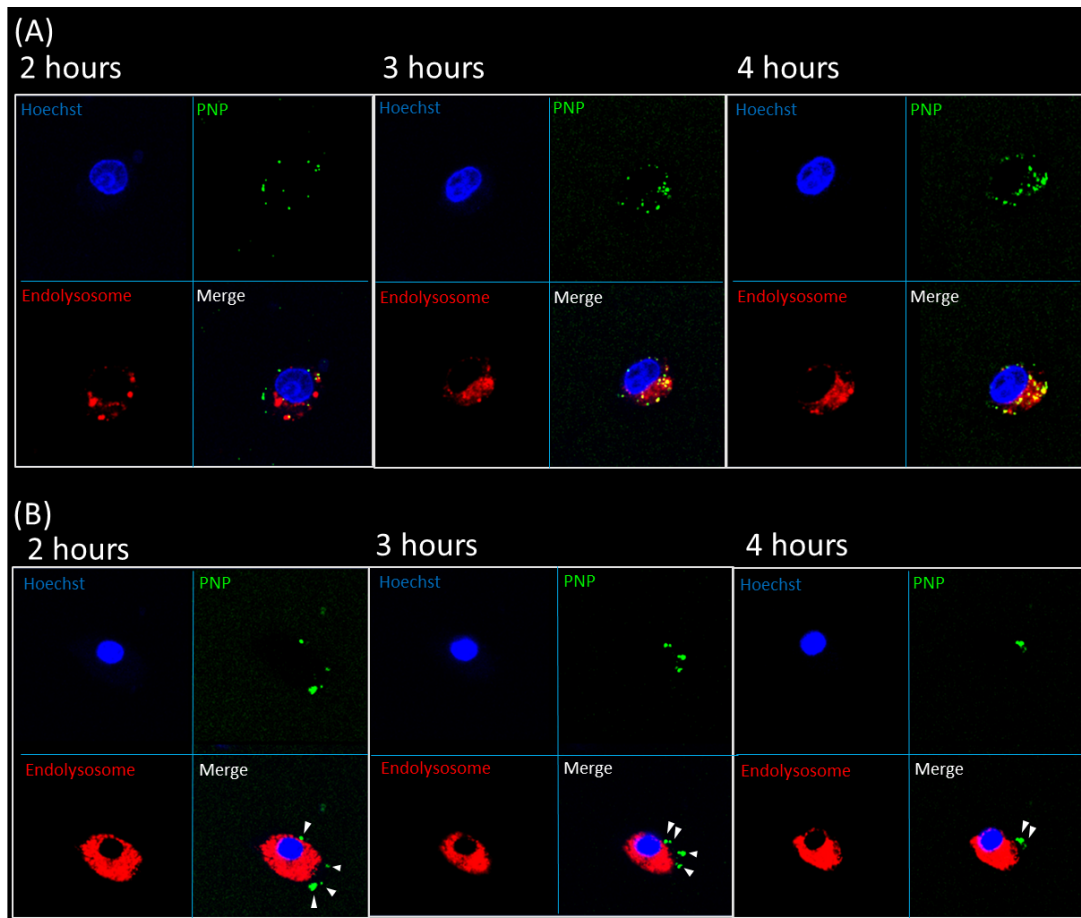

**Figure S9.** Endosomal escape and cellular uptake. Fluorescence images of dendritic cells treated with spike mRNA-PNP for 2-4 h. (A) mRNA-PNP (I1-P1/P4); (B) mRNA-PNP(I1-P1/P4/P5). FITC conjugated-mRNA-PNP (green), endo/lysosomes (red), and nuclei (blue) were shown. The white arrow indicated mRNA escape from endo/lysosomes. Endo/lysosomes were stained with lysotraker Deep Red ( $\lambda_{Ex}/\lambda_{Em} = 647/668$  nm), and nuclei was stained with Hoechst 33342 ( $\lambda_{Ex}/\lambda_{Em} = 350/461$  nm).

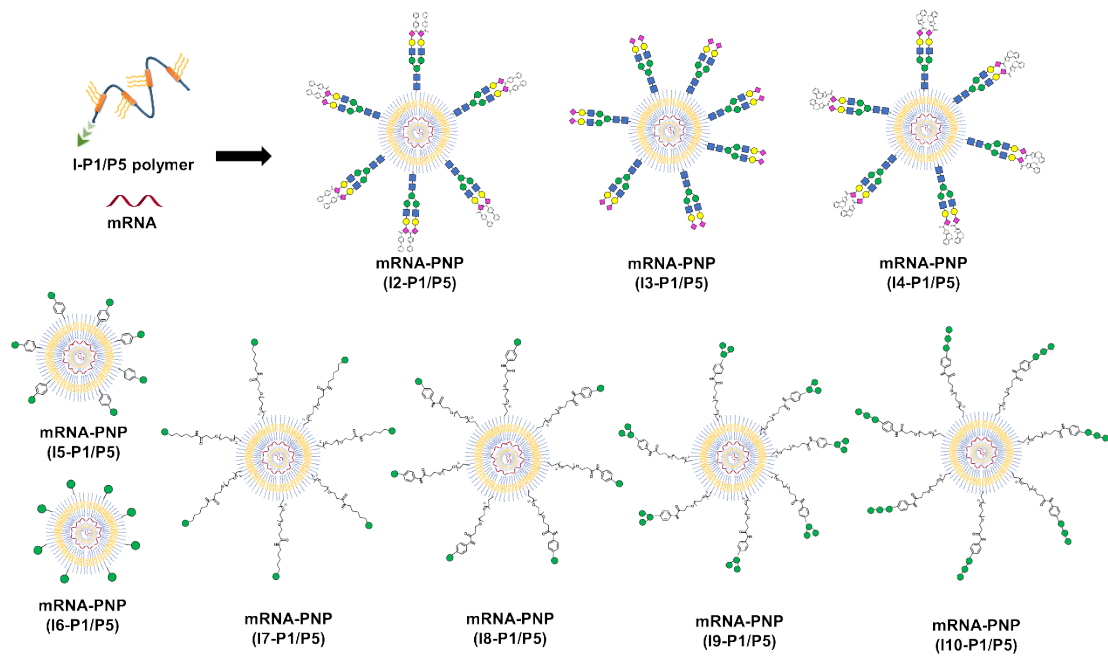

Figure S10. Schematic presentation of mRNA-PNPs generated from P1/P5 and glycan initiator I2-I10 for evaluation of selective delivery to dendritic cells.

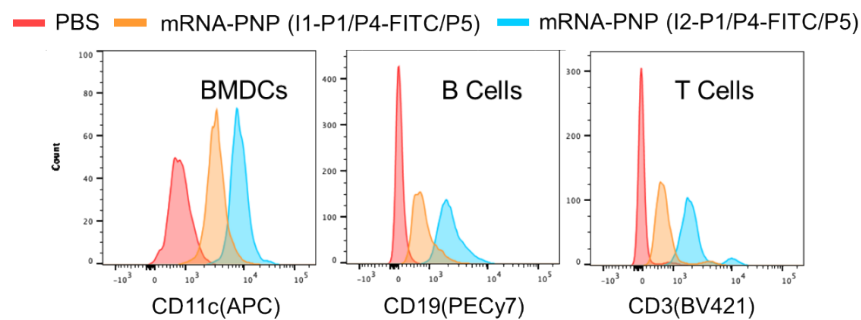

**Figure S11.** Flow cytometry analysis revealed increased uptake of Siglec-2-targeted mRNA-PNP (blue) by BMDCs, B cells, and T cells from mouse splenocytes compared to nontargeted mRNA-PNP (orange) with PBS as control (pink). Cellular uptake fluorescence signal of BMDC, B cells, and T cells were measured after incubation with spike mRNA-PNP (I1-P1/P4-FITC/P5) or (I2-P1/P4-FITC/P5) for 1 h.

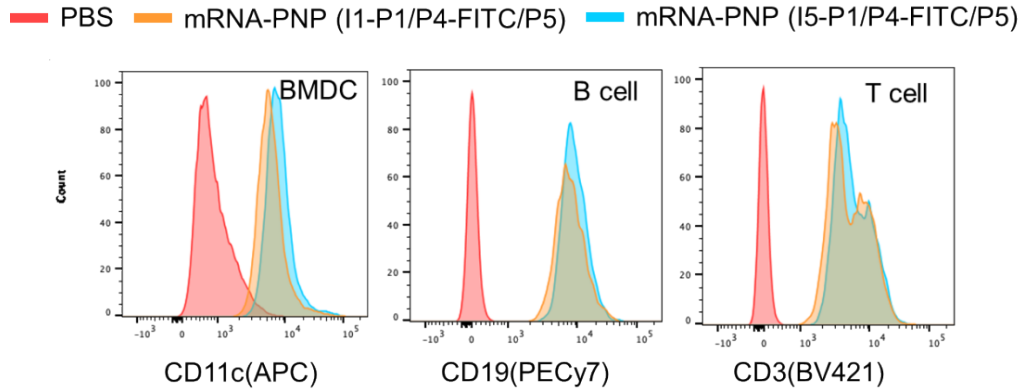

**Figure S12.** Flow cytometry analysis revealed increased uptake of DC-SIGN-targeted mRNA-PNP (blue) by BMDCs, B cells, and T cells from mouse splenocytes compared to non-targeted mRNA-PNP (orange) with PBS as control (pink). Cellular uptake of spike mRNA-PNP (I1-P1/P4-FITC/P5) or (I5-P1/P4-FITC/P5) after 1 h incubation with BMDC, B cells, and T cells and measured by fluorescence signal.

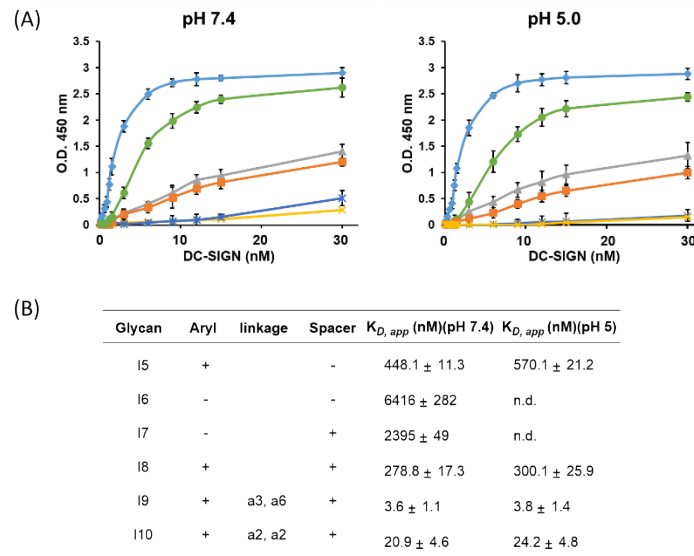

**Figure S13.** Enzyme-linked immunosorbent assay (ELISA) for determination of dissociation constants in binding to DC-SIGN ECD oriented surface at pH 7.4 and pH 5.0: mRNA-PNP (I5-P1/P5) (orange), mRNA-PNP (I6-P1/P5) (yellow), mRNA-PNP (I7-P1/P5) (indigo), mRNA-PNP (I8-P1/P5) (grey), mRNA-PNP (I9-P1/P5) (blue), and mRNA-PNP (I10-P1/P5) (green). The error bars represent standard error of the mean from three independent experiments.

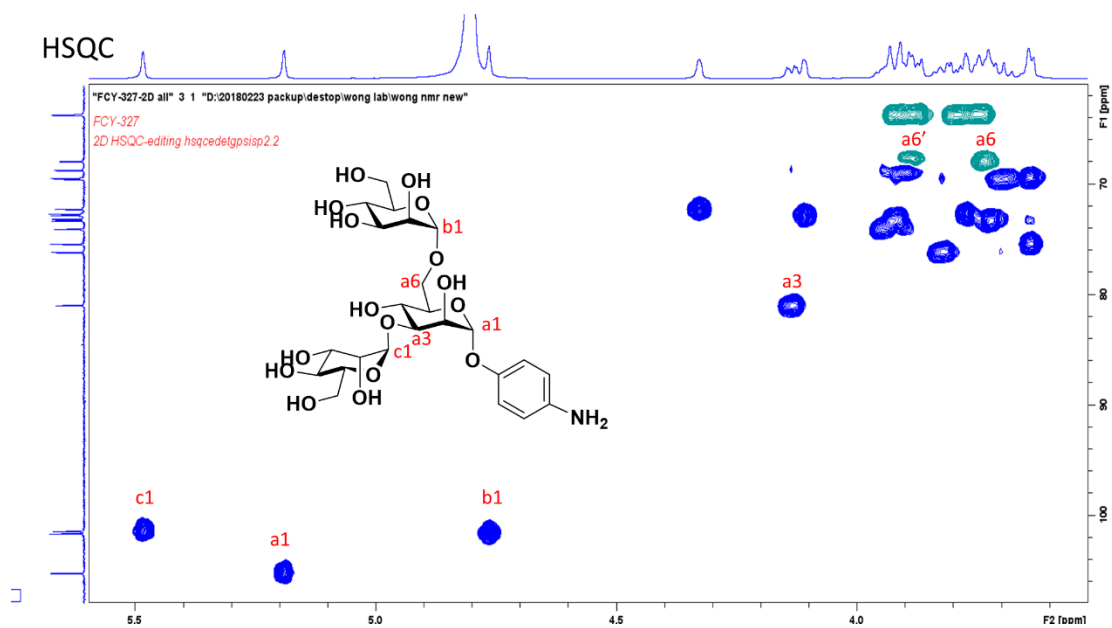

Figure S14. HSQC NMR spectrum of phenyltrimannose 48.

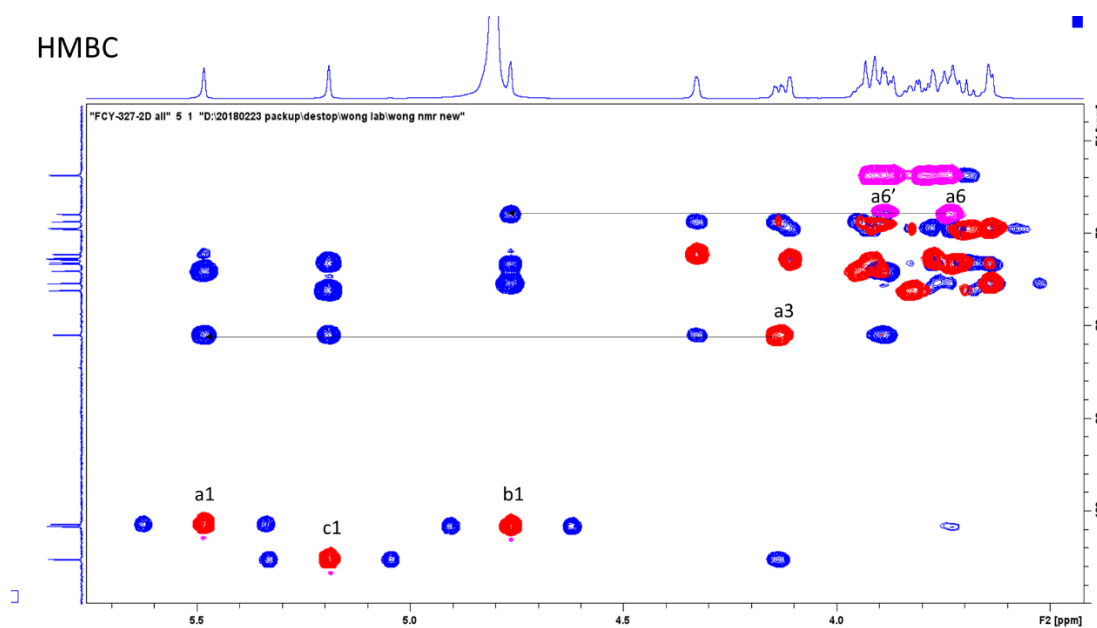

Figure S15. HMBC NMR spectrum of phenyltrimannose 48.

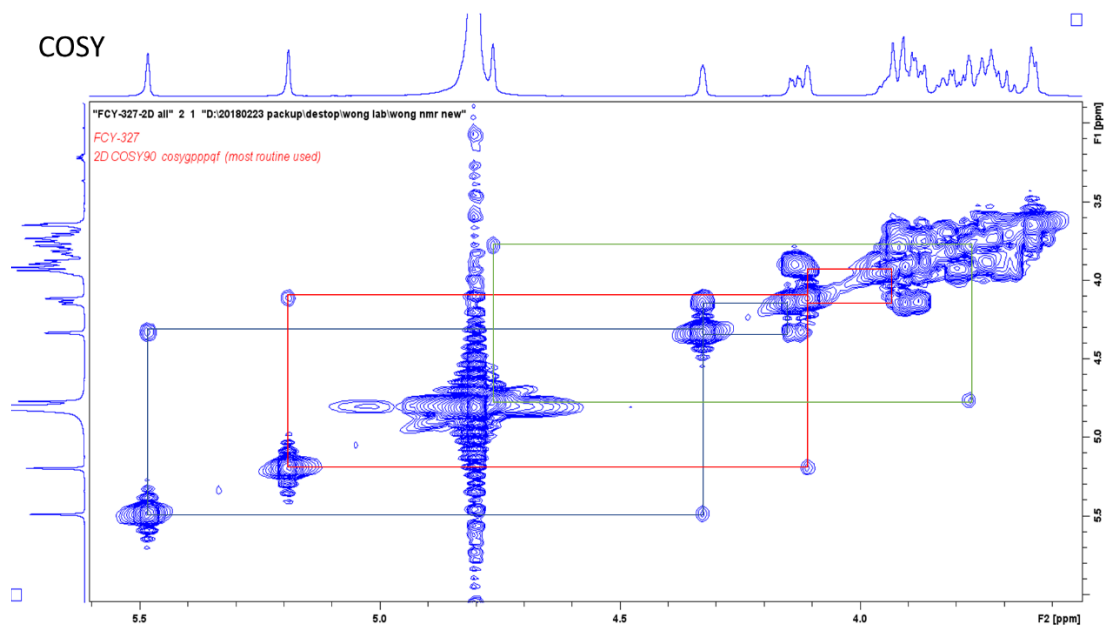

**Figure S16.** 2D COSY NMR spectrum of phenyltrimannose **48**.

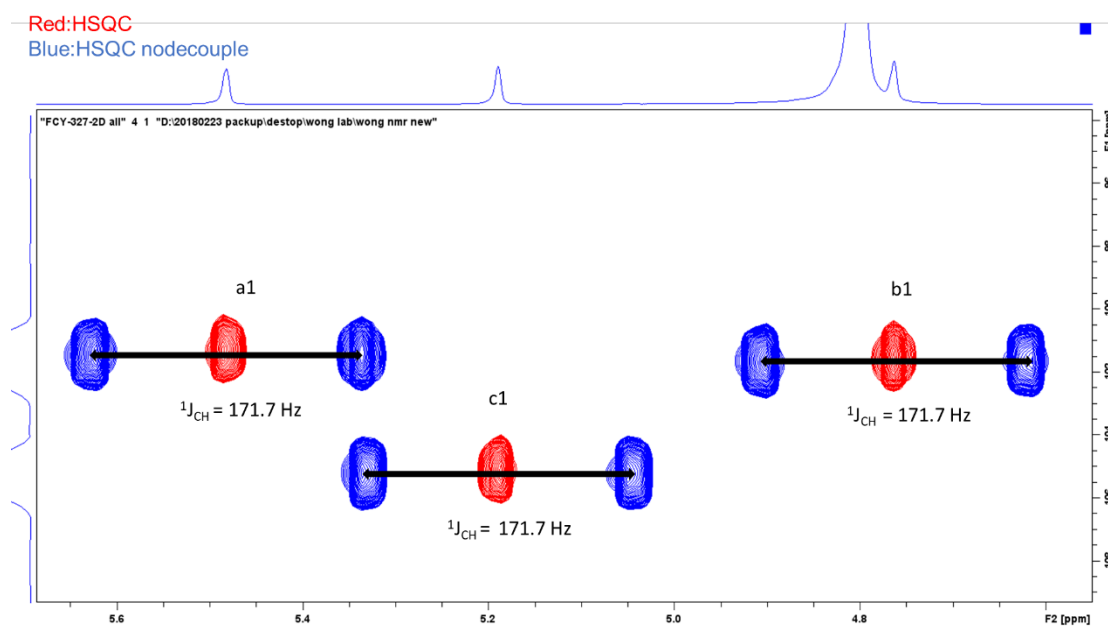

**Figure S17.** HSQC and HSQC nodecouple NMR spectrum of phenyltrimannose **48**.



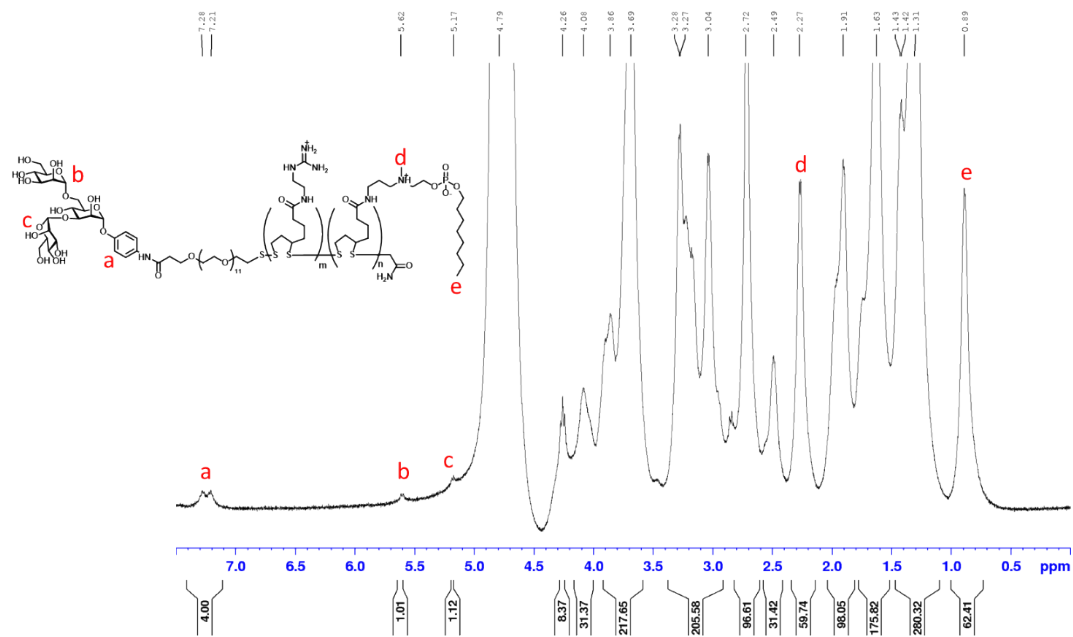

**Figure S18.  $^1\text{H}$  NMR characterization of synthesized copolymers I9-P1/P5.**

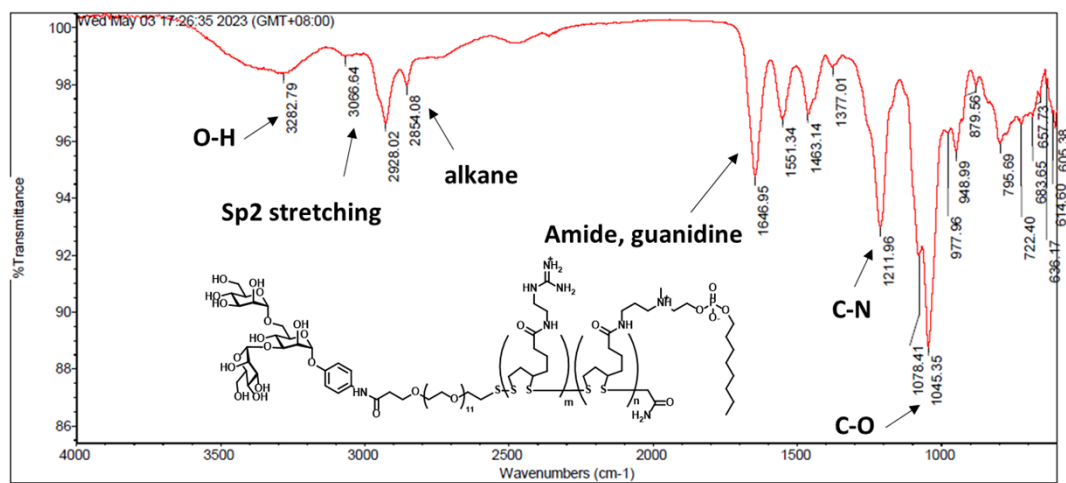

**Figure S19. IR characterization of synthesized copolymers I9-P1/P5.**

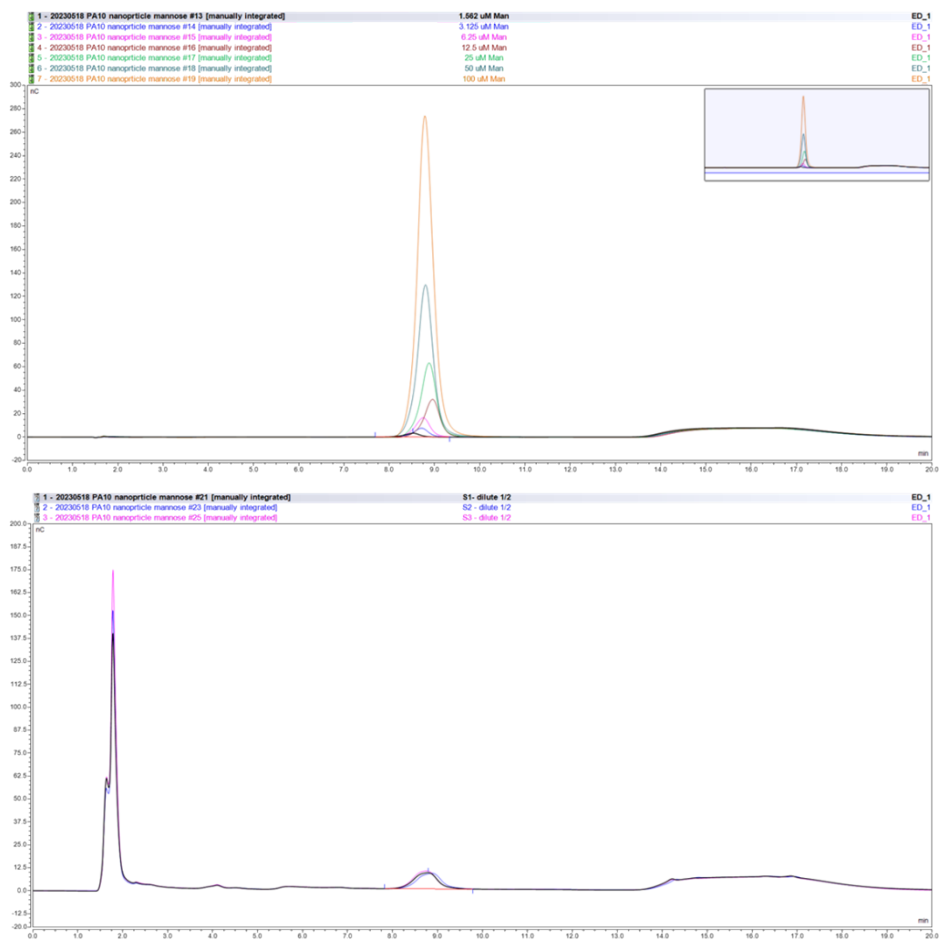

Man

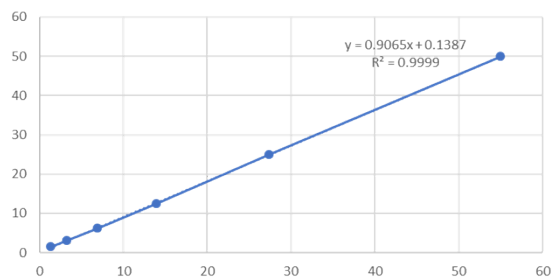

|        |          |        |        |        |         |         |         |
|--------|----------|--------|--------|--------|---------|---------|---------|
|        | con (uM) | 1.562  | 3.125  | 6.25   | 12.5    | 25      | 50      |
| (Area) | Man      | 1.3615 | 3.2053 | 6.9001 | 13.9073 | 27.3202 | 54.9801 |

| Peak Name     | Ret.Time( min) | Area( nC*min) | Conc. ( μM) |
|---------------|----------------|---------------|-------------|
| S1 dilute 1/2 | 8.792          | 5.6082        | 5.22        |
| S2 dilute 1/2 | 8.875          | 5.4404        | 5.07        |
| S3 dilute 1/2 | 8.767          | 6.1019        | 5.67        |

| Sample Name | Conc. ( μM) | nmol/mg NP |
|-------------|-------------|------------|
| S1          | 10.45       | 107.1      |
| S2          | 10.14       | 103.9      |
| S3          | 11.34       | 116.2      |

**Figure S20.** Quantification of glycan on mRNA-PNP (I9-P1/P5). (a) HPAEC-PAD chromatogram recorded with mannose appearing at the retention time of 8.8 min. (b) standard curve of free mannose and calculation of surface glycan on mRNA-PNP.

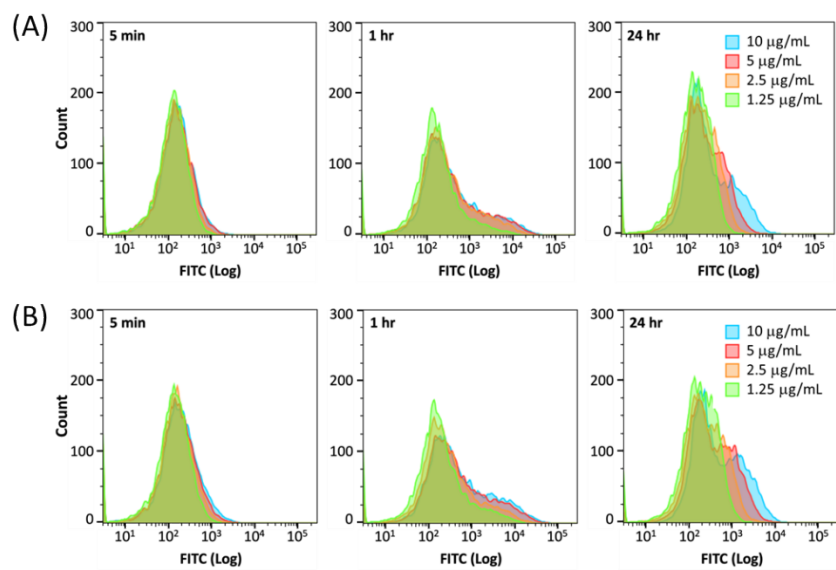

**Figure S21.** Flow cytometry analysis of FITC signals at different dilutions and incubation time points with (A) mRNA-PNP (I1-P1/P5) (B) mRNA-PNP (I9-P1/P5). mRNA-PNP: 10  $\mu\text{g/mL}$ , 5  $\mu\text{g/mL}$ , 2.5  $\mu\text{g/mL}$ , 1.25  $\mu\text{g/mL}$ ; 5 min, 1 hr, 24 hr.

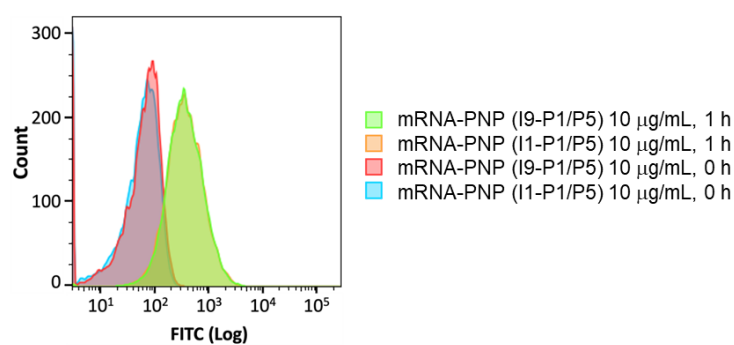

**Figure S22.** FITC signal of C2C12 myoblast after incubation with mRNA-PNP measured by flow cytometry.

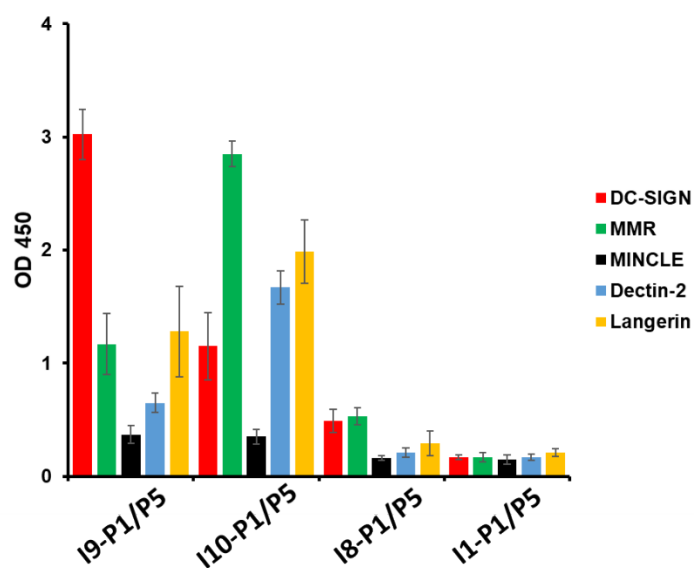

**Figure S23.** ELISA binding analysis of DC-SIGN, MMR, MINCLE, Dectin-2 and Langerin (0.625  $\mu\text{g/mL}$ ) at pH 7.4 to PNPs.

#### References.

1. R. N. Kirchdoerfer, N. Wang, J. Pallesen, D. Wrapp, H. L. Turner, C. A. Cottrell, K. S. Corbett, B. S. Graham, J. S. McLellan and A. B. Ward, *Sci. Rep.*, 2018, **8**, 15701.
2. J. Fu, C. Yu, L. Li and S. Q. Yao, *J. Am. Chem. Soc.*, 2015, **137**, 12153-12160.
3. T. T. Wang, G. S. Tan, R. Hai, N. Pica, L. Ngai, D. C. Ekiert, I. A. Wilson, A. García-Sastre, T. M. Moran and P. Palese, *Proceedings of the National Academy of Sciences*, 2010, **107**, 18979-18984.
4. H.-Y. Huang, H.-Y. Liao, X. Chen, S.-W. Wang, C.-W. Cheng, M. Shahed-Al-Mahmud, Y.-M. Liu, A. Mohapatra, T.-H. Chen, J. M. Lo, Y.-M. Wu, H.-H. Ma, Y.-H. Chang, H.-Y. Tsai, Y.-C. Chou, Y.-P. Hsueh, C.-Y. Tsai, P.-Y. Huang, S.-Y. Chang, T.-L. Chao, H.-C. Kao, Y.-M. Tsai, Y.-H. Chen, C.-Y. Wu, J.-T. Jan, T.-J. R. Cheng, K.-I. Lin, C. Ma and C.-H. Wong, *Sci. Transl. Med.*, 2022, **14**, eabm0899.
5. J. Guo, T. Wan, B. Li, Q. Pan, H. Xin, Y. Qiu and Y. Ping, *ACS Central Science*, 2021, **7**, 990-1000.
6. R. Kuppasamy, M. Yasir, T. Berry, C. G. Cranfield, S. Nizalapur, E. Yee, O. Kimyon, A. Taunk, K. K. K. Ho, B. Cornell, M. Manefield, M. Willcox, D. S. Black and N. Kumar, *Eur. J. Med. Chem.*, 2018, **143**, 1702-1722.
7. S. Liu, X. Wang, X. Yu, Q. Cheng, L. T. Johnson, S. Chatterjee, D. Zhang, S. M. Lee, Y. Sun, T.-C. Lin, J. L. Liu and D. J. Siegwart, *J. Am. Chem. Soc.*, 2021, **143**, 21321-21330.
8. H. Uzawa, H. Ito, M. Izumi, H. Tokuhisa, K. Taguchi and N. Minoura,

*Tetrahedron*, 2005, **61**, 5895-5905.

9. W. Peng and J. C. Paulson, *J. Am. Chem. Soc.*, 2017, **139**, 12450-12458.
10. W.-T. Chien, C.-F. Liang, C.-C. Yu, C.-H. Lin, S.-P. Li, I. Primadona, Y.-J. Chen, K. K. T. Mong and C.-C. Lin, *Chem. Commun.*, 2014, **50**, 5786-5789.
11. S. Y. Maklakova, V. A. Naumenko, A. D. Chuprov, M. P. Mazhuga, N. V. Zyk, E. K. Beloglazkina and A. G. Majouga, *Carbohydr. Res.*, 2020, **489**, 107928.
12. C.-W. Lin, Y.-J. Wang, T.-Y. Lai, T.-L. Hsu, S.-Y. Han, H.-C. Wu, C.-N. Shen, V. Dang, M.-W. Chen, L.-B. Chen and C.-H. Wong, *Proceedings of the National Academy of Sciences*, 2021, **118**, e2114774118.
13. W. Peng, R. P. de Vries, O. C. Grant, A. J. Thompson, R. McBride, B. Tsogetbaatar, P. S. Lee, N. Razi, I. A. Wilson, R. J. Woods and J. C. Paulson, *Cell Host Microbe*, 2017, **21**, 23-34.
14. H.-K. Lee, C. N. Scanlan, C.-Y. Huang, A. Y. Chang, D. A. Calarese, R. A. Dwek, P. M. Rudd, D. R. Burton, I. A. Wilson and C.-H. Wong, *Angew. Chem. Int. Ed.*, 2004, **43**, 1000-1003.

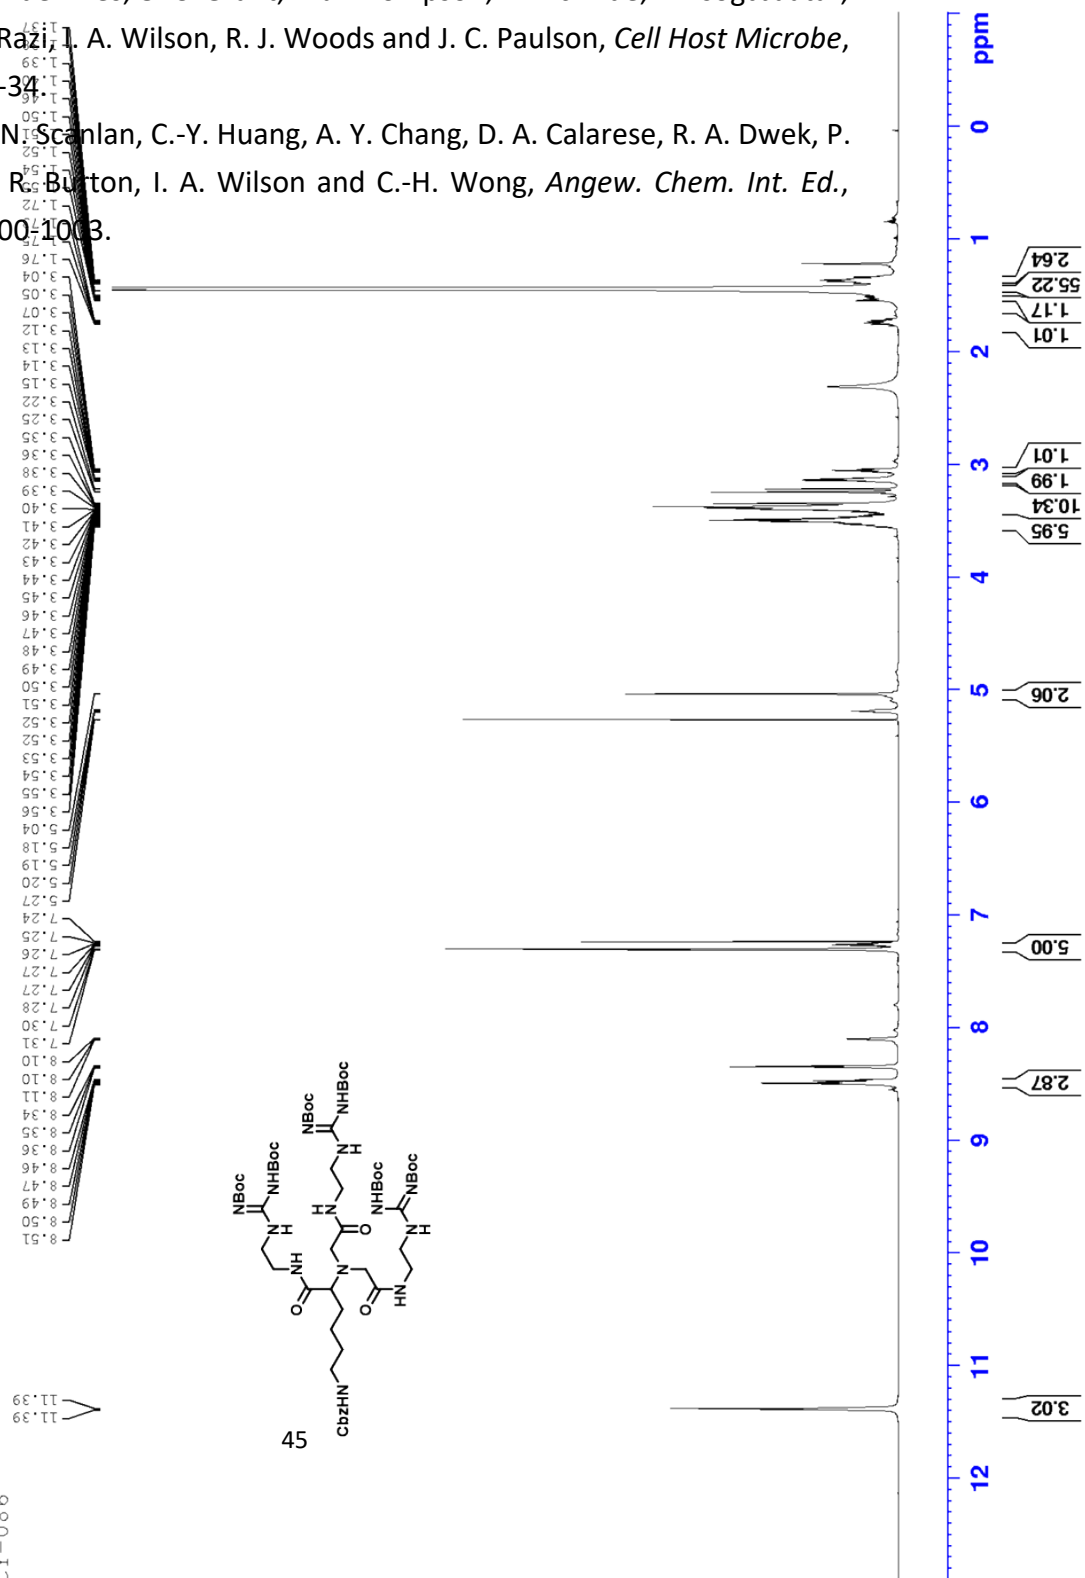

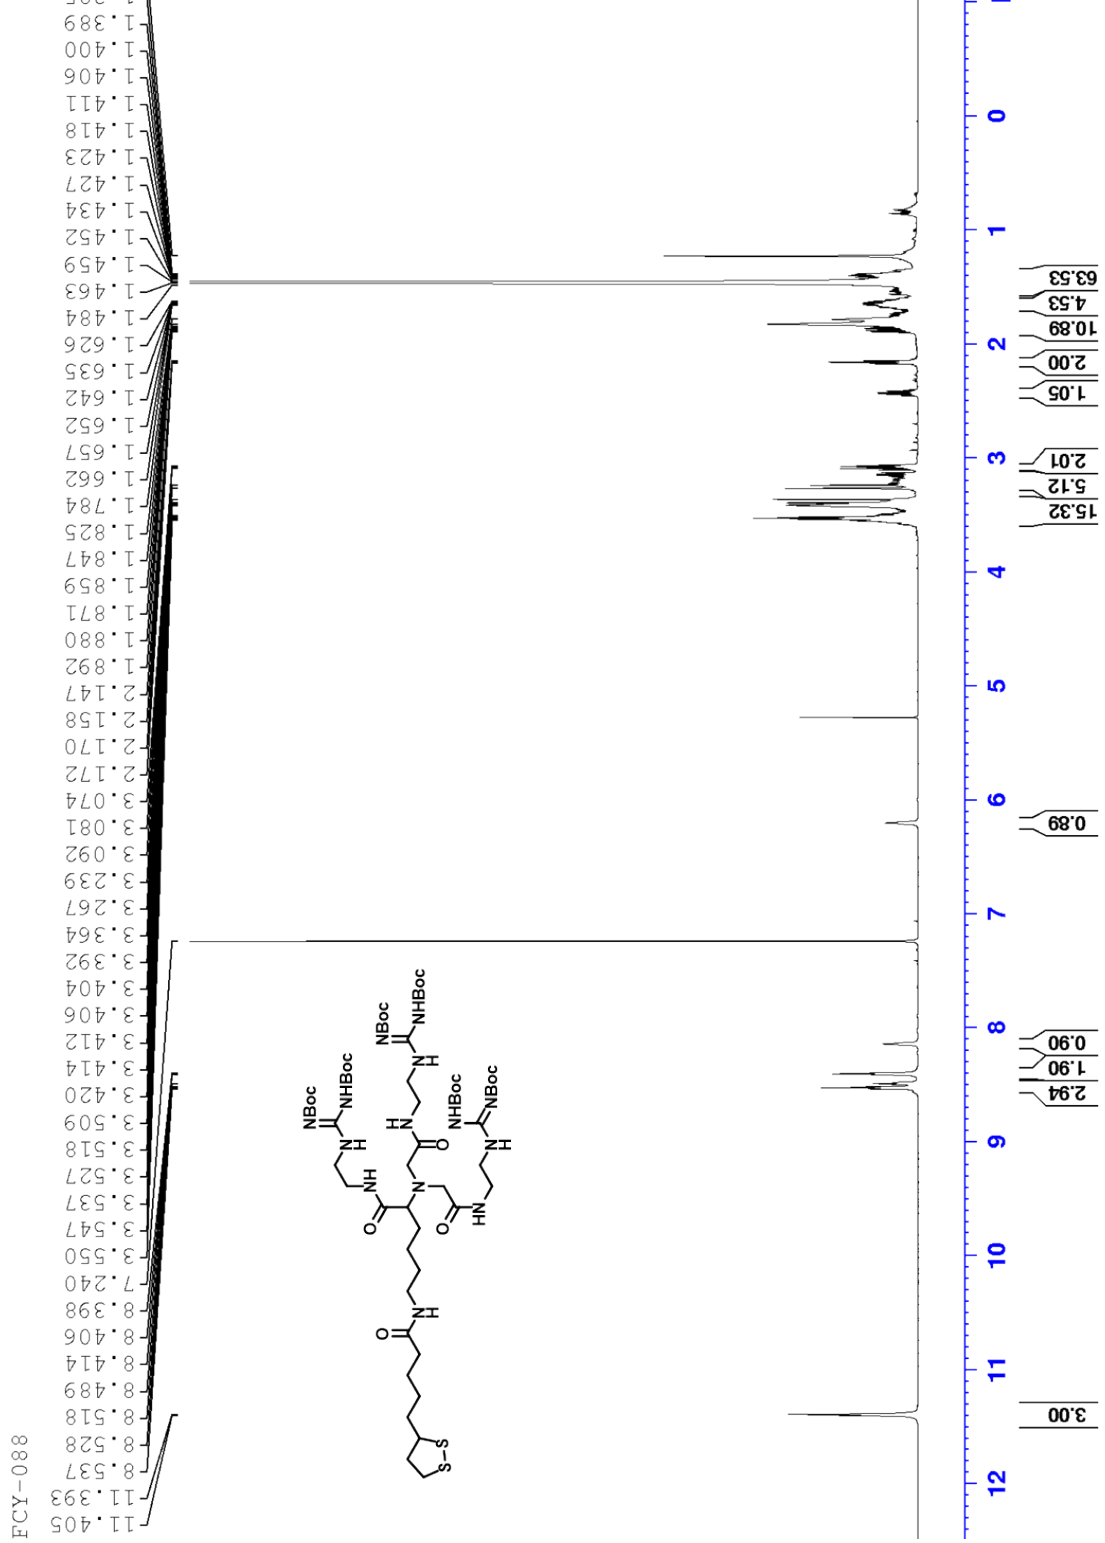







FCY-097

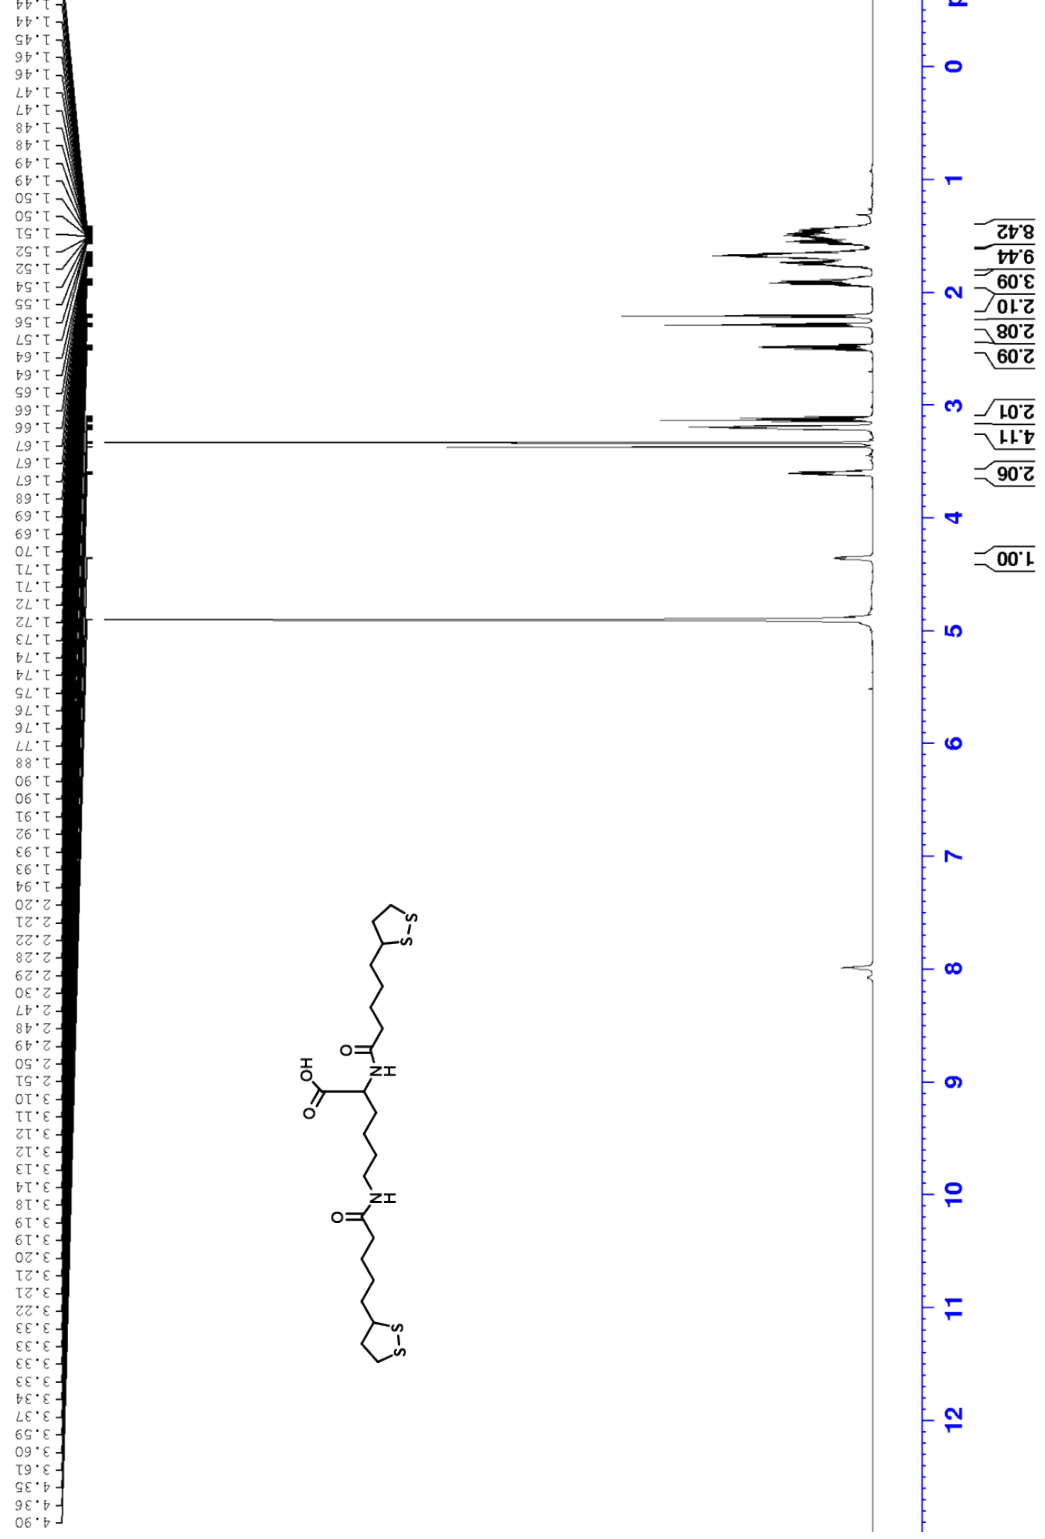

FCY-098

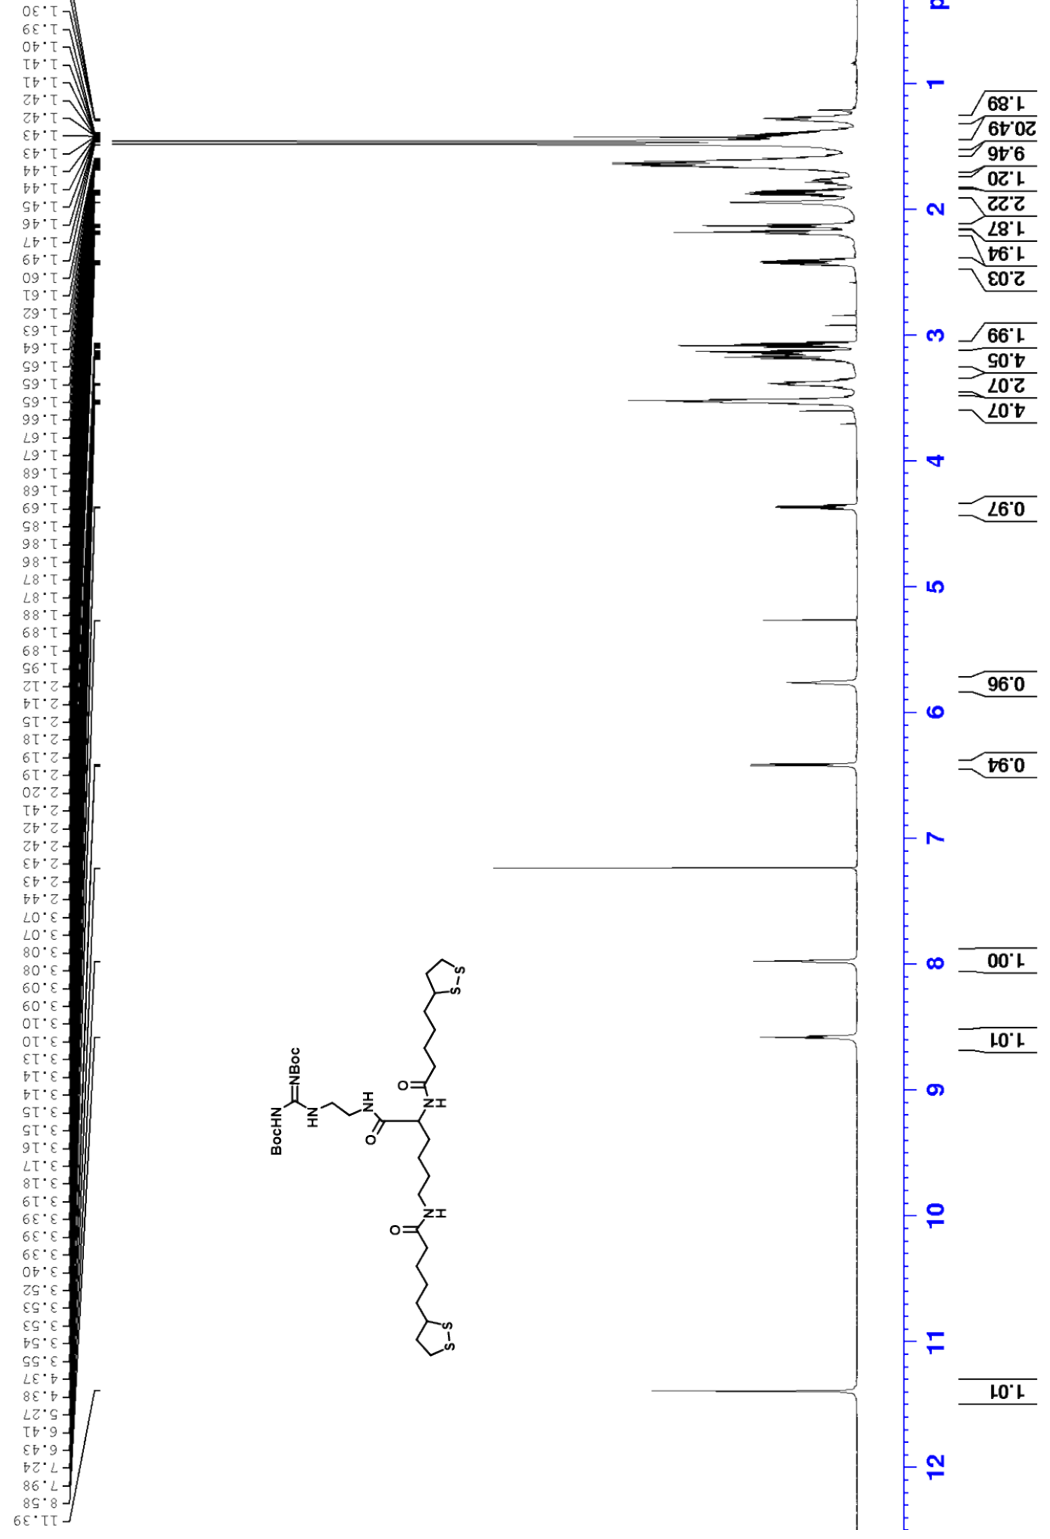

FCY-098-C

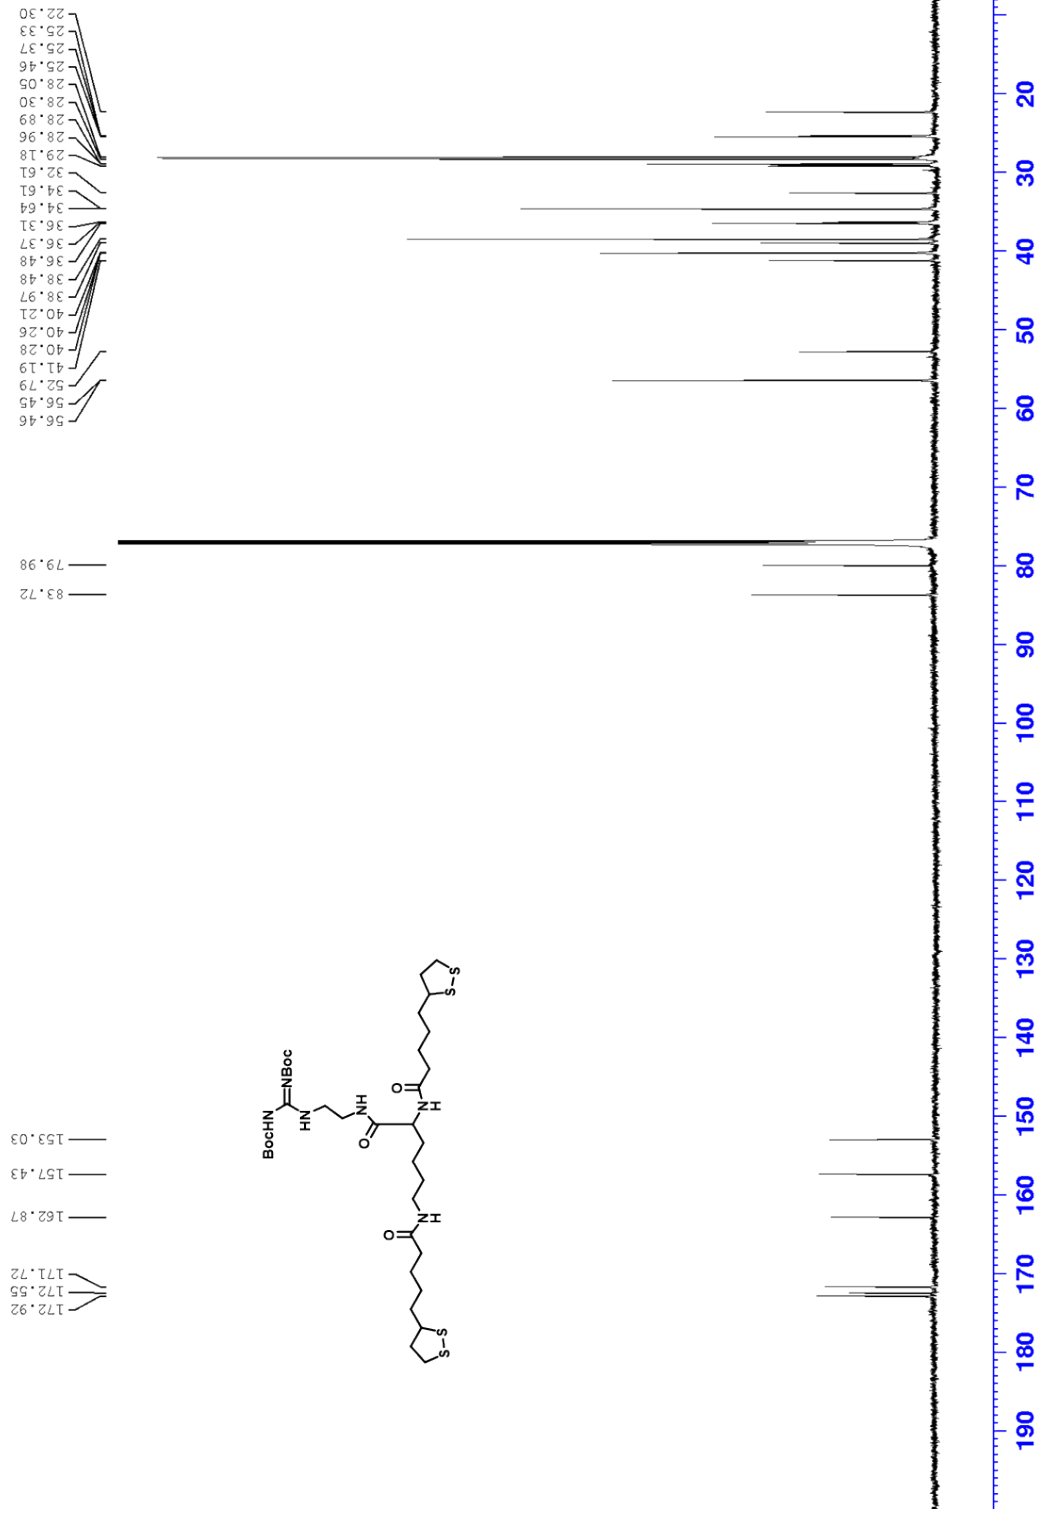

FCY-164-3

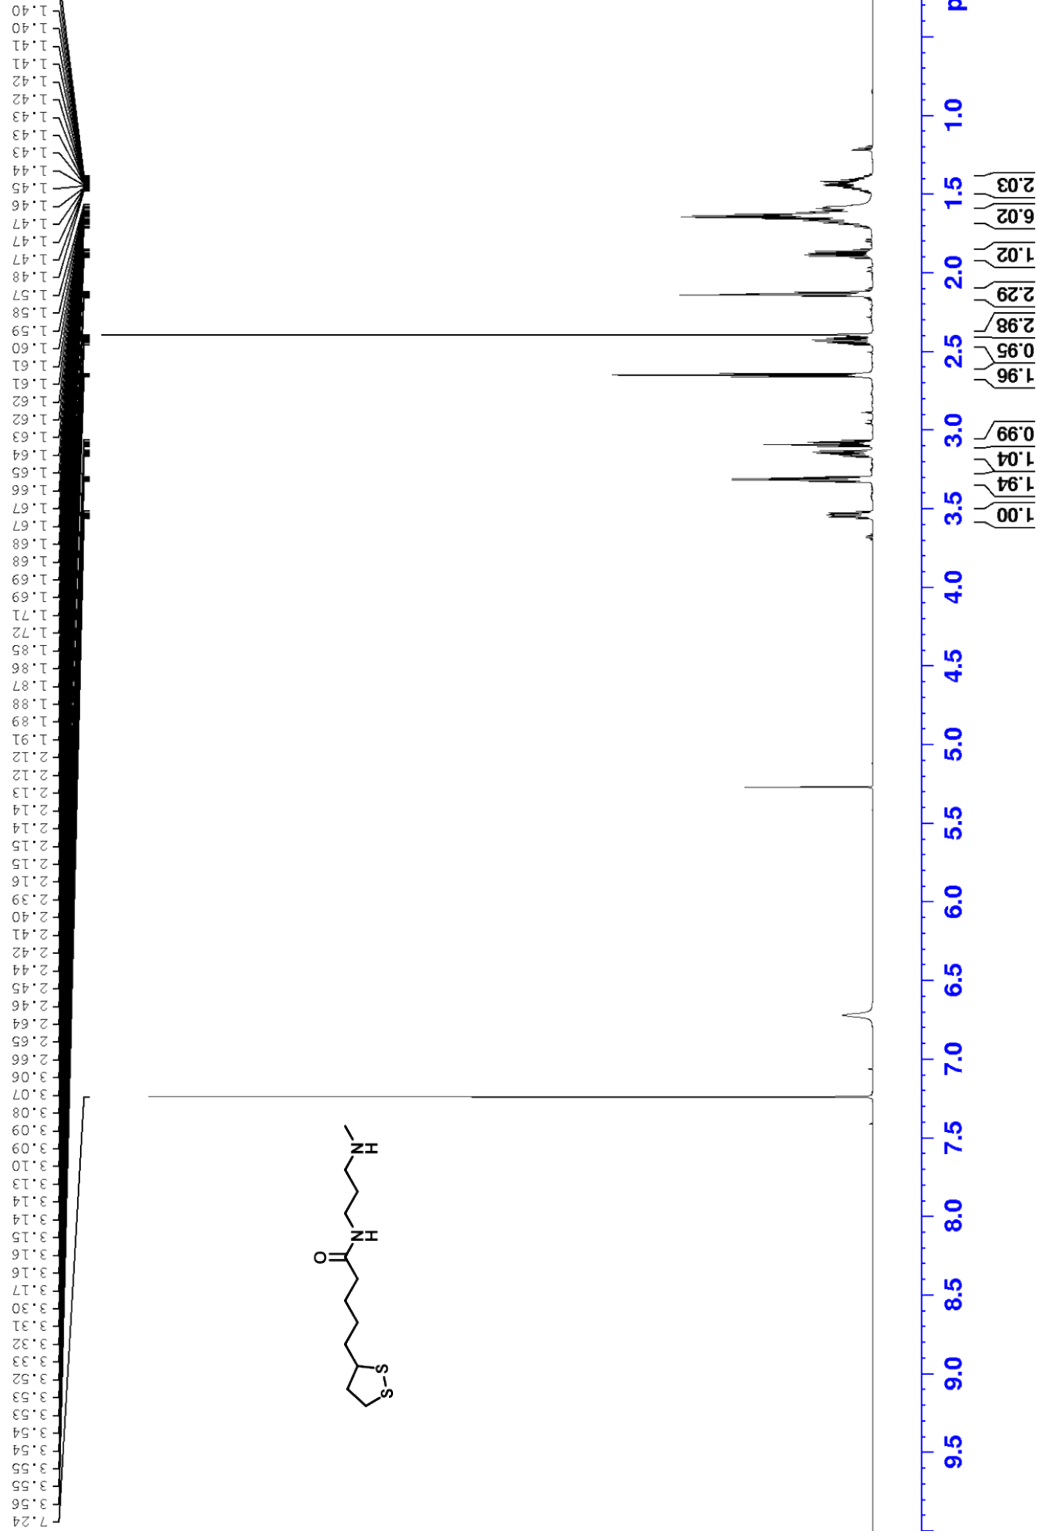

FCY-165-H

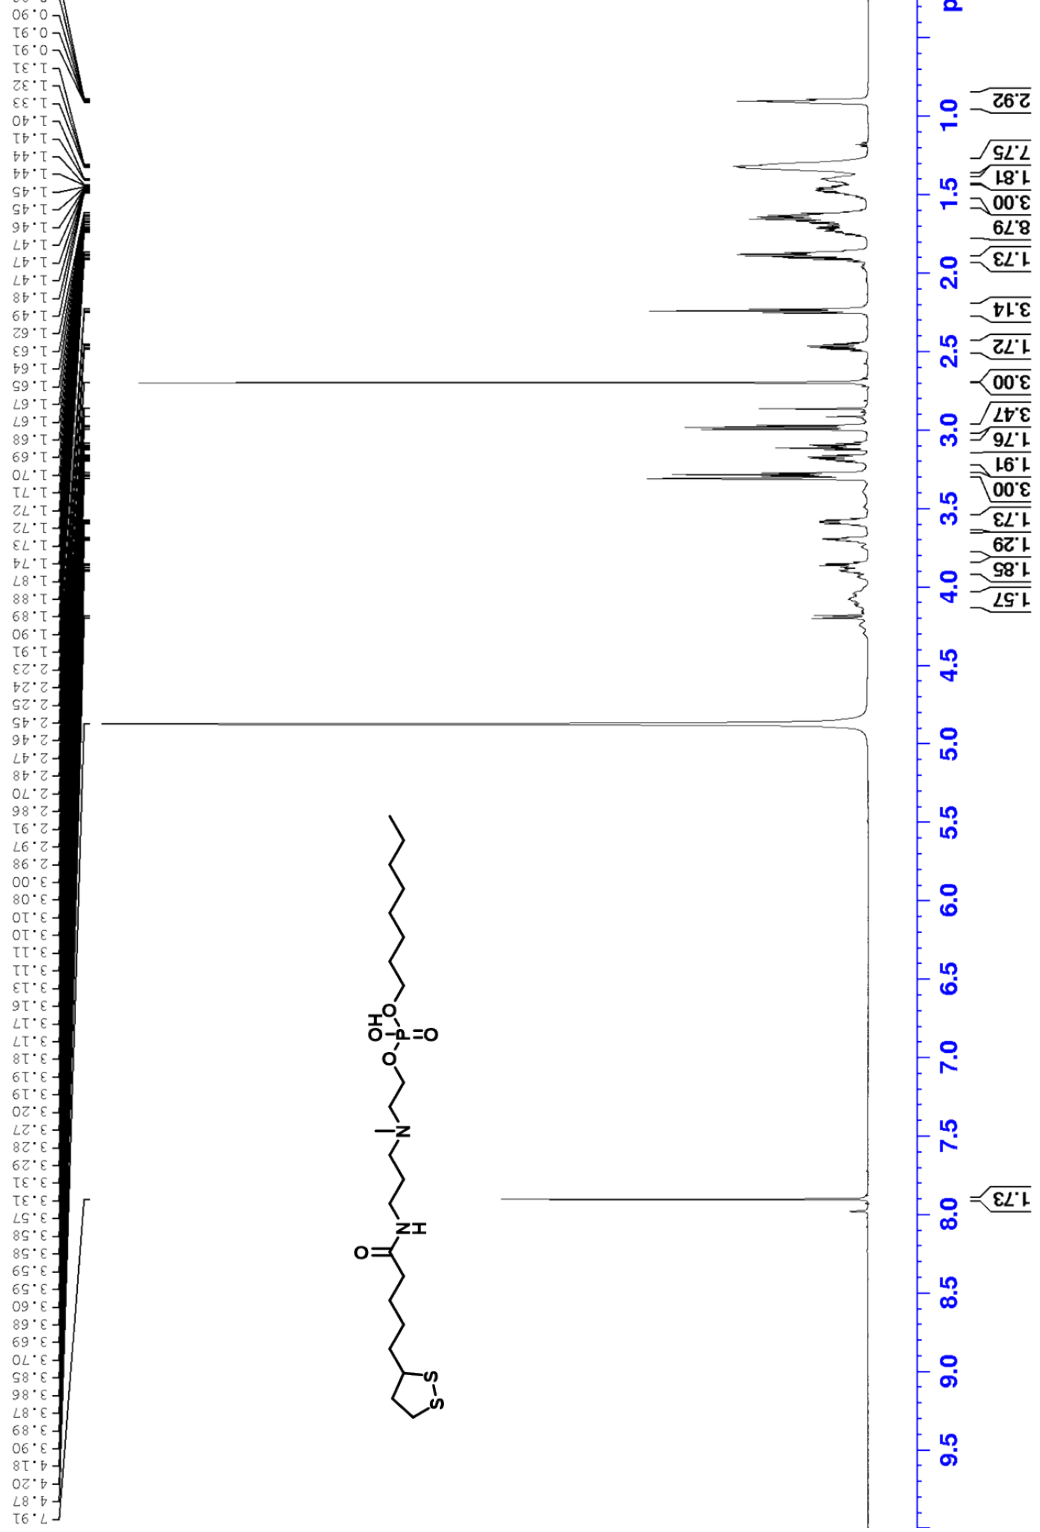

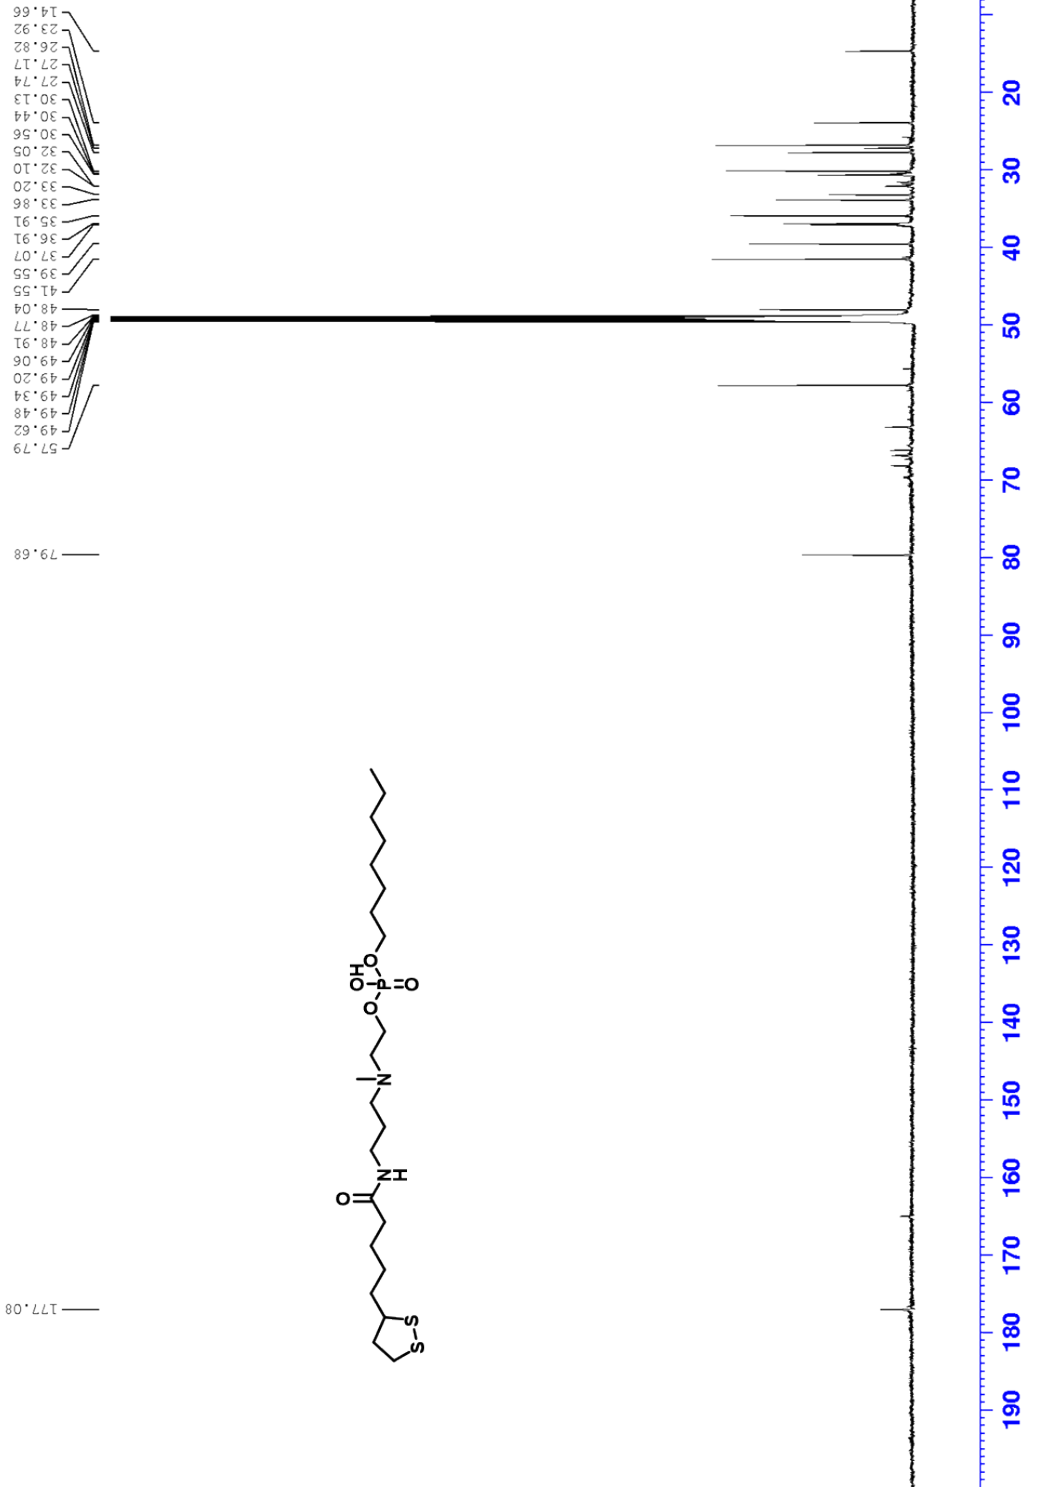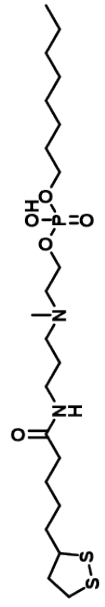

FCY-165-C

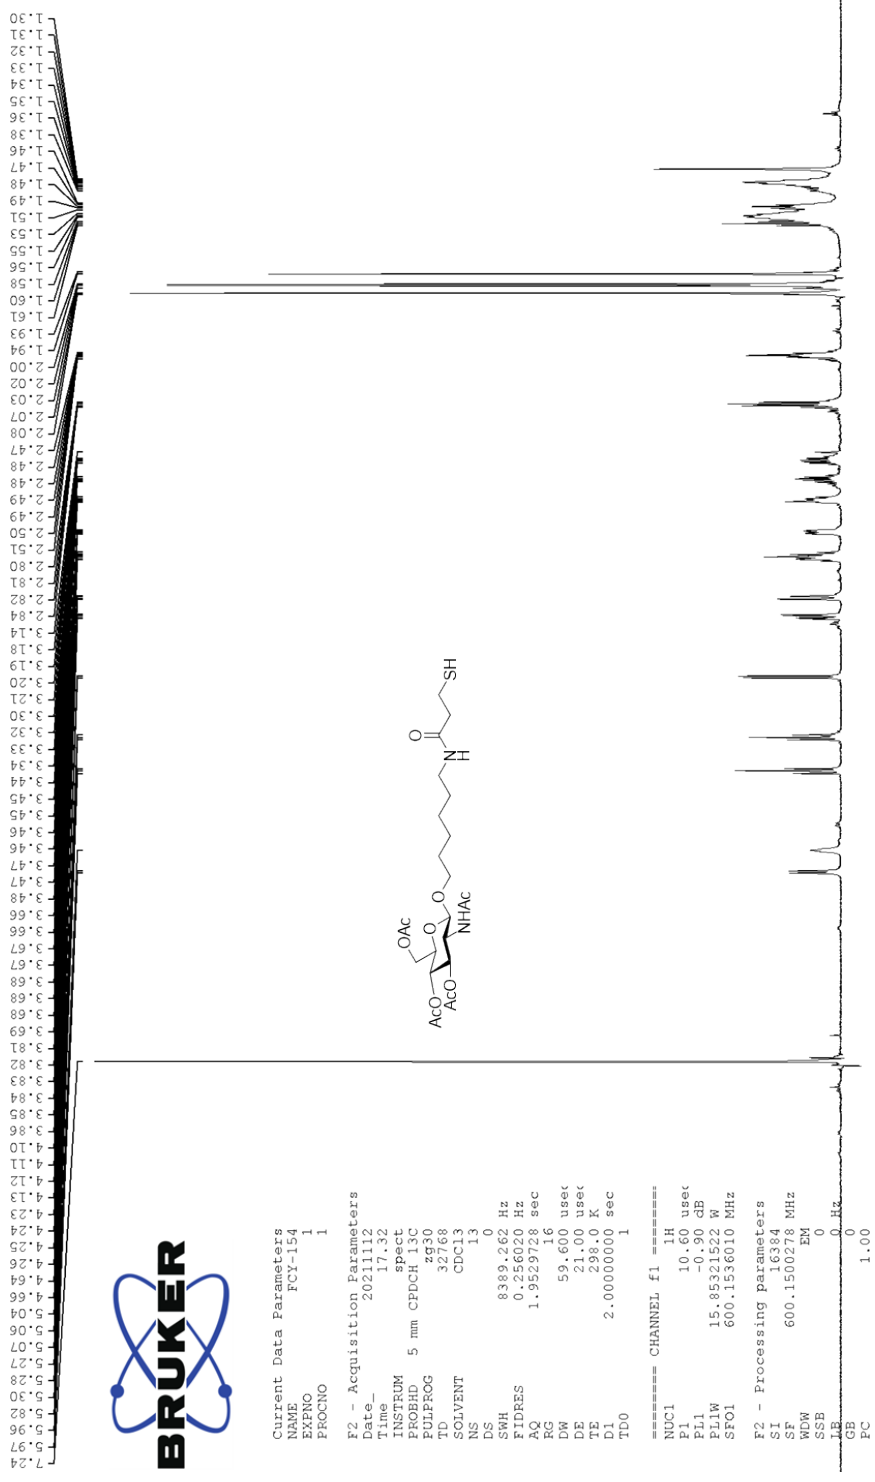

Current Data Parameters  
 NAME FCY-154  
 EXNO 1  
 PROCNO 1

F2 - Acquisition Parameters  
 Date\_ 20211112  
 Time\_ 17.32  
 INSTRUM spect  
 PROBDH 5 mm CPDCH 13C  
 PULPROG zg30  
 TD 32768  
 SOLVENT CDC13  
 NS 13  
 DS 0  
 SWH 8389.262 Hz  
 FIDRES 0.856678 Hz  
 AQ 1.952978 sec  
 PC 16  
 DW 59.600 usec  
 DE 21.00 usec  
 TE 298.0 K  
 D1 2.00000000 sec  
 TDO 1

===== CHANNEL f1 =====  
 NUC1 1H  
 P1 10.60 usec  
 PL1 -0.90 dB  
 PL1W 15.85321522 W  
 SF01 600.1536010 MHz

F2 - Processing parameters  
 S1 16384  
 SF 600.1500278 MHz  
 SCW EM  
 LBE 0 Hz  
 GB 0  
 PC 1.00

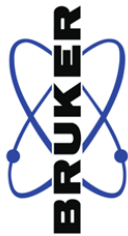

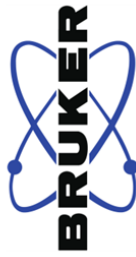

```

Current Data Parameters
NAME      FCY-170-0109
EXPNO     1
PROCNO    1

F2 - Acquisition Parameters
Date_     20230109
Time      17.42
INSTRUM   spect
PROBHD    5 mm CPDCH 130
PULPROG   zgpg30
TD        32768
SOLVENT   MeOD
NS         11
DS         0
SWH        8389.262 Hz
FIDRES     0.256020 Hz
AQ         1.9529728 sec
RG         25.4
DW         59.600 usec
DE         21.00 usec
TE         298.0 K
D1         2.00000000 sec
TD0        1

----- CHANNEL f1 -----
NUC1       1H
P1         12.40 usec
PL1        -0.90 db
PL12       15.85321522 MHz
SFO1       600.1566010 MHz

F2 - Processing Parameters
SI         16384
SF         600.1560130 MHz
WDW        EM
SSB        0
LB         0 Hz
GB         0
PC         1.00
  
```

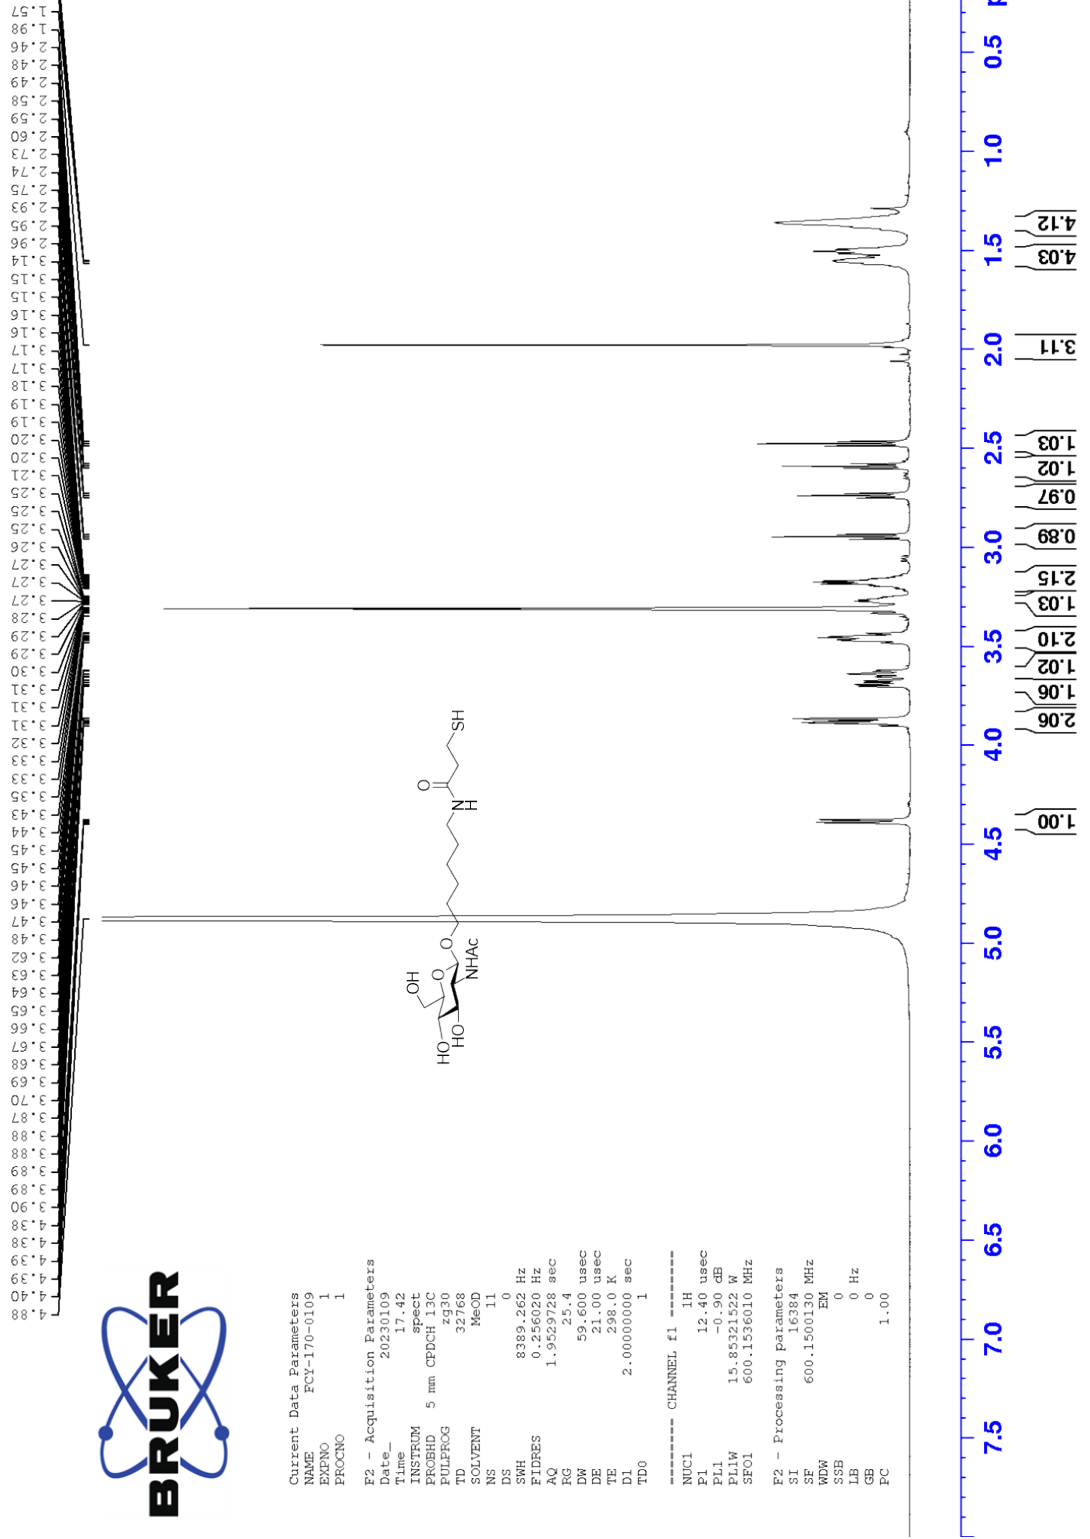



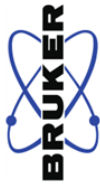

```

Comment Data Parameters
NAME      SEC-176-D103-C
EXPNO     1
PROCNO    1
F2 - Acquisition Parameters
Date_     20210109
Time      13:55:56
INSTRUM   spect
PROBHD    5 mm CPDCH 13C
PULPROG   zgpg30
TD         131072
SOLVENT   MeOD
DS         1
SI         1
SF         39062.500 Hz
AQ         0.727516 Hz
RG         1.677516 Hz
FIDRES    0.228 Hz
AQRES     724 sec
DM         12.000 usec
DE         298.0 K
TE         2.0000000 sec
D1         0.15000000 sec
TD0        1
===== CHANNEL f1 =====
NUC1       13C
P1         13.55 usec
PL1        0.00 dB
PC1        2.00 dB
F1F1W      31.74709702 W
SFO1       150.9251877 MHz
===== CHANNEL f2 =====
CPDPRG2(C)  waltz16
NUC2       13C
P2         80.00 usec
PL2        -1.00 dB
PC2        -1.00 dB
F1F2       14.16 dB
PL12       14.16 dB
PL22       14.16 dB
PL12W      16.60035515 W
F1F2W      0.49484831 W
SFO2       600.1324600 MHz
F2 - Processing parameters
SI         65536
SF         150.9076289 MHz
AQ         0.727516 Hz
RG         1.677516 Hz
DM         12.000 usec
DE         2.00 Hz
TE         0
D1         1.00 sec
  
```

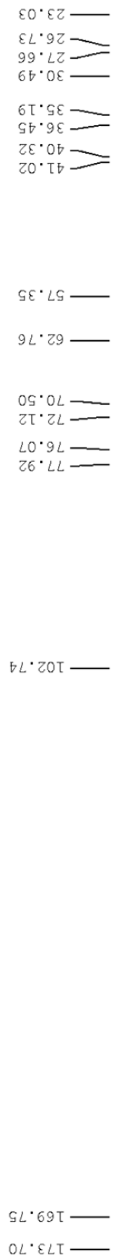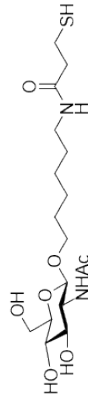

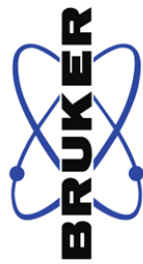

8.33  
7.99  
7.75  
7.73  
7.72  
7.72  
7.71  
7.51  
7.49  
7.48  
7.48  
7.42  
7.42  
7.41  
7.40  
7.39  
7.39  
4.99  
4.97  
4.96  
4.76  
4.54  
4.41  
4.39  
4.26  
4.23  
3.99  
3.92  
3.77  
3.75  
3.69  
3.67  
3.66  
3.65  
3.50  
3.47  
3.44  
3.43  
3.40  
3.39  
3.37  
3.36  
3.33  
3.29  
3.20  
3.18  
3.07  
3.06  
3.05  
3.03  
3.02  
2.94  
2.96  
2.88  
2.87  
2.86  
2.62  
2.61  
2.55  
2.51  
2.46  
2.45  
2.44  
1.88  
1.87  
1.83  
1.83  
1.82  
1.80  
1.79  
1.42  
1.37  
1.36  
1.35  
1.32  
1.30

Current Data Parameters  
 NAME FCY-BPC-SCR-0109-5  
 EXPNO 1  
 PROCNO 1  
 F2 - Acquisition Parameters  
 Date\_ 20230109  
 Time 17.36  
 INSTRUM spect  
 PULPROG zgpg30  
 TD 32768  
 SOLVENT DMSO  
 NS 29  
 DS 0  
 DE 8389.360 Hz  
 FIDRES 0.256020 Hz  
 AQ 1.9529728 sec  
 RG 25.4  
 DW 59.600 usec  
 DE 21.00 usec  
 TE 300.2 K  
 D1 2.0000000 sec  
 TD0 1

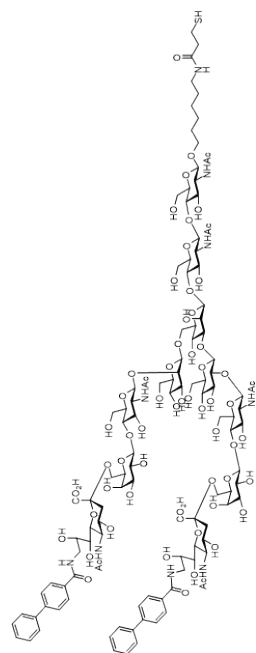

===== CHANNEL f1 =====  
 NUC1 1H  
 P1 12.00 usec  
 PL1 -6.90 dB  
 PL1W 15.85321522 W  
 SF01 600.1536010 MHz  
 F2 - Processing Parameters  
 SF 600.1536010 MHz  
 WELW EM  
 SSB 0  
 LB 0 Hz  
 GB 0  
 PC 1.00

12  
11  
10  
9  
8  
7  
6  
5  
4  
3  
2  
1  
0

1.02  
1.71  
1.70  
2.72  
1.64  
1.22  
1.13  
1.85  
3.32  
1.77  
1.67  
5.35  
2.26  
3.16  
1.16  
1.65  
2.54  
1.61  
3.56  
2.01  
1.01  
1.00  
0.74

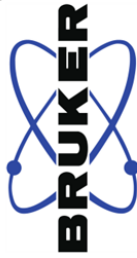

Current Data Parameters  
 NAME FCY-SCT-Glc-0109-4  
 EXPNO 1  
 PROCNO 1  
 F2 - Acquisition Parameters  
 Date\_ 20231019  
 Time 13:24  
 INSTRUM spect  
 PROBD 5 mm CPDCH13C  
 PULPROG zg30  
 TD 32768  
 SOLVENT DMSO  
 NS 10  
 DS 10  
 SWH 8389.262 Hz  
 FIDRES 0.256020 Hz  
 AQ 1.9529728 sec  
 RG 20.2  
 DW 59.600 usec  
 DE 21.00 usec  
 TE 298.0 K  
 D1 2.00000000 sec  
 TD0 1

----- CHANNEL f1 -----  
 NUC1 1H  
 P1 12.40 usec  
 PL1 -0.90 dB  
 PL1W 15.85321522 W  
 SF01 600.1536610 MHz

F2 - Processing parameters  
 SI 16384  
 SF 600.1500000 MHz  
 WDW EM  
 SSB 0 Hz  
 LB 0  
 GB 0  
 FC 1.00

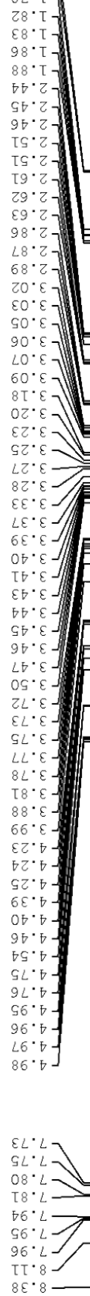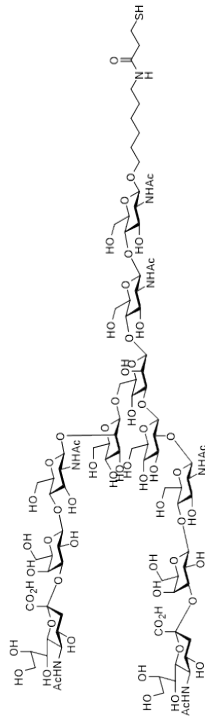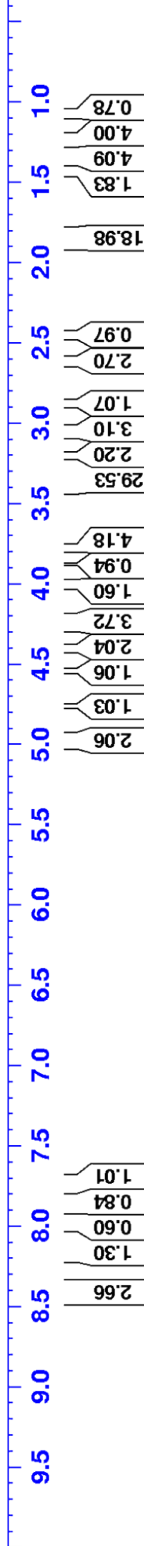

8.11 8.10 8.00 7.94 7.84 7.74 7.64 7.54 7.44 7.34 7.24 7.14 7.04 6.94 6.84 6.74 6.64 6.54 6.44 6.34 6.24 6.14 6.04 5.94 5.84 5.74 5.64 5.54 5.44 5.34 5.24 5.14 5.04 4.94 4.84 4.74 4.64 4.54 4.44 4.34 4.24 4.14 4.04 3.94 3.84 3.74 3.64 3.54 3.44 3.34 3.24 3.14 3.04 2.94 2.84 2.74 2.64 2.54 2.44 2.34 2.24 2.14 2.04 1.94 1.84 1.74 1.64 1.54 1.44 1.34 1.24 1.14 1.04 1.00 0.96 0.92 0.88 0.84 0.80 0.76 0.72 0.68 0.64 0.60 0.56 0.52 0.48 0.44 0.40 0.36 0.32 0.28 0.24 0.20 0.16 0.12 0.08 0.04 0.00

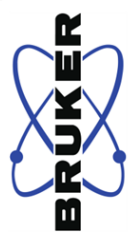

Current Data Parameters  
 NAME FCY-TCC-SCT-Glc-0109-4  
 EXPNO 1  
 PROCNO 1

F2 - Acquisition Parameters  
 Date\_ 20230109  
 Time 13.28  
 INSTRUM spect  
 PROBHD 5 mm CPDCH 13C  
 PULPROG zgpg30  
 TD 32768  
 SLOVENT DMSO  
 NS 10  
 DS 10  
 SWH 8389.262 Hz  
 FIDRES 0.256020 Hz  
 AQ 1.9529728 sec  
 RG 20.2  
 DW 59.600 us/c  
 DE 21.00 us/c  
 TE 298.0 K  
 D1 2.0000000 sec  
 TDO 1

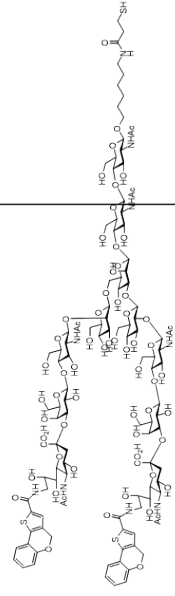

===== CHANNEL f1 =====  
 NUC1 1H  
 P1 12.40 us/c  
 PL 15.85321522 dB  
 SFO1 600.1536010 MHz  
 F2 - Processing parameters  
 SI 16384  
 SF 600.1500000 MHz  
 WDW EM  
 SSB 0 Hz  
 LB 0 Hz  
 GB 0  
 PC 1.00

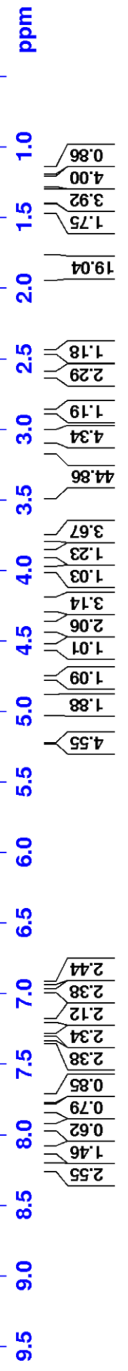

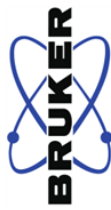

Current Data Parameters  
 NAME FCY-311-0427  
 EXPNO 1  
 PROCNO 1  
 F2 - Acquisition Parameters  
 Date\_ 20230427  
 Time 16.12  
 PULPROG zg30  
 PROBR1 5 mm CPDCH 13C  
 TD 32768  
 SOLVENT MeCl3  
 NS 45  
 DS 4  
 SWH 8389.262 Hz  
 FIDRES 0.25000 Hz  
 RG 1.925118 sec  
 DW 59.600 usec  
 DE 21.00 usec  
 DI 2.000000 K  
 D1 2.0000000 sec  
 TDD0 1  
 ===== CHANNEL f1 =====  
 NUC1 12.75 usec  
 P1 -0.90 dB  
 PL1 15.8522152 N  
 SF01 600.150010 MHz  
 F2 - Processing parameters  
 SI 16384  
 SF 600.1500000 MHz  
 EQ 0  
 SFB 0 Hz  
 LB 0  
 GB 0  
 PC 1.00

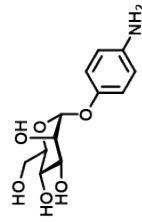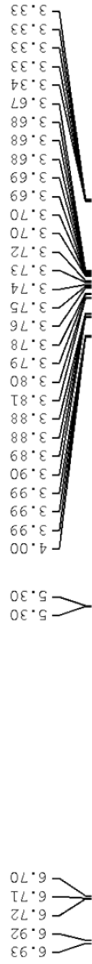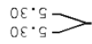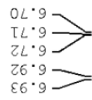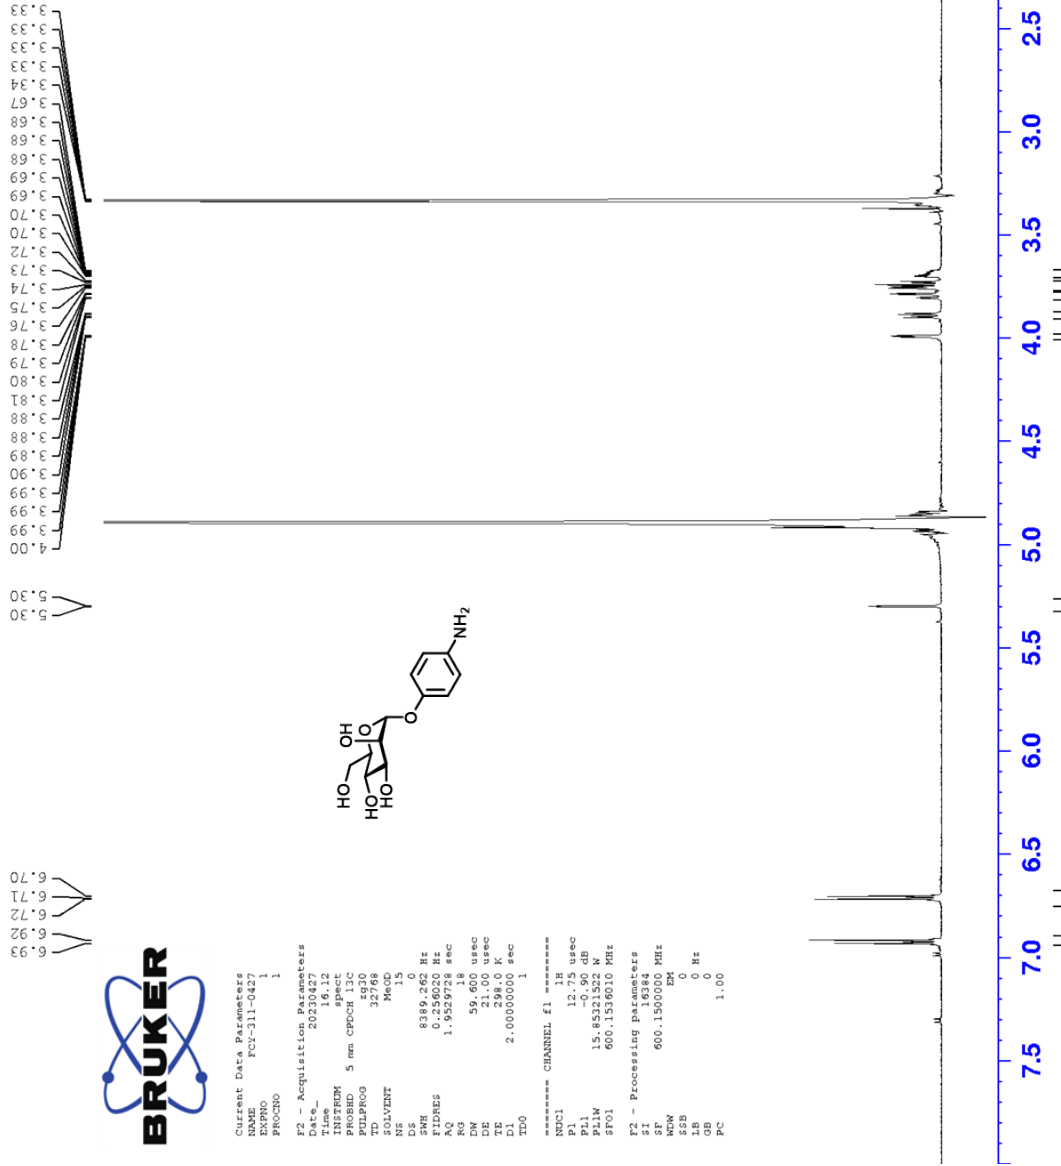

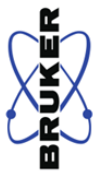

```

Current Data Parameters
NAME      FCY-311-0427-C
EXPNO     1
PROCNO    1
F2 - Acquisition Parameters
Date_     20030427
Time      16.14
INSTRUM   spect
PROBHD    3 mm CPDCH 13C
PULPROG   zgpg30
TD         65536
SOLVENT   Me2O
NS         45
DS         4
SWH        39062.500 Hz
FIDRES     0.298023 Hz
AQ         1.6777216 sec
RG         327.68
DM         12.800 usec
DE         21.00 usec
TE         300.2 K
D1         2.0000000 sec
D11        0.0300000 sec
TD0        1
===== CHANNEL f1 =====
NUC1       13C
P1         14.00 usec
PL1        0.00 dB
PL2        4.40 dB
PLLM       31.7470702 MHz
SFO1       150.9251877 MHz
===== CHANNEL f2 =====
CDEPRG02  waltz16
PCPD02     80.00 usec
PCPD02     -0.30 dB
PL2         5.16 dB
PL3         17.11 dB
PL4         14.45300441 MHz
PLLM        0.49848431 MHz
SFO2        600.1324006 MHz
F2 - Processing parameters
SI         65536
SF         150.9076111 MHz
RGW        EM
SFO         2.00 MHz
GB         0
PC         1.00
  
```

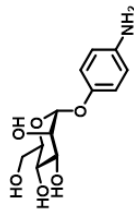

151.13 —  
 143.62 —  
 117.91 —  
 101.46 —  
 75.21 —  
 72.55 —  
 68.54 —  
 62.78 —

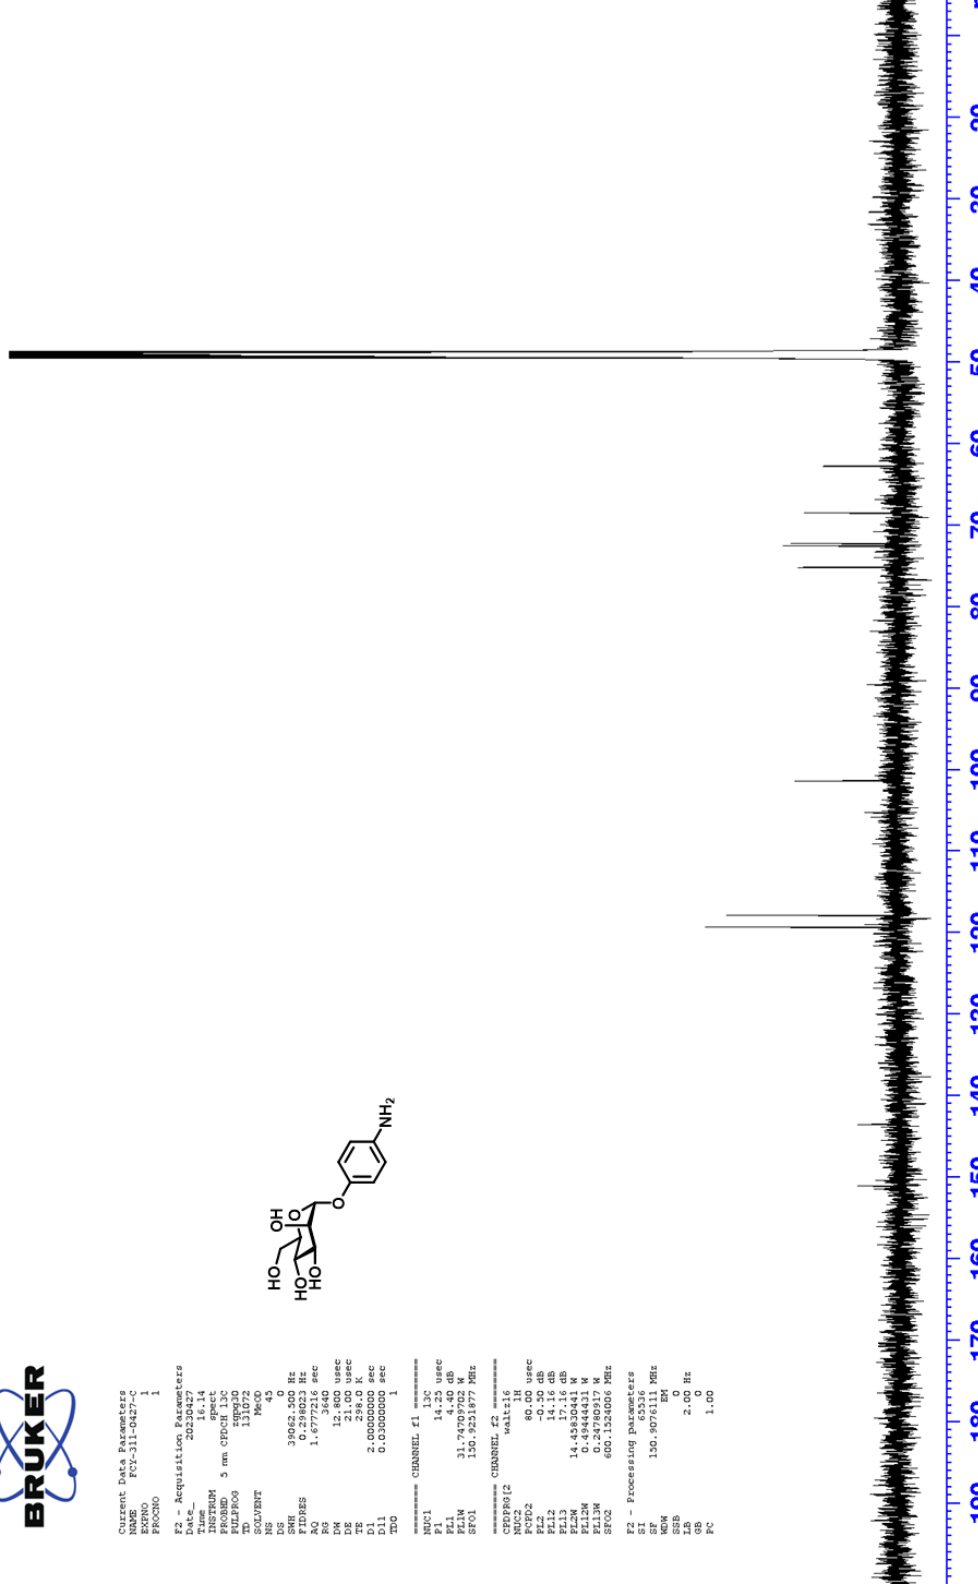

5.30  
4.90  
4.00  
3.99  
3.90  
3.89  
3.88  
3.81  
3.80  
3.79  
3.78  
3.76  
3.75  
3.74  
3.73  
3.70  
3.69  
3.68  
3.67  
3.64  
3.33  
3.33  
3.33  
2.73  
2.72  
2.71  
2.61  
2.60  
2.58

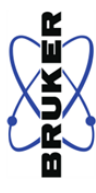

Current Data Parameters  
 NAME FCYC-311-SH-H  
 EXPNO 1  
 PROCNO 1

F2 - Acquisition Parameters  
 Date\_ 20230418  
 Time 17:21

INSTRUM spect  
 PROBHD 5 mm CPDCH 13C  
 PULPROG zgpg30  
 TD 32768

SOLVENT MeOD  
 NS 11  
 DS 0  
 SWH 8398.460 Hz  
 FIDRES 0.236620 Hz  
 AQ 1.9559728 sec  
 RG 16

DW 59.600 usec  
 DE 21.00 usec  
 TE 300.2 K  
 D1 2.00000000 sec  
 TD0 1

===== CHANNEL f1 =====  
 NUC1 13C  
 P1 12.75 usec  
 PL1 -0.90 dB  
 PL1W 15.89321522 W  
 SFO1 600.1536610 MHz

F2 - Processing Parameters  
 SI 16384  
 SF 600.1500000 MHz  
 WDM EM  
 ASB 0 Hz  
 LB 0 Hz  
 GB 0  
 PC 1.00

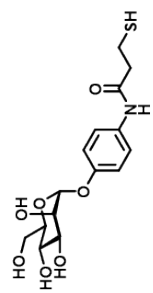

DMF

DMF

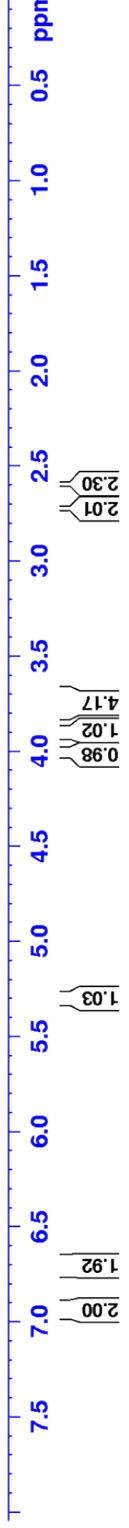

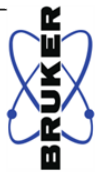

Current Data Parameters  
 NAME FCY-311-SR-C  
 PROCNO 1  
 F2 - Acquisition Parameters  
 Date\_ 20250118  
 Time\_ 17:22  
 INSTRUM spect  
 PROBRD 5 mm CPDCH 13C  
 PULPROG zgpg30  
 SOLVENT MeOD  
 NS 26  
 DS 0  
 SWH 39022.050 Hz  
 FIDRES 0.00000000  
 AQ 1.6777216 sec  
 RG 724  
 DW 12.800 usec  
 DE 0.00000000  
 TE 298.2 K  
 D1 2.00000000 sec  
 D11 0.03000000 sec  
 TDD 1

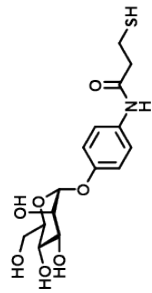

```

===== CHANNEL f1 =====
NUC1 13C
P1 14.25 usec
PL1 0.00 dB
PLM 31.74709700 N
SFO1 150.9251877 MHz

===== CHANNEL f2 =====
PROBHD2 *waltz16
NUC2 1H
PCPD2 80.00 usec
PL2 -0.50 dB
PL12 14.16 dB
PLM2 14.45810441 N
PL12M 14.45810441 N
PL12W 0.49444431 W
PL13M 0.24780917 W
SFO2 600.1324006 MHz

F2 - Processing parameters
SI 65536
SF 150.9076276 MHz
AQ 1.6777216 sec
RG 724
SFO 150.9251877 MHz
LB 2.00 Hz
GB 0
PC 1.00
  
```

176.55  
 151.13  
 143.23  
 119.25  
 117.93  
 101.49  
 101.32  
 75.10  
 72.43  
 72.18  
 68.42  
 62.66  
 49.42  
 49.28  
 49.14  
 49.00  
 48.86  
 48.71  
 48.57  
 40.34  
 20.70

DMF

DMF

190 180 170 160 150 140 130 120 110 100 90 80 70 60 50 40 30 20



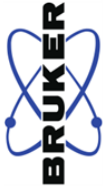

Current Data Parameters

NAME FCY-311-PEG-SH-0503  
 EXPNO 1  
 PROCNO 1

F2 - Acquisition Parameters

Date\_ 20230503  
 Time 12:02:39  
 INSTRUM spect  
 PROBH1 5 mm CPDCH 13C  
 PULPROG zg30  
 TD 32768  
 SOLVENT MeOD  
 NS 16  
 DS 4  
 SWH 8385.262 Hz  
 FIDRES 0.256020 Hz  
 AQ 1.9529728 sec  
 RG 22.6  
 DW 55.600 usec  
 DE 2.00 usec  
 TE 298.0 K  
 D1 2.00000000 sec  
 TDO 1

===== CHANNEL f1 =====

NUC1 1H  
 P1 12.00 usec  
 PL1 -0.90 dB  
 PL1W 15.85322522 W  
 SF01 600.1536010 MHz

F2 - Processing parameters

SI 16384  
 SF 600.1500000 MHz  
 WDW EM  
 SSB 0  
 LB 0 Hz  
 GB 0  
 FC 1.00

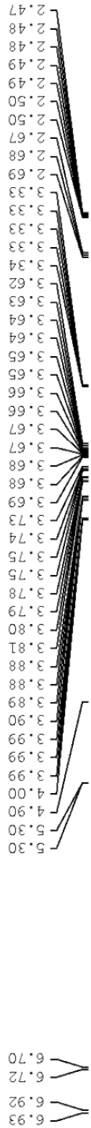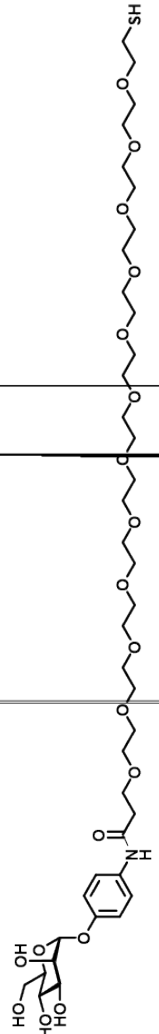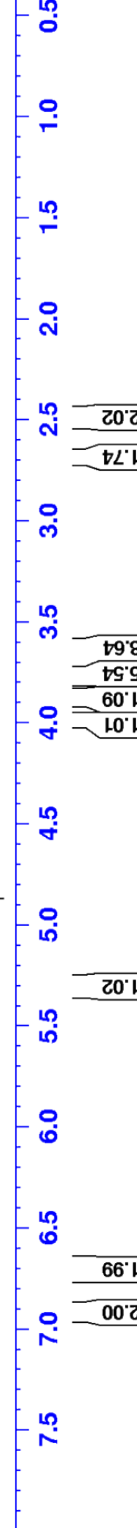

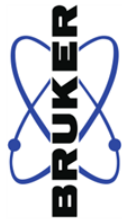

Current Data Parameters  
 NAME: FCF-311-989-9H-0503-C  
 EXPNO: 1  
 PROCNO: 1  
 F2 - Acquisition Parameters  
 Date\_ Time: 20230503 15.32  
 INSTRUM: spect  
 PULPROG: zgpg30  
 TD: 131072  
 NS: 400  
 DS: 4  
 SFR: 300.2500 MHz  
 FIDRES: 0.197216 sec  
 AQ: 1.677216 sec  
 RG: 575  
 DW: 12.800 usec  
 DE: 2.00 usec  
 TE: 298.0 K  
 D1: 2.0000000 sec  
 D11: 0.0300000 sec  
 D12: 0.0300000 sec  
 D13: 0.0300000 sec  
 D14: 0.0300000 sec  
 D15: 0.0300000 sec  
 D16: 0.0300000 sec  
 D17: 0.0300000 sec  
 D18: 0.0300000 sec  
 D19: 0.0300000 sec  
 D20: 0.0300000 sec  
 ===== CHANNEL f1 =====  
 NU1: 1  
 PL1: 14.25 usec  
 PL12: 4.40 dB  
 PL14: 31.74009702 W  
 SFO1: 150.9251677 MHz  
 ===== CHANNEL f2 =====  
 CPDPRG2: waltz16  
 NU2: 8  
 PCPD2: 80.00 usec  
 PL2: -0.20 dB  
 PL4: 12.16 dB  
 PL12: 12.16 dB  
 PL14: 12.16 dB  
 PL16: 12.16 dB  
 PL18: 12.16 dB  
 PL20: 12.16 dB  
 PL22: 12.16 dB  
 PL24: 12.16 dB  
 PL26: 12.16 dB  
 PL28: 12.16 dB  
 PL30: 12.16 dB  
 PL32: 12.16 dB  
 PL34: 12.16 dB  
 PL36: 12.16 dB  
 PL38: 12.16 dB  
 PL40: 12.16 dB  
 SFO2: 600.1325036 MHz  
 F2 - Processing parameters  
 SF: 150.9076264 MHz  
 NS: 65316  
 NSW: 81  
 DS: 4  
 LB: 2.00 Hz  
 GB: 0  
 PC: 1.00

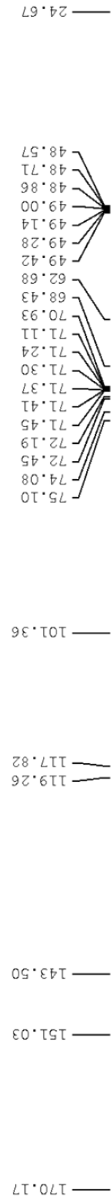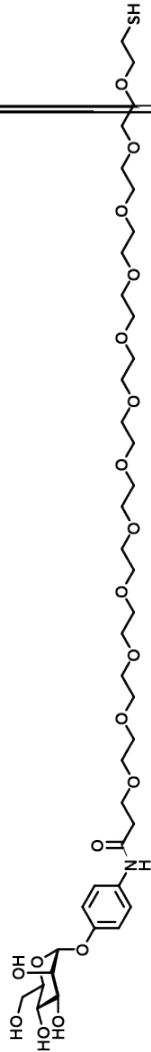

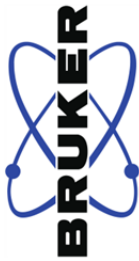

```

Current Data Parameters
NAME      FCY-314-SH-H
PROCNO    1
F2 - Acquisition Parameters
Date_     20230418
Time      17.27
INSTRUM   spect
PROBHD    5 mm CPDCH
PULPROG   zg30
TD        32768
SOLVENT   MeOD
NS         10
DS         0
SWH        8386.262 Hz
FIDRES     1.9529728 Hz
AQ         1.9529728 sec
RG         25.4
DW         59.600 usec
DE         21.00 usec
TE         298.0 K
TB         0
TD0        2.00000000 sec

===== CHANNEL f1 =====
NUC1       1H
P1         12.75 usec
PL1        0.00 dB
PL12       0.00 dB
PL13       0.00 dB
SFO1       600.1356010 MHz

F2 - Processing parameters
SI         16384
SF         600.1500000 MHz
WDW        EM
SSB        0
LB         0 Hz
GB         0
PC         1.00
  
```

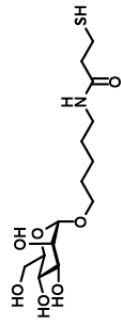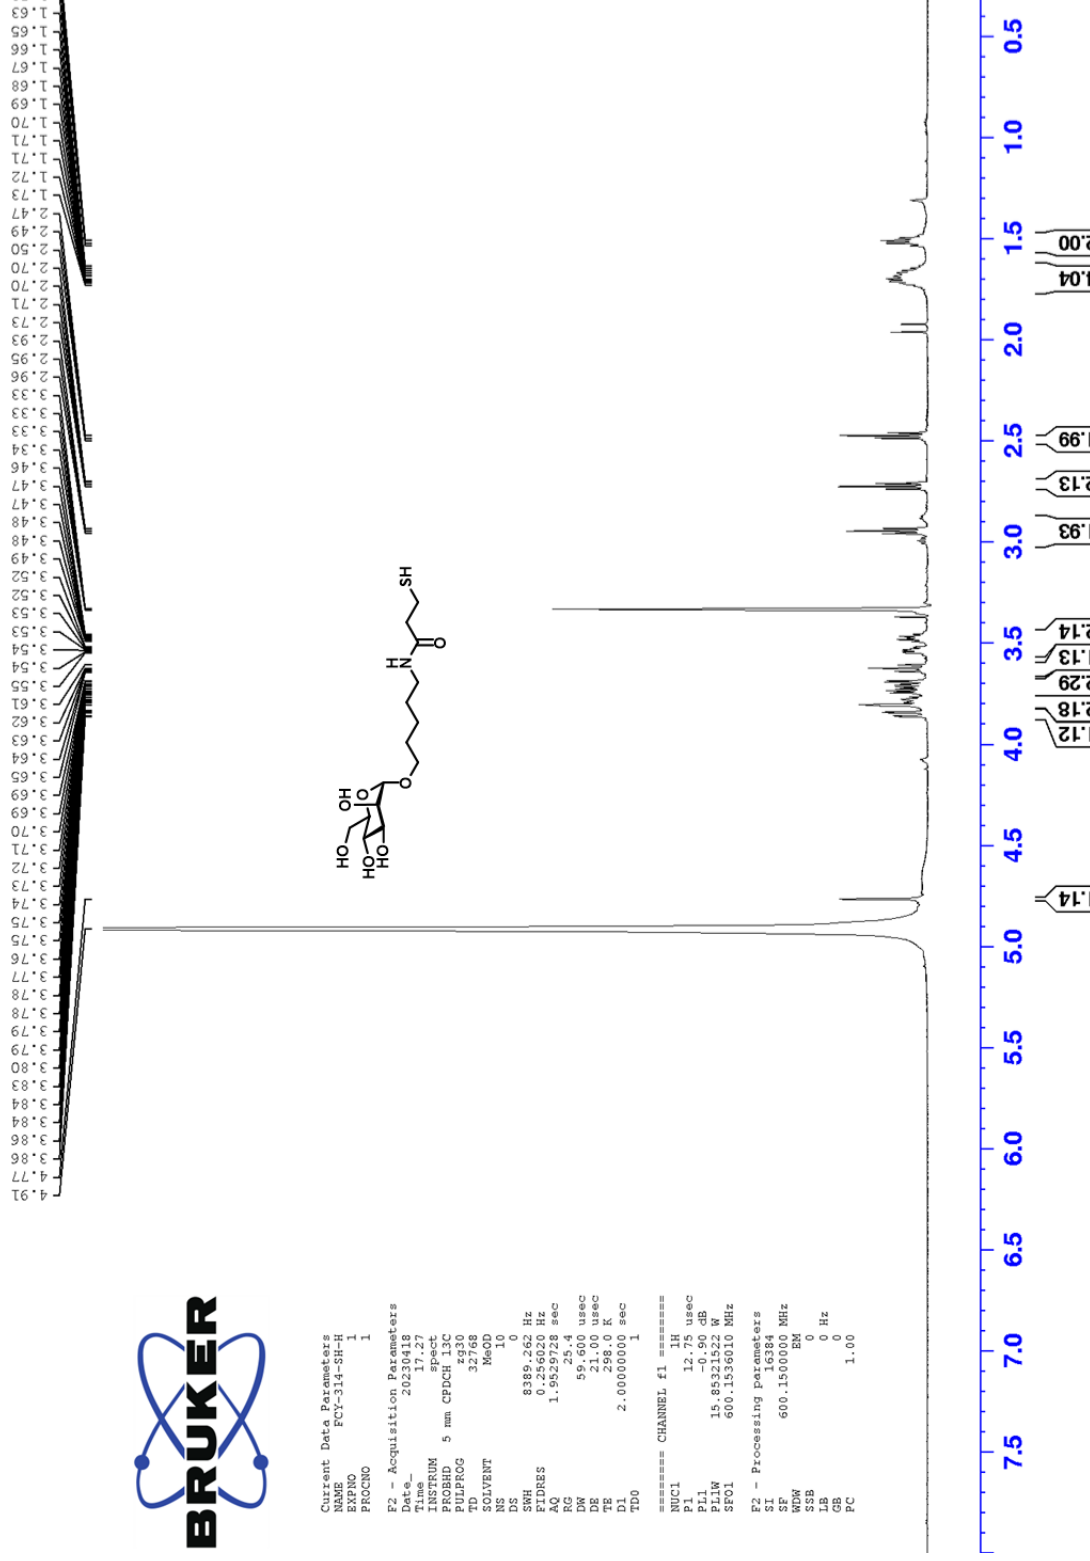



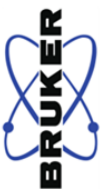

```

Current Data Parameters
NAME      FCY-314-PEG-SH-C
EXPNO     1
PROCNO    1

F2 - Acquisition Parameters
Date_     20230418
Time      18.56
INSTRUM   spect
PROBHD    5 mm CPOCH 13C
PULPROG   zgpg30
TD        131072
AQ        1.29
RG        29
DS        0
SWH       39062.500 Hz
AQRES     0.30471 Hz
RGRES     1.077216 sec
RG         724
DN         12.800 usec
TE        300.2 K
TE2       260 usec
D1         2.00000000 sec
D11        0.03000000 sec
TD0        1

===== CHANNEL f1 =====
NUC1       13C
P1         14.25 usec
PL1        0.00 dB
PL1W       31.7470702 W
SF01       150.9451877 MHz

===== CHANNEL f2 =====
CPDPRG12   waltz16
NUC2
PCPD2      80.00 usec
PL2        0.50 dB
PL2W       17.16 dB
PL13       17.16 dB
PL1W       17.16 dB
PL2W       14.45830441 W
PL12W      0.4944431 W
PL13W      0.4944431 W
SF02       600.1324006 MHz

F2 - Processing parameters
SI         32768
SF         150.9078380 MHz
RG         1
PC         2.00 Hz
SFB        1.00
  
```

171.01

72.72  
70.57  
69.99  
69.24  
69.04  
67.90  
67.39  
66.73  
60.92  
39.36  
37.57

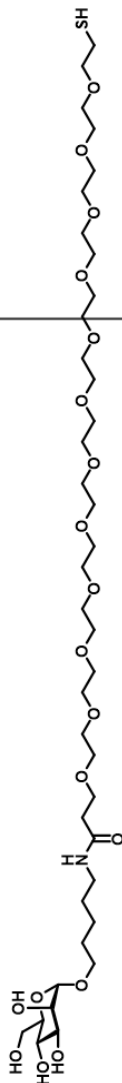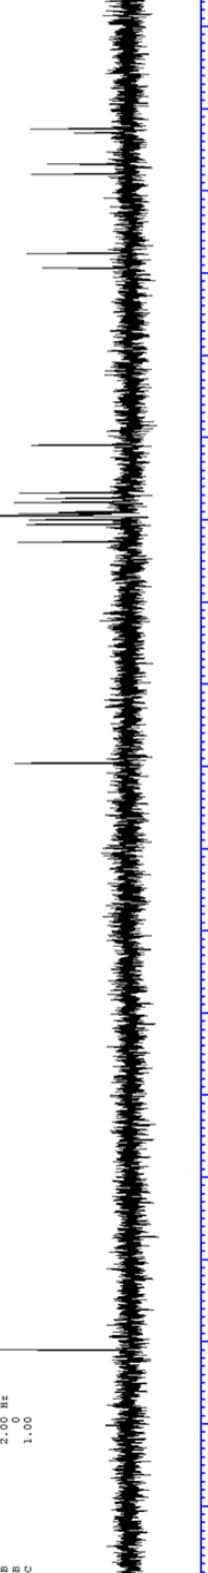

2.17  
2.03  
2.02  
2.01

4.03  
4.04  
4.05  
4.06  
4.07  
4.08  
4.09  
4.11  
4.12  
4.24  
4.25  
4.26  
4.27  
5.17  
5.32  
5.33  
5.35  
5.41  
5.41  
5.41  
5.43  
5.44  
5.51  
5.52  
5.53  
5.55

7.00  
7.01  
7.01  
7.02  
7.02  
7.03  
7.24  
7.28  
7.30  
7.31  
7.31  
7.31  
7.32  
7.32  
7.33  
7.33  
7.33  
7.35  
7.35

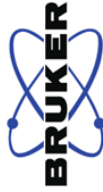

Current Data Parameters  
 NAME FCY-311-0317  
 EXPNO 1  
 PROCNO 1  
 F2 - Acquisition Parameters  
 Date\_ 20230317  
 Time 11:24  
 INSTRUM spect  
 PROBHD 5 mm CPDCH 13C  
 PULPROG zg30  
 TD 32768  
 NS 15  
 NS2 15  
 DS 4  
 SWH 8389.262 Hz  
 FIDRES 0.256020 Hz  
 AQ 1.9529728 sec  
 RG 56.22.6  
 SFO1 600.1536010 MHz  
 DE 211.00 usec  
 TE 298.1 K  
 D1 2.40000000 sec  
 TD0 1  
 ===== CHANNEL f1 =====  
 NUC1 <sup>13</sup>C  
 P1 12.75 usec  
 PL1 -0.90 dB  
 PL1W 15.85321522 W  
 SFO1 600.1536010 MHz  
 F2 - Processing parameters  
 SI 32768  
 SF 600.1500283 MHz  
 WDW EM  
 SSB 0  
 LB 0 Hz  
 GB 0  
 PC 1.00

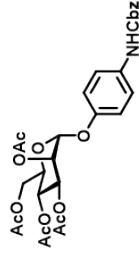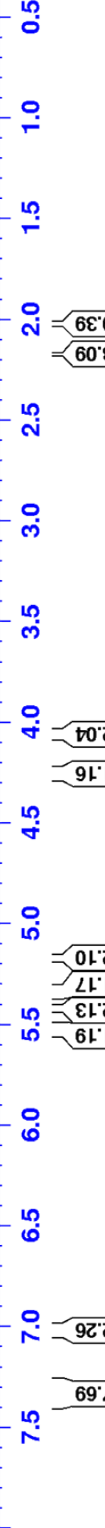

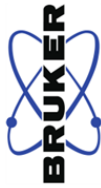

Current Data Parameters  
 NAME FCY-311-0317-C  
 PROCNO 1  
 F2 - Acquisition Parameters  
 Date\_ Time 20230317 11:31  
 INSTRUM spect  
 PROBHD 5 mm QNP1H  
 PULPROG zgpg30  
 TD 131072  
 SOLVENT CDCl3  
 NS 0  
 DS 0  
 SMH 39662.500 Hz  
 FIDRES 0.258023 Hz  
 AQ 1.677764 sec  
 RG 645  
 DN 12.800 usec  
 DE 2.00 usec  
 TE 298.2 K  
 D1 2.0000000 sec  
 D11 0.0300000 sec  
 ED0 1  
 ===== CHANNEL f1 =====  
 NUC1 13C  
 P1 130 usec  
 PL1 0.00 dB  
 PL2 4.40 dB  
 PLM 31.74709702 M  
 SFO1 100.621877 MHz  
 ===== CHANNEL f2 =====  
 GDEPRG(2) waltz16  
 NUC2 1H  
 P2P2 80.00 usec  
 PL2 -0.50 dB  
 PL12 14.16 dB  
 PL22 14.16 dB  
 PLM 14.43830441 M  
 SFO2 499.1324066 MHz  
 F2 - Processing parameters  
 SI 32768  
 SF 100.621877 MHz  
 WDM BM  
 SSB 0  
 GB 0  
 PC 1.00

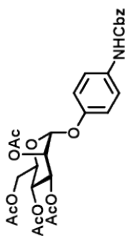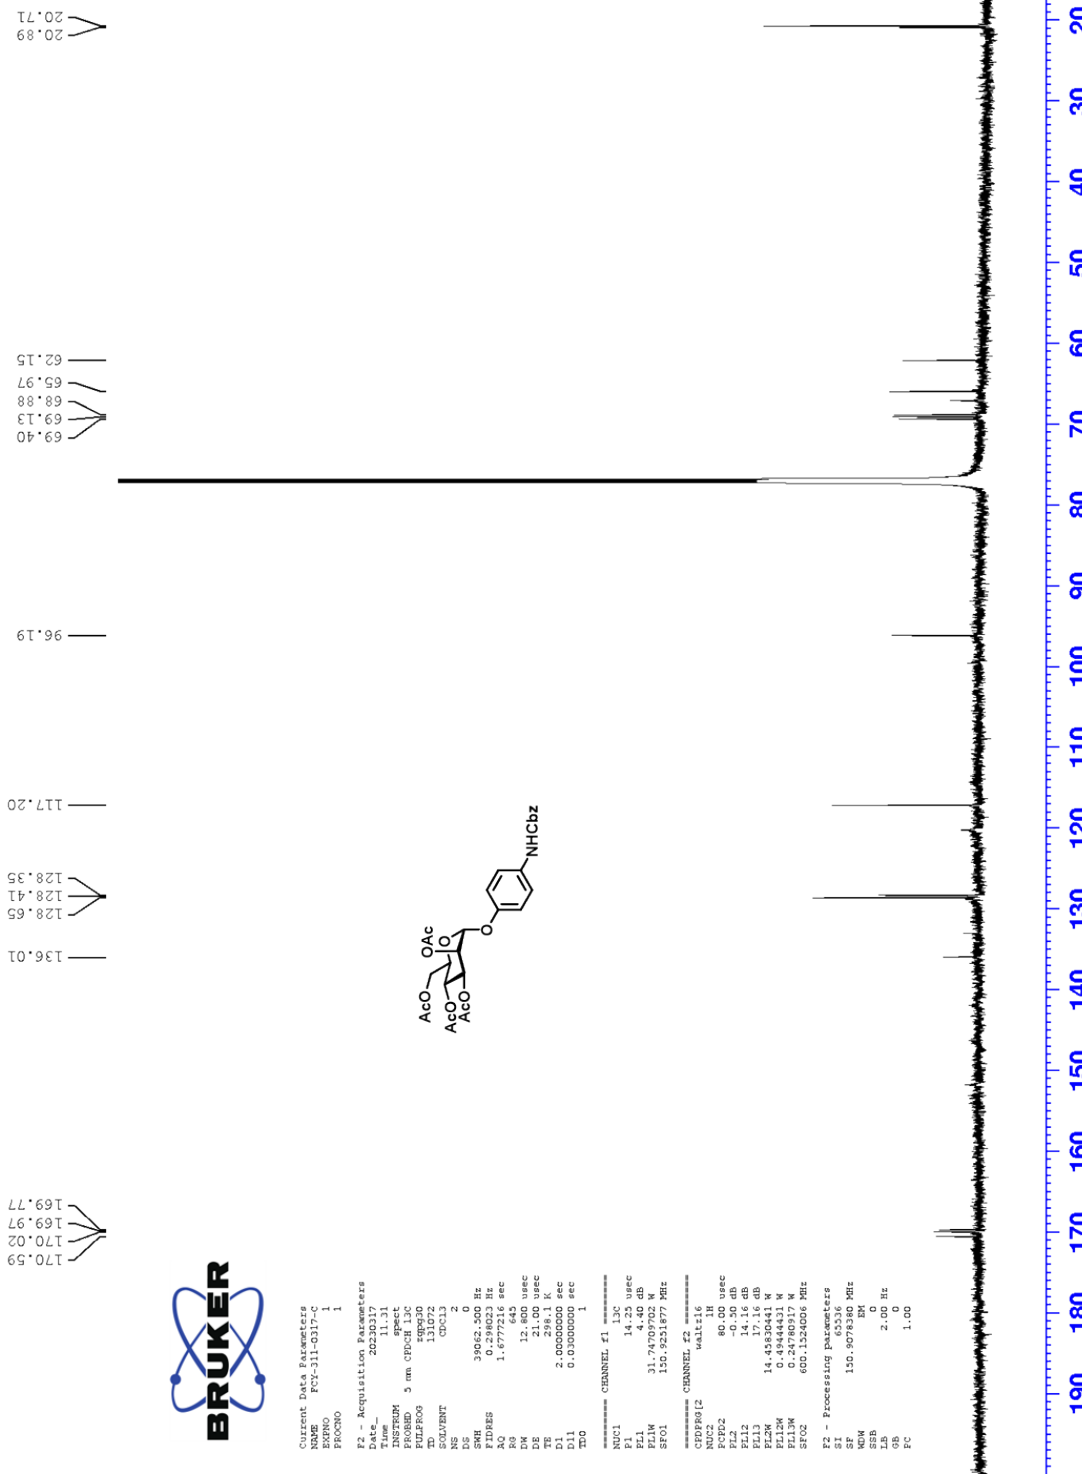





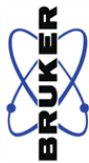

```

Current Data Parameters
NAME      FCY-318-C
EXPNO    1
PROCNO   1

F2 - Acquisition Parameters
Date_    20230327
Time     12:00:00
INSTRUM spect
PROBHD   5 mm CPDCH 13C
PULPROG zgpg30
PC       13CQ17
SOLVENT  CDCl3
NS       31
DS       0
SWH      38062.500 Hz
AQ       0.279372 Hz
RG       1.977772 sec
RG       724
DW       12.800 usec
DE       21.00 usec
DI       2.0000000 Ksec
D11      0.0300000 sec
TD0      1

===== CHANNEL f1 =====
NUC1     13C
P1       14.25 usec
PL1     4.40 dB
PL12    31.74709702 W
SFO1     100.628167 MHz

===== CHANNEL f2 =====
CPDPRG2  waltz16
NUC2     1H
P2       80.0 usec
PL2     -0.50 dB
PL12    14.16 dB
PL13    17.16 dB
PL14    48.0441 W
PL15    0.24789917 W
SFO2     400.1524006 MHz

F2 - Processing Parameters
SF       150.9078380 MHz
WDW      EM
SSB      0
GB       2.00 Hz
PC       1.00
  
```

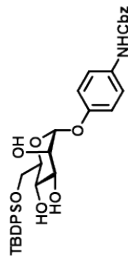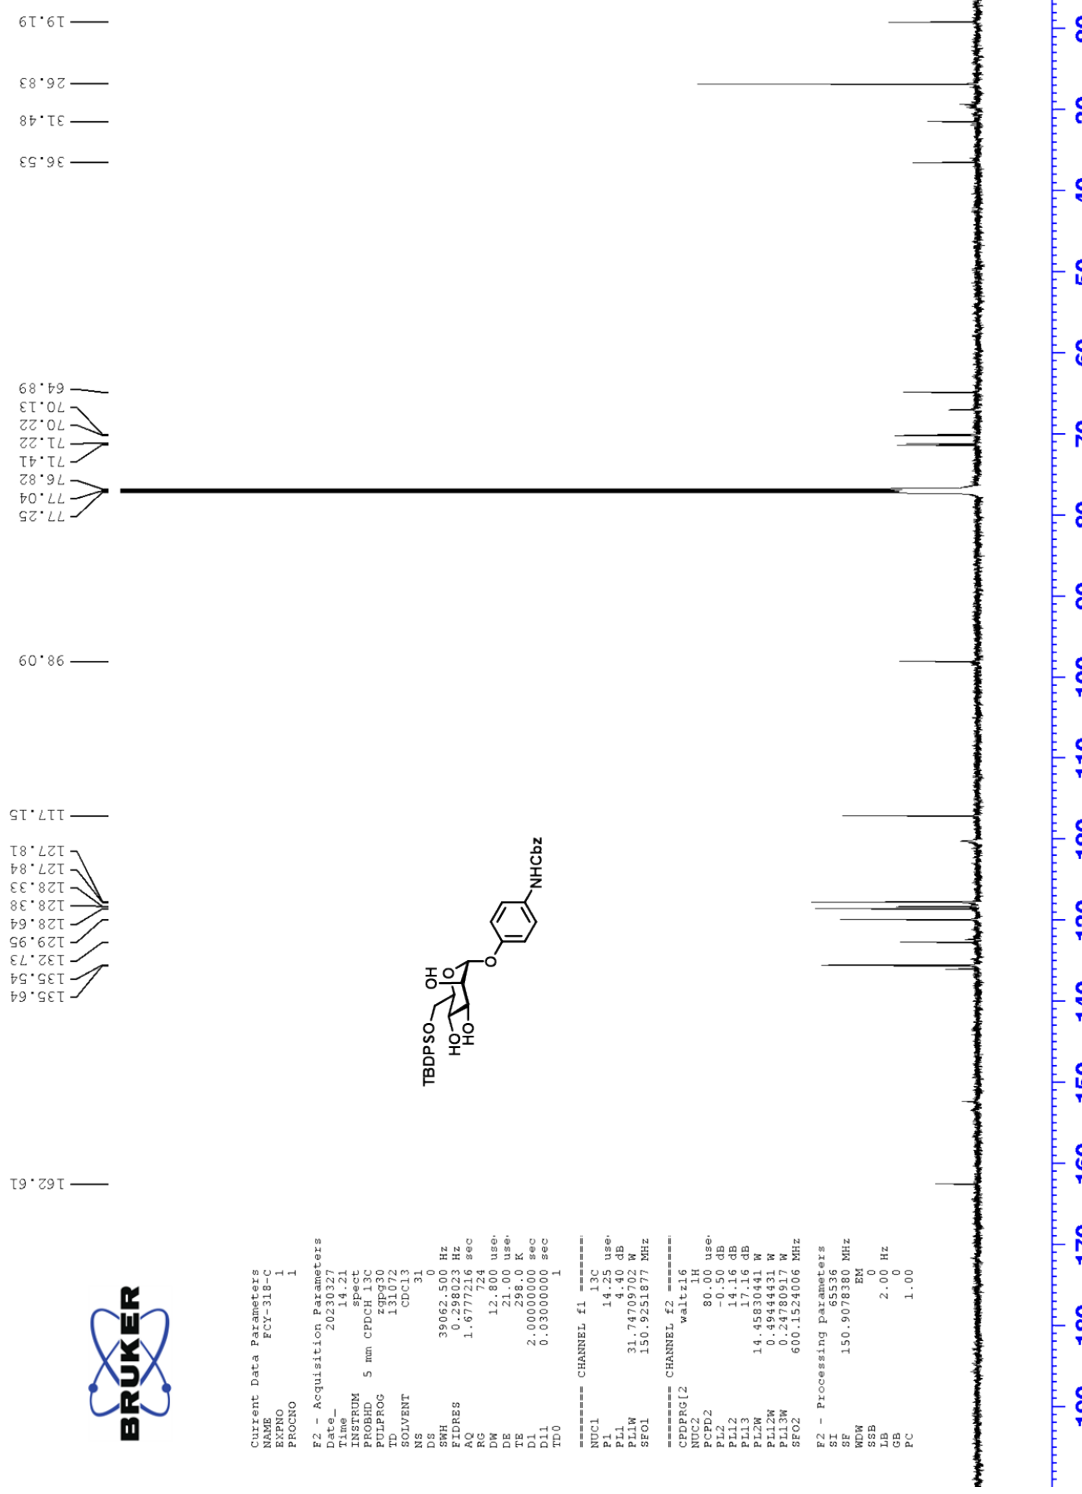

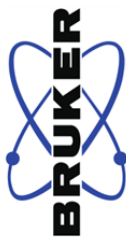

Current Data Parameters  
NAME FCY-321  
EXPNO 1  
PROCNO 1

F2 - Acquisition Parameters  
Date\_ 20230406  
Time 16.20  
INSTRUM spect  
PROBHD 5 mm CPDCH 13C  
PULPROG zg30  
TD 32768  
SOLVENT CDCl3  
NS 8  
DS 0  
SWH 8389.262 Hz  
FIDRES 0.256020 Hz  
AQ 1.9529728 sec  
RG 18  
DW 59.600 usec  
DE 21.00 usec  
TE 298.0 K  
D1 2.00000000 sec  
TD0 1

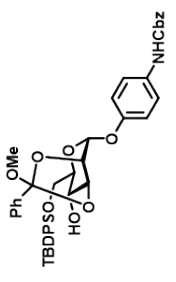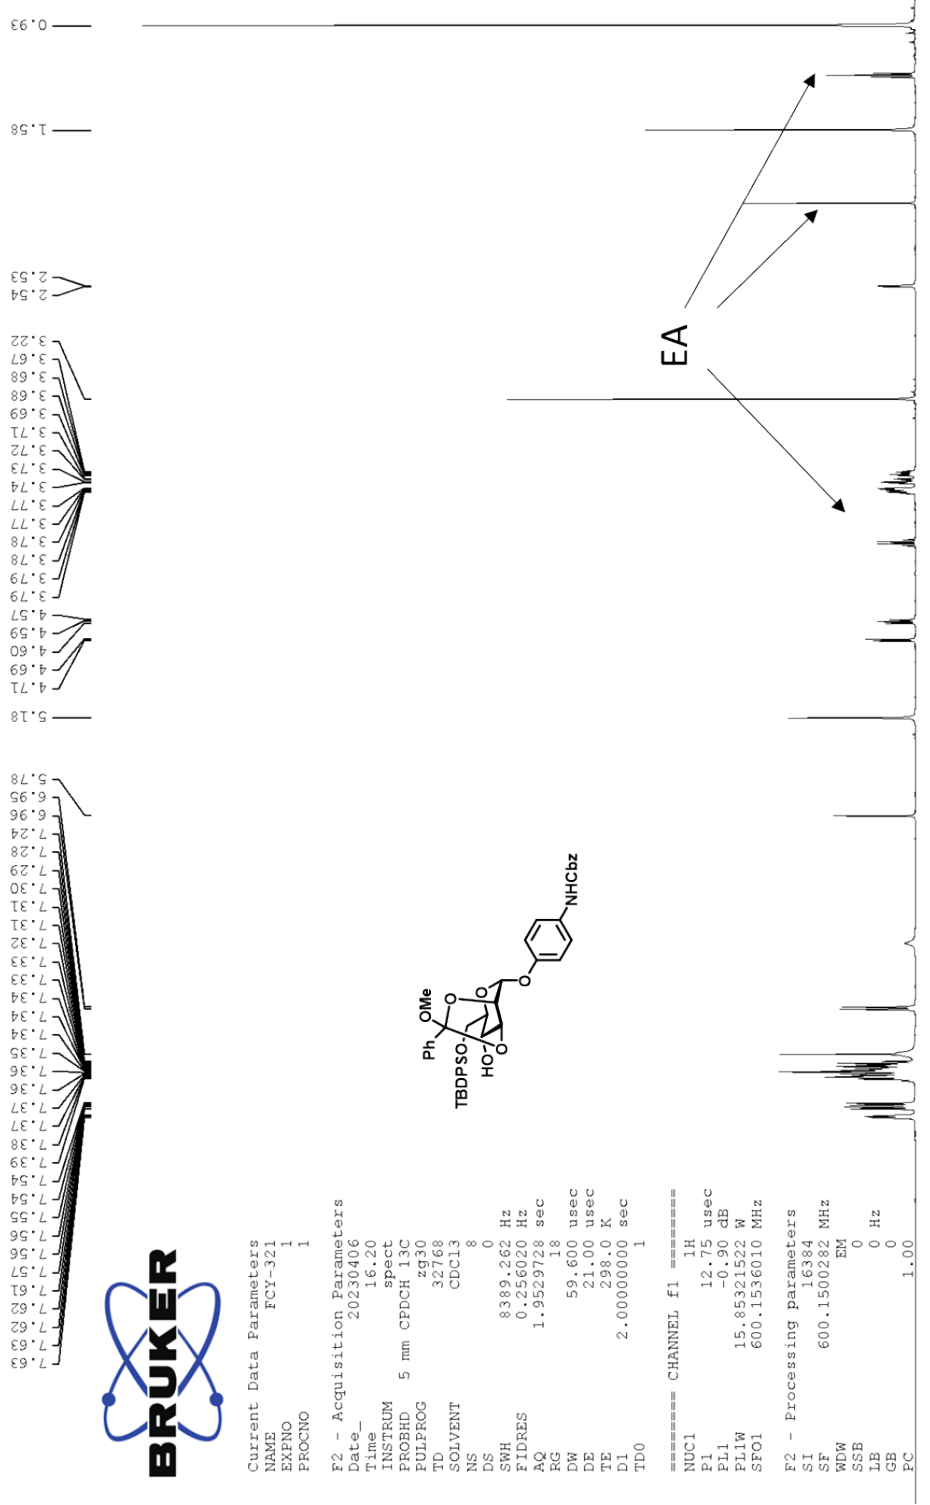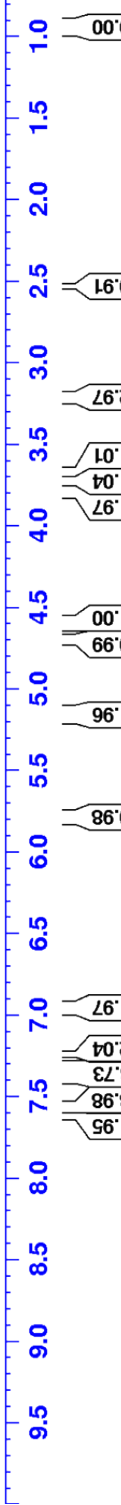

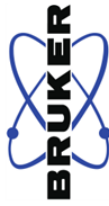

```

Current Data Parameters
NAME      FCY-321-C
EXPNO     1
PROCNO    1
Date_     20230406
Time      16.21
INSTRUM   spect
PROBHD    5 mm CPDCHX-13
PULPROG   zgpg30
TD         131072
SOLVENT   CDCl3
NS         51
DS         4
SWH        39062.500 Hz
FIDRES     0.298023 Hz
AQ         1.6777216 sec
RG         456
RG2        456
DE         21.00 usec
TE         298.0 K
D1         2.00000000 sec
D11        0.30000000 sec
TD0        1
  
```

```

===== CHANNEL f1 =====
NUC1      13C
P1        14.00 usec
PL1       -0.50 dB
PL12      17.16 dB
PL13      17.16 dB
PL14      17.16 dB
PL15      17.16 dB
PL16      17.16 dB
PL17      17.16 dB
PL18      17.16 dB
PL19      17.16 dB
PL20      17.16 dB
PL21      17.16 dB
PL22      17.16 dB
PL23      17.16 dB
PL24      17.16 dB
PL25      17.16 dB
PL26      17.16 dB
PL27      17.16 dB
PL28      17.16 dB
PL29      17.16 dB
PL30      17.16 dB
===== CHANNEL f2 =====
CPDPRG2   waltz16
NUC2      13C
PCPD2     80.00 usec
PL2       -0.50 dB
PL22      17.16 dB
PL23      17.16 dB
PL24      17.16 dB
PL25      17.16 dB
PL26      17.16 dB
PL27      17.16 dB
PL28      17.16 dB
PL29      17.16 dB
PL30      17.16 dB
===== Processing parameters =====
SI         65536
SF         150.9078380 MHz
WDW         EM
SSB         0
LB         0
GB         0
LB2        2.00 Hz
GB2        0
PC         1.00
  
```

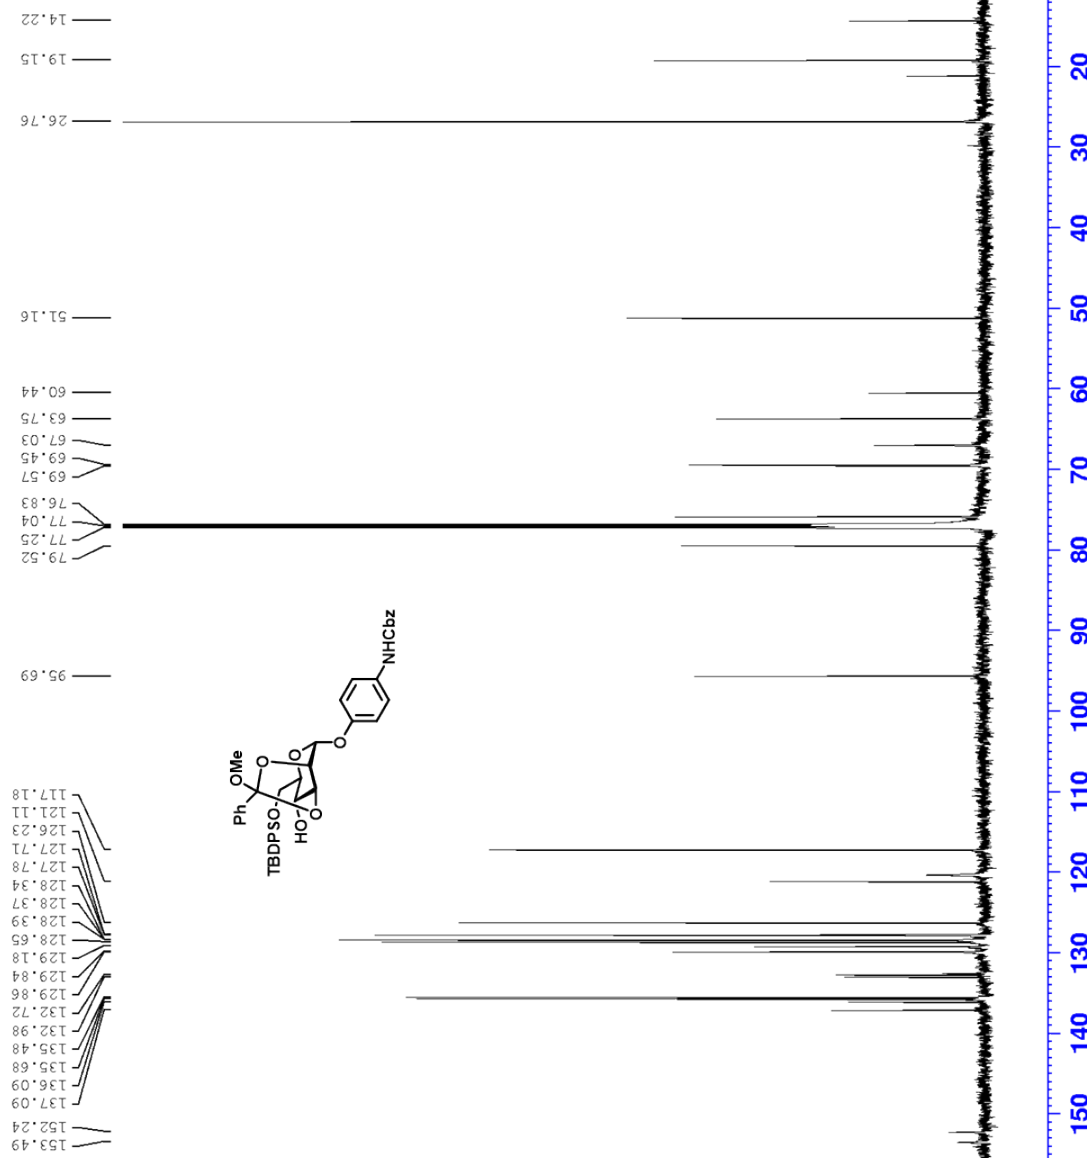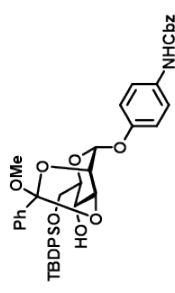

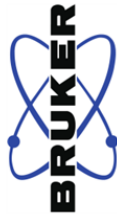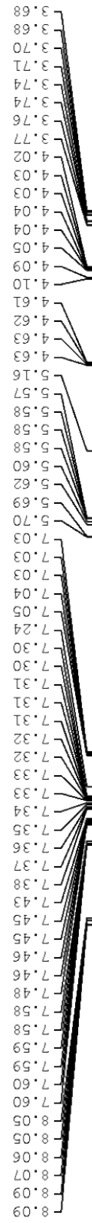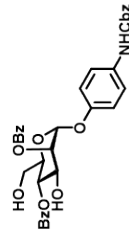

Current Data Parameters  
 NAME FCY-323  
 EXPNO 1  
 PROCNO 1  
 F2 - Acquisition Parameters  
 Date\_ 20020411  
 Time 14.15  
 INSTRUM spect  
 PROBHD 5 mm CPDCH 13C  
 PULPROG zgpg30  
 TD 32768  
 SOLVENT CDCl3  
 NS 13  
 DS 0  
 SWH 8389.262 Hz  
 FIDRES 0.256020 Hz  
 AQ 1.9529728 sec  
 RG 400  
 DW 59.00 usec  
 DE 21.00 usec  
 TE 298.0 K  
 D1 2.00000000 sec  
 TDO 1  
 ===== CHANNEL f1 =====  
 NUC1 1H  
 P1 12.75 usec  
 PL1 -0.90 dB  
 PLLW 15.85321522 W  
 SFO1 600.1536010 MHz  
 F2 - Processing Parameters  
 SI 6384  
 SF 600.1500286 MHz  
 WDW EM  
 SSB 0  
 LB 0 Hz  
 GB 0  
 PC 1.00

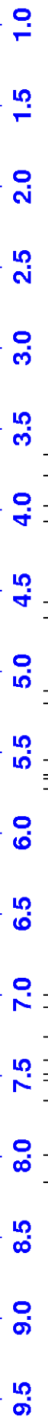

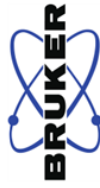

```

Current Data Parameters
NAME      FCY-323-C
EXPNO    1
PROCNO   1

F2 - Acquisition Parameters
Date_    20230411
Time     14.17
INSTRUM  spect
PROBHD   5 mm CPDCH 13C
PULPROG  zgpg30
SOLVENT  DMSO
NS       9
DS       0
SWH      39062.500 Hz
FIDRES   0.298023 Hz
AQ       1.677756 sec
RG       327
DW       12.800 usec
DE       21.00 usec
TE       298.0 K
D1       2.00000000 sec
D11      0.03000000 sec
TD0      1

===== CHANNEL f1 =====
NUC1     13C
P1       14.25 usec
PL1      4.40 dB
PL12     31.74750000 MHz
SFO1     150.9251877 MHz

===== CHANNEL f2 =====
CPDPRG2  waltz16
NUC2     1H
P2       80.00 usec
PL2      0.00 dB
PL12     14.16 dB
PL13     17.16 dB
PL2W     14.45830441 W
PL1ZW   0.49444431 W
PL1LW   0.24780917 W
SFO2     600.1324006 MHz

F2 - Processing parameters
SI       65536
SF       150.9078380 MHz
WDW      EM
SS       0
LB       2.00 Hz
GB       0
PC       1.00
  
```

167.42  
166.05  
153.55  
152.01  
136.03  
133.84  
133.76  
130.00  
129.09  
128.96  
128.69  
128.65  
128.62  
128.39  
117.11  
96.18  
77.26  
77.05  
76.84  
72.61  
71.30  
70.01  
68.53  
61.16

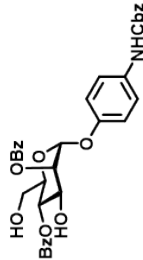

5.48  
5.19  
4.80  
4.76  
4.53  
4.14  
4.13  
4.12  
4.11  
3.96  
3.93  
3.91  
3.90  
3.89  
3.88  
3.87  
3.84  
3.83  
3.81  
3.80  
3.79  
3.78  
3.77  
3.75  
3.73  
3.71  
3.69  
3.68  
3.66  
3.64

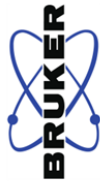

Current Data Parameters  
 Name FCI-327-2D all  
 EXPNO 1  
 PROCNO 1  
 F2 - Acquisition Parameters  
 Date\_ 20230427  
 Time 18.24 h  
 INSTRUM spect  
 F2PROG 275812\_0018 C  
 PULPROG zgpg30  
 TD 32768  
 SOLVENT D2O  
 NS 16  
 DS 0  
 SWH 8370.536 Hz  
 FIDRES 0.510897 Hz  
 AQ 1.9573419 sec  
 RG 327.68  
 DW 59.733 usec  
 DE 22.00 usec  
 TE 298.0 K  
 D1 2.00000000 sec  
 TD0 1  
 SF01 600.1336009 MHz  
 NUC1 13C  
 P1 9.30 usec  
 PL1 6.0953986 W  
 F2 - Processing Parameters  
 SI 16384  
 SF 600.1299406 MHz  
 WDW EM  
 SSB 0 Hz  
 GB 0 Hz  
 EC 1.00

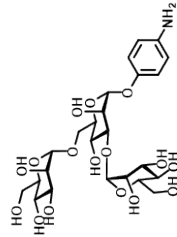

7.04  
7.03  
6.89  
6.87

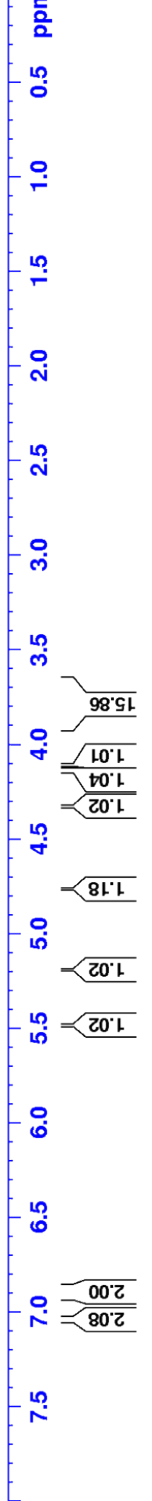

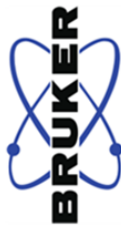

Current Data Parameters  
 NAME FCY-327-2D all  
 EXPNO 6  
 PROCNO 1

F2 - Acquisition Parameters  
 Date\_ 20230428  
 Time 1.44 h  
 INSTRUM spect  
 PROBHD 278812\_0018 (C  
 PULPROG zgpg30  
 TD 131072  
 SOLVENT D2O  
 DS 5000  
 DE 12.800  
 SSF 39062.500 Hz  
 SF 0.4596046 Hz  
 FIDRES 1.6777216 sec  
 AQ 2050  
 RG 12.800 usec  
 DW 18.00 usec  
 DE 298.0 K  
 TE 2.00000000 sec  
 D1 0.03000000 sec  
 D11 150.9201510 MHz  
 SFO1 13C  
 NUC1 13C  
 P1 10.95 usec  
 PLW1 113.4000000 W  
 SFO2 600.1324005 MHz  
 NUC2 1H  
 waltz16  
 CPDPRG2  
 PCPD2 70.00 usec  
 PLW2 6.09639986 W  
 PLW12 0.10078900 W  
 PLW13 0.05068200 W

F2 - Processing parameters  
 SI 65536  
 SF 150.9023912 MHz  
 WDW EM  
 SSB 0  
 LB 2.00 Hz  
 GB 0  
 PC 1.00

151.38  
 143.39  
 121.23  
 120.70  
 105.19  
 101.60  
 101.39  
 80.93  
 76.13  
 75.38  
 74.04  
 73.27  
 73.12  
 72.79  
 72.66  
 72.22  
 69.50  
 69.41  
 68.70  
 67.90  
 63.71  
 63.65

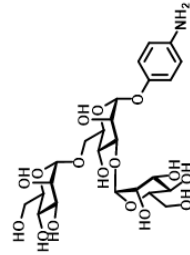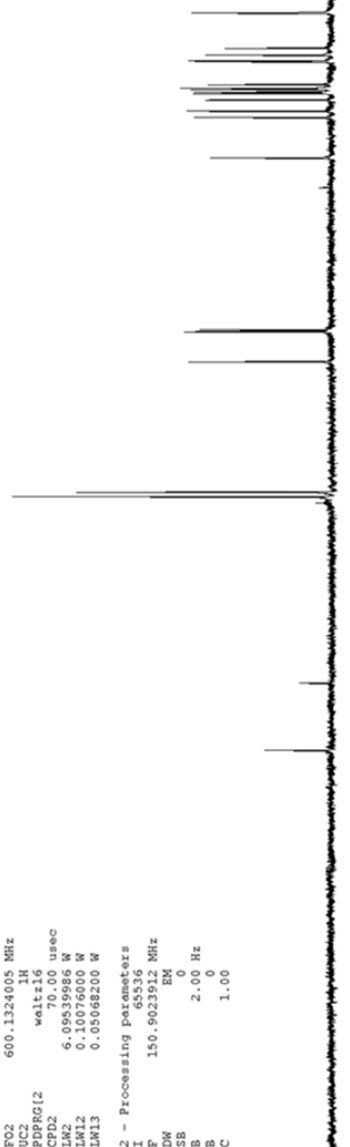

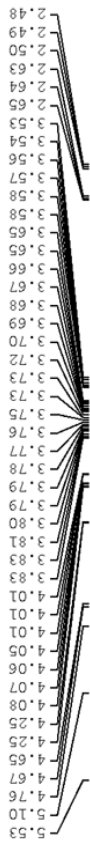

7.21  
7.20  
7.14  
7.12

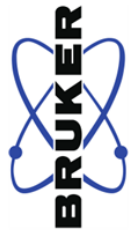

Current Data Parameters  
 NAME FCY-327-PPB-0427-2  
 EXPRNO 1  
 PROCNO 1  
 F2 - Acquisition Parameters  
 Date\_ 20230428  
 Time 15.05  
 INSTRUM spect  
 PULPROG 5 mm CPMCH 420  
 TD 32768  
 SOLVENT D2O  
 DS 0  
 SFR 8389.262 Hz  
 FIDRES 0.256020 Hz  
 RG 1.925978 sec  
 RW 59.600 usec  
 DE 21.00 usec  
 TE 296.0 K  
 TD0 2.0000000 sec  
 ===== CHANNEL f1 =====  
 NUC1 1H  
 P1 12.75 usec  
 PL1 -0.90 dB  
 P1W 15.85231522 W  
 SFO1 600.136010 MHz  
 F2 - Processing parameters  
 SI 16384  
 SF 600.1360000 MHz  
 KW 0  
 LB 0 Hz  
 GB 0  
 PC 1.00

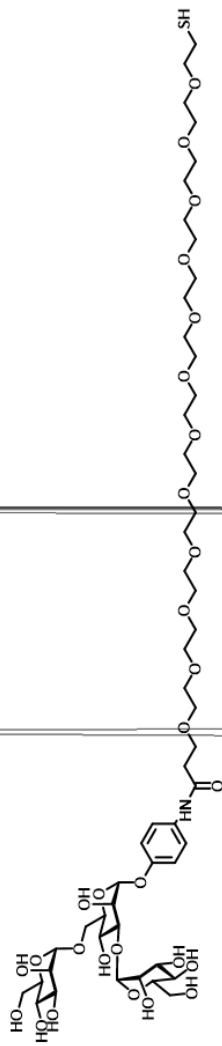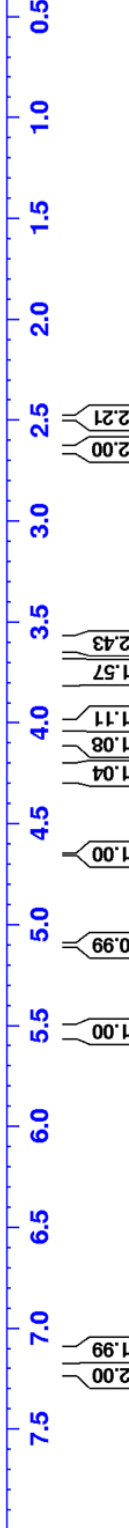

7.20  
1.99  
7.0

2.00  
1.04  
1.08  
1.11  
1.57  
2.43  
3.0  
3.5  
4.0  
4.5  
5.0  
5.5  
6.0  
6.5  
7.0  
7.5



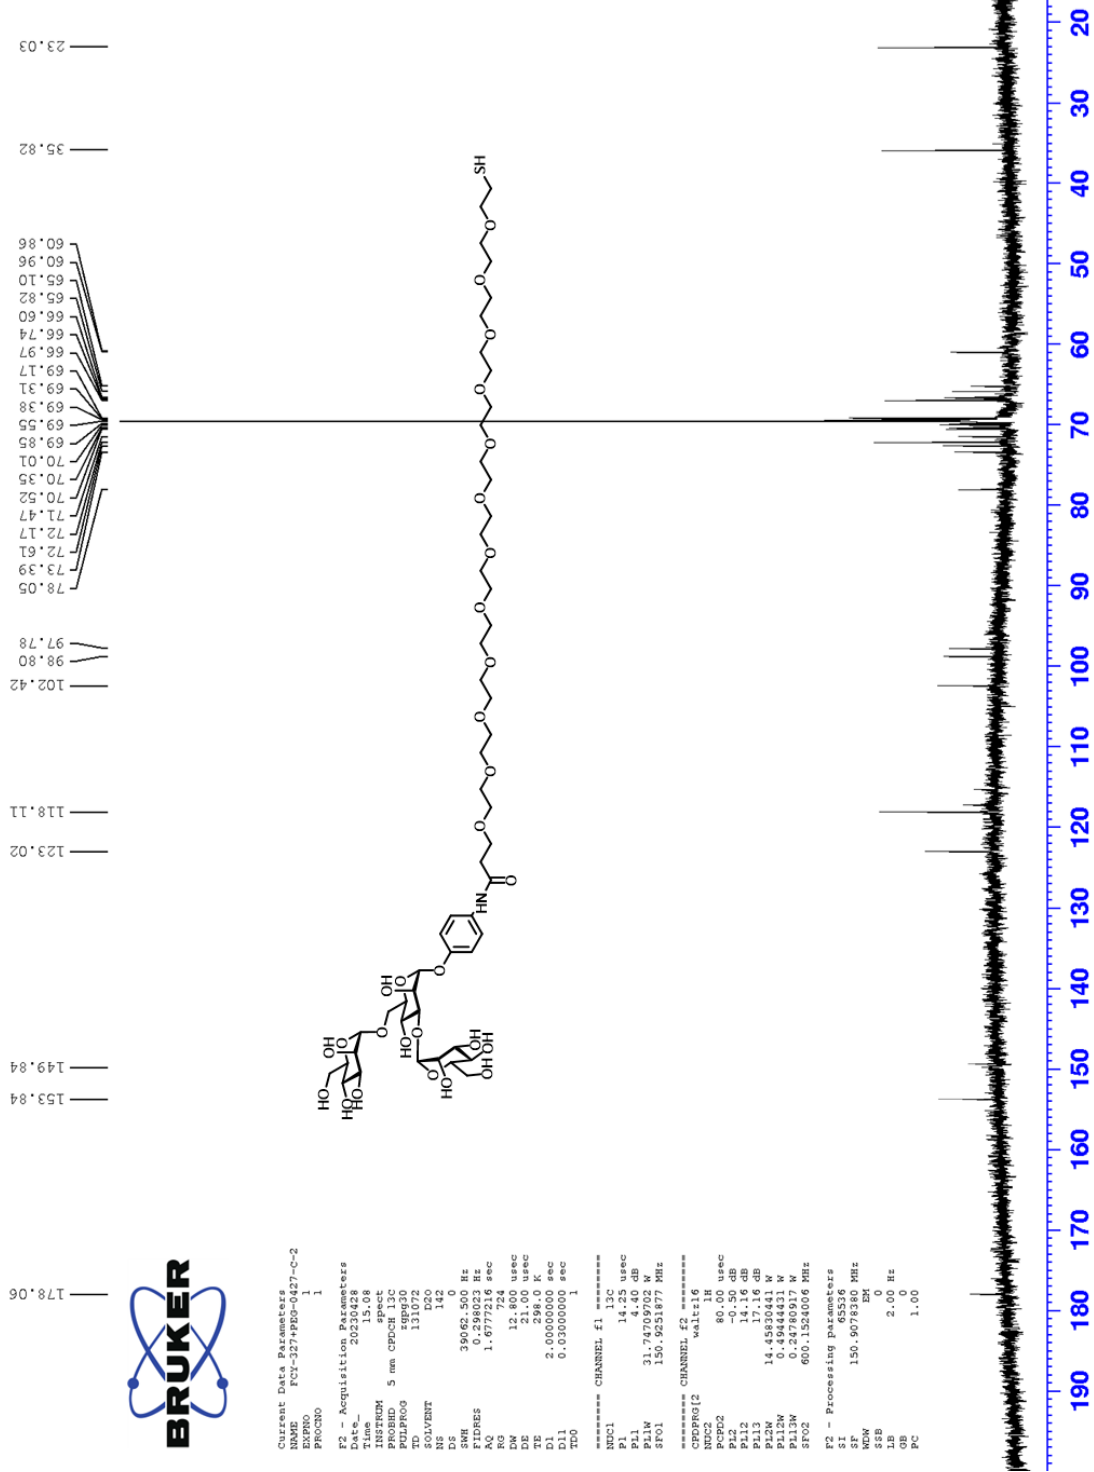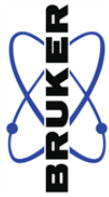

Current Data Parameters  
 NAME FCY-327-PDE-0427-C-2  
 EXPRO 1  
 PROCNO 1  
 F2 - Acquisition Parameters  
 Date\_ 20230428  
 Time 15:08  
 SampleName  
 PULPROG 5 mm CPDCH 13C  
 PULPROG 5mmg30  
 TD 131072  
 SFO1 125.130  
 SOLVENT DMS  
 DS 0  
 SWH 39062.500 Hz  
 FIDRES 0.49715 Hz  
 AQRES 1.077216 sec  
 RG 724  
 DW 12.800 usec  
 DE 1.500 usec  
 TE 300.2 K  
 D1 2.0000000 sec  
 D11 0.0300000 sec  
 TDO 1  
 ===== CHANNEL f1 =====  
 NUC1 13C  
 P1 14.25 usec  
 PL1 0.00 dB  
 SFO1 125.130 MHz  
 SFO2 150.9531877 MHz  
 ===== CHANNEL f2 =====  
 CPDPRG2 waltz16  
 NUC2 1H  
 PCPD2 80.00 usec  
 P12 0.50 dB  
 PL12 17.16 dB  
 PL13 17.16 dB  
 PL2M 14.45820441 W  
 PL12M 0.4844431 W  
 PL2M 14.45820441 W  
 SFO2 600.1524000 MHz  
 F2 - Processing parameters  
 SI 32768  
 SF 150.9078380 MHz  
 WDW EM  
 SSB 0  
 GB 2.00 Hz  
 PC 1.00



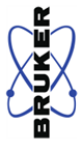

Current Data Parameters  
 NAME FCY-343-C  
 EXPNO 1  
 PROCNO 1  
 F2 - Acquisition Parameters  
 Date\_ 20230616  
 Time 14.19  
 INSTRUM spect  
 PROBHD 5 mm CPDPRG13C  
 PULPROG zgpg30  
 TD 131072  
 SOLVENT CDCl3  
 DS 2  
 ZF 1  
 SWH 39062.500 Hz  
 FIDRES 0.298023 Hz  
 AQ 1.6777216 sec  
 SFO1 150.9251877 MHz  
 DM 12.800 usec  
 DE 21.00 usec  
 TE 297.9 K  
 D1 2.0000000 sec  
 DELT 0.0300000 sec  
 TD0 1

===== CHANNEL f1 =====  
 NUC1 13C  
 P1 14.00 usec  
 PL1 4.20 dB  
 PL1W 31.74705702 W  
 SFO1 150.9251877 MHz  
 ===== CHANNEL f2 =====  
 CPDPRG12 waltz16  
 NUC2 1H  
 PCPD2 80.00 usec  
 PL2 -0.50 dB  
 PL2W 11.16 dB  
 PL13 11.16 dB  
 PL12W 14.45830441 W  
 PL12M 0.4944431 W  
 PL13M 0.54780917 W  
 SFO2 600.1324008 MHz  
 F2 - Processing Parameters  
 SI 65536  
 SF 150.9075458 MHz  
 SFO 600.1324008 MHz  
 GB 2.00 Hz  
 LB 0  
 PC 1.00

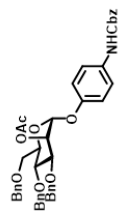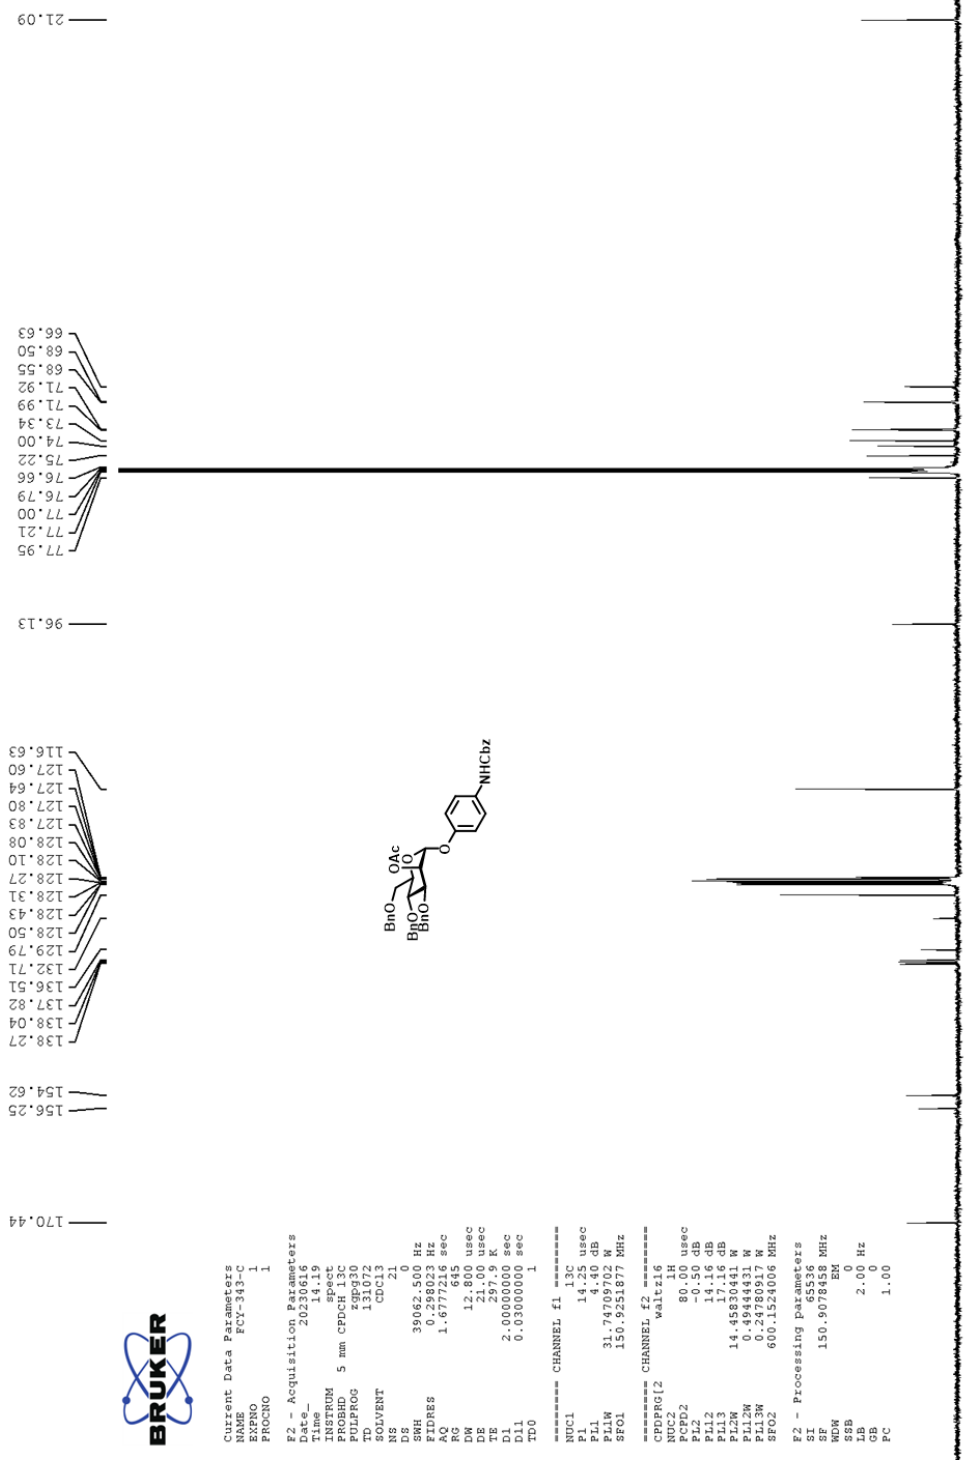

190 180 170 160 150 140 130 120 110 100 90 80 70 60 50 40 30 20

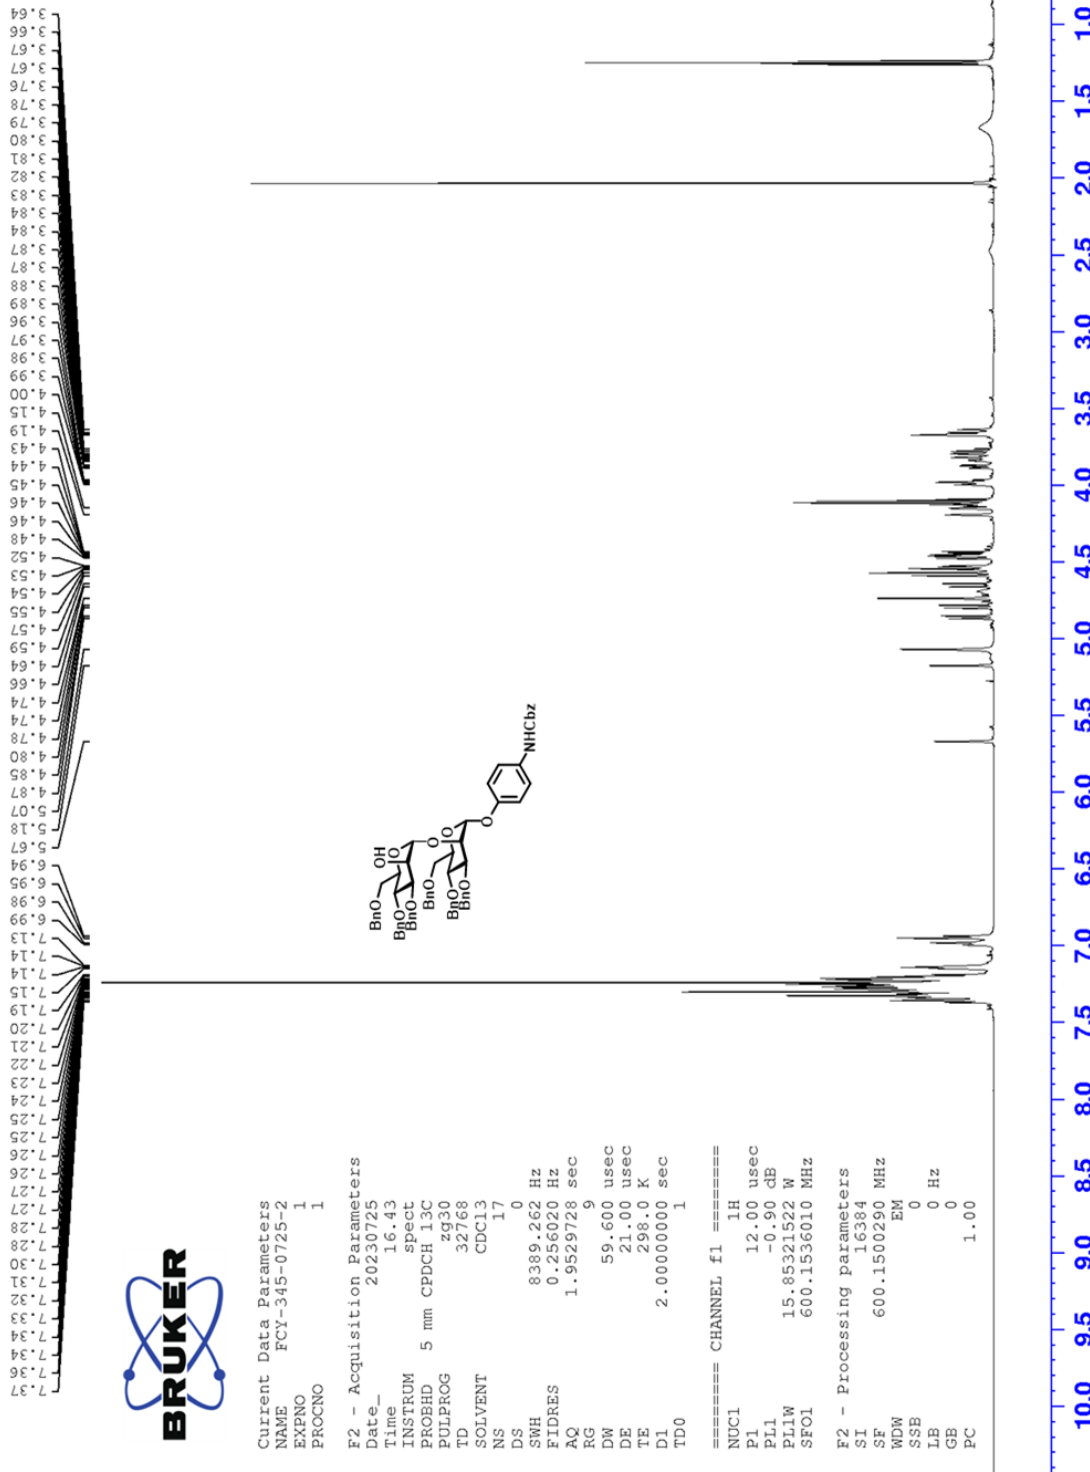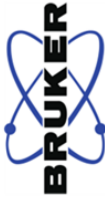

Current Data Parameters  
 NAME FCY-345-0725-2  
 EXPNO 1  
 PROCNO 1

F2 - Acquisition Parameters  
 Date\_ 20230725  
 Time 16.43  
 INSTRUM spect  
 PROBHD 5 mm CPDCH 13C  
 PULPROG zg30  
 TD 32768  
 SOLVENT CDC13  
 NS 17  
 DS 0  
 SWH 8389.262 Hz  
 FIDRES 0.256020 Hz  
 AQ 1.9529728 sec  
 RG 9  
 DW 59.600 usec  
 DE 21.00 usec  
 TE 298.0 K  
 D1 2.00000000 sec  
 TD0 1

==== CHANNEL f1 =====  
 NUC1 1H  
 P1 12.00 usec  
 PL1 -0.90 dB  
 PL1W 15.85321522 W  
 SF01 600.1536010 MHz

F2 - Processing parameters  
 SI 16384  
 SF 600.1500290 MHz  
 WDW EM  
 SSB 0  
 LB 0 Hz  
 GB 0  
 PC 1.00

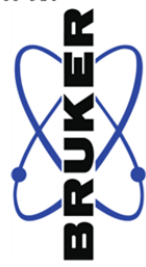

156.22  
154.70  
138.47  
138.18  
138.14  
138.05  
137.90  
136.51  
132.30  
129.74  
129.63  
128.46  
128.44  
128.31  
128.28  
128.26  
128.19  
128.06  
127.93  
127.85  
127.83  
127.74  
127.68  
127.60  
127.54  
127.46  
127.38  
127.32  
116.63  
101.12  
96.95  
79.97  
79.42  
77.21  
77.00  
76.78  
75.12  
75.02  
74.66  
74.45  
74.33  
73.23  
73.16  
72.44  
72.41  
72.16  
71.69  
68.99  
68.45  
66.57

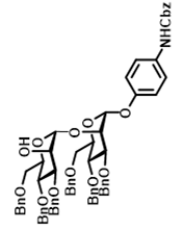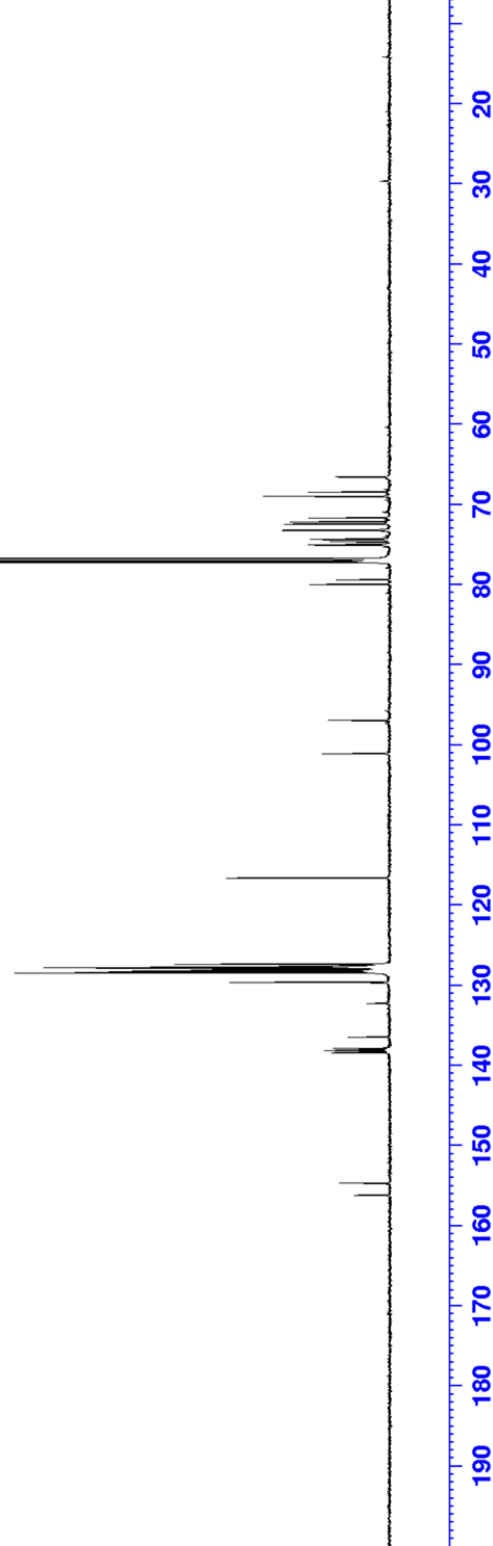

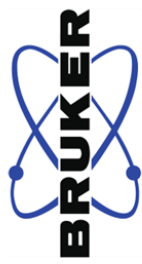

5.09  
4.81  
4.70  
3.94  
3.84  
3.81  
3.79  
3.77  
3.75  
3.68  
3.68  
3.67  
3.66  
3.64  
3.58  
3.57  
3.55  
3.50  
3.48  
3.47  
3.29  
3.27

7.04  
7.02  
6.83  
6.82

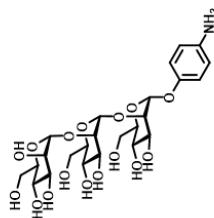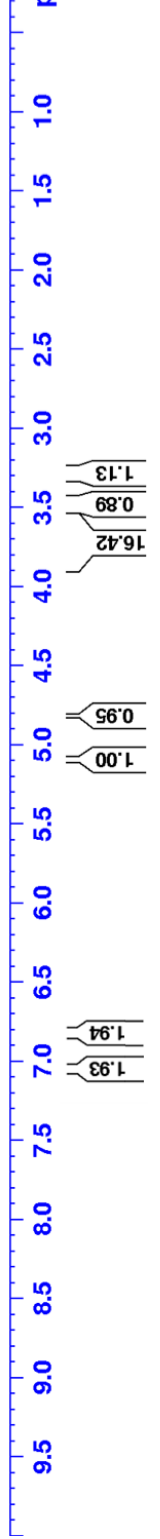

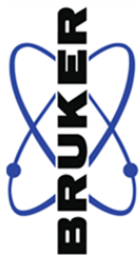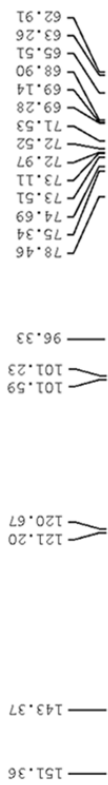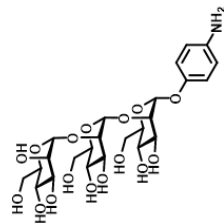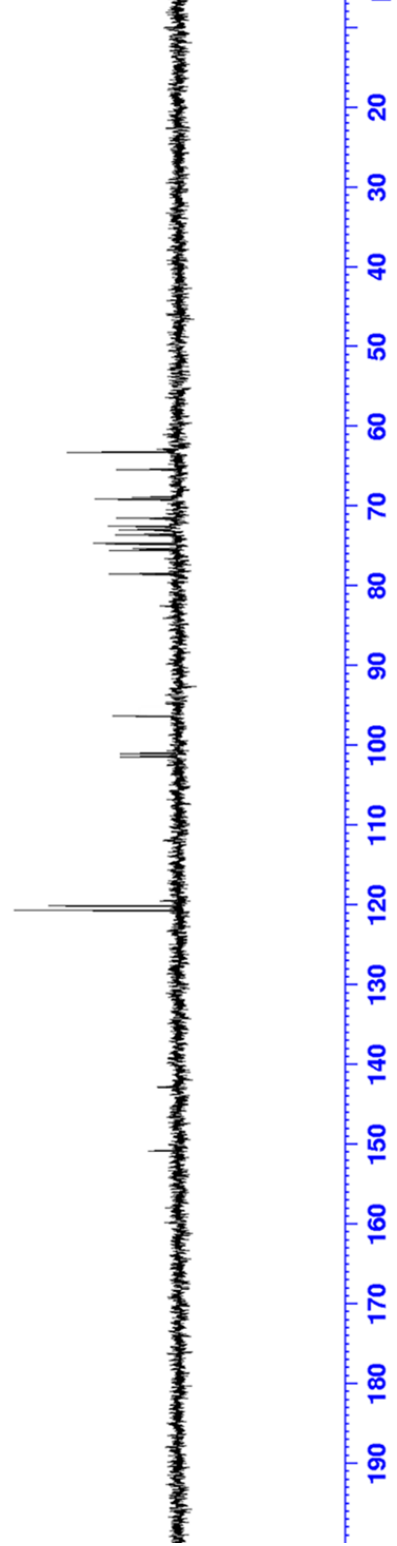





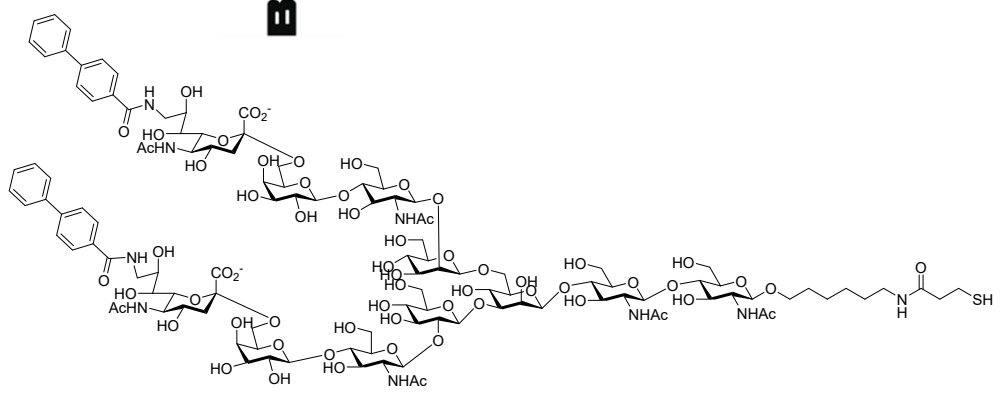

HRMS (ESI) calcd for  $[M-2H]^{2-}$ : 1383.0093, found 1383.0026.

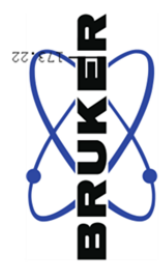

173.22

151.36

143.37

121.37  
120.59

101.20  
101.67  
97.04

79.17  
76.06  
75.40  
75.22  
74.23  
73.69  
73.23  
72.60  
72.45  
72.22  
71.68  
71.21  
69.85  
69.61  
63.97

26.08

38.52

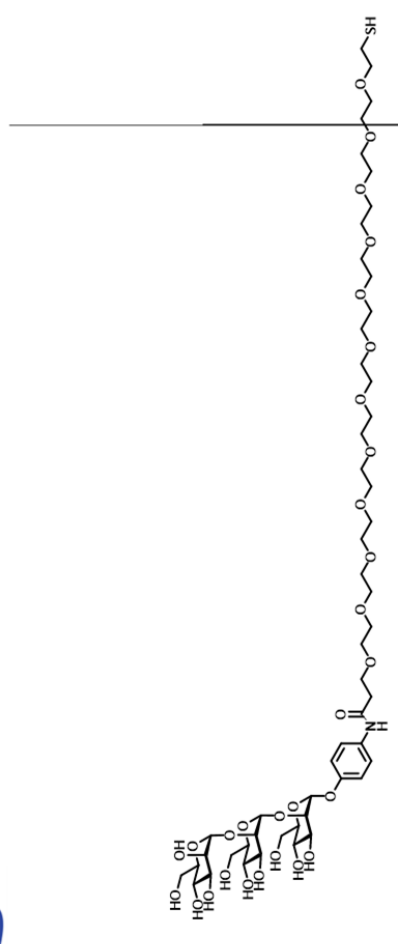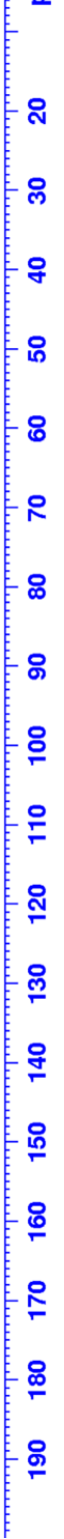

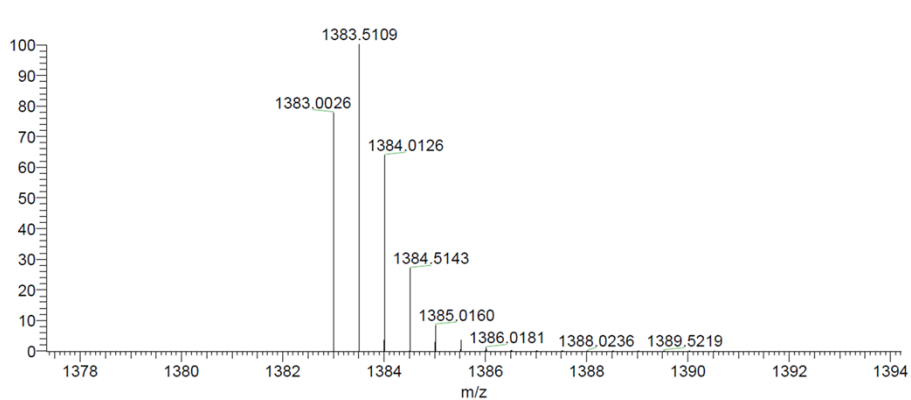

NL:  
2.76E5  
C<sub>119</sub>H<sub>173</sub>N<sub>9</sub>O<sub>63</sub>S +H:  
C<sub>119</sub>H<sub>171</sub>N<sub>9</sub>O<sub>63</sub>S<sub>1</sub>  
pa Chrg -2

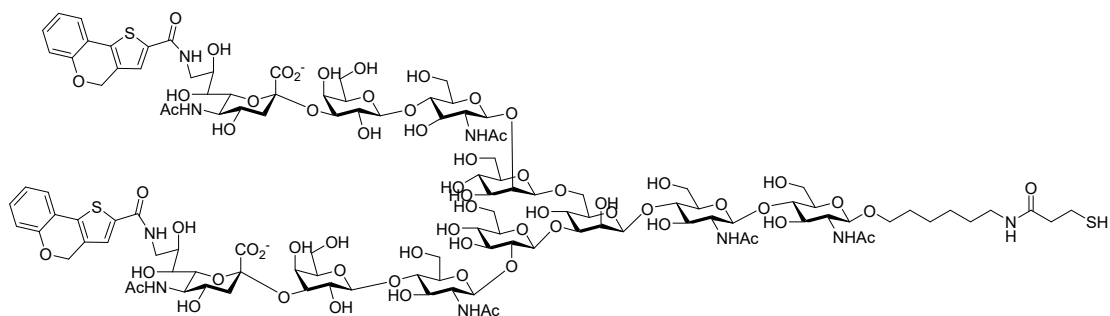

HRMS (ESI) calcd for C<sub>117</sub>H<sub>169</sub>N<sub>9</sub>O<sub>65</sub>S<sub>3</sub><sup>2-</sup> [M-2H]<sup>2-</sup>: 1416.9606, found 1416.9623.

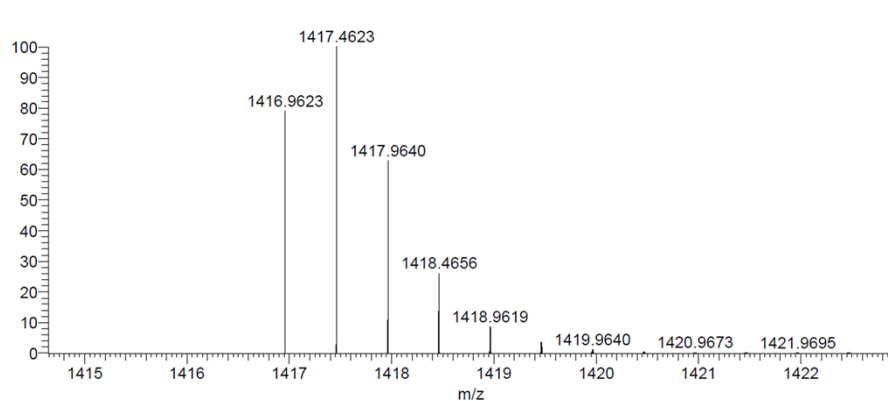

NL:  
2.49E5  
C<sub>117</sub>H<sub>169</sub>N<sub>9</sub>O<sub>65</sub>S<sub>3</sub>+H:  
C<sub>117</sub>H<sub>167</sub>N<sub>9</sub>O<sub>65</sub>S<sub>3</sub>  
pa Chrg -2

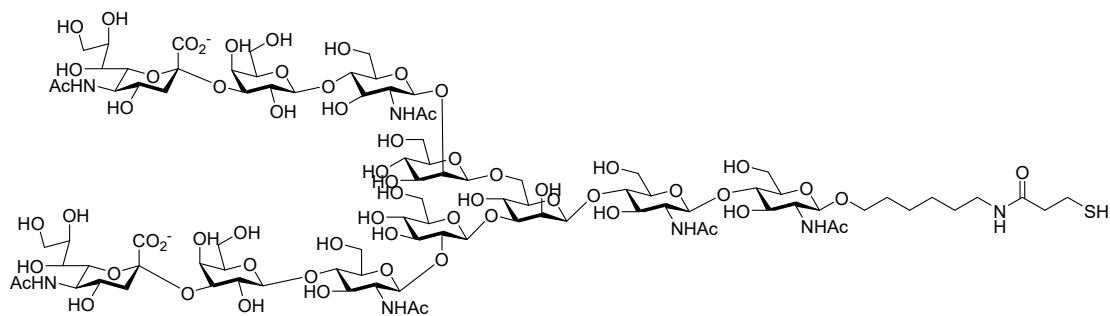

HRMS (ESI) calcd for C<sub>93</sub>H<sub>153</sub>N<sub>7</sub>O<sub>63</sub>S<sup>2-</sup> [M-2H]<sup>2-</sup>: 1203.9357, found 1203.9367.

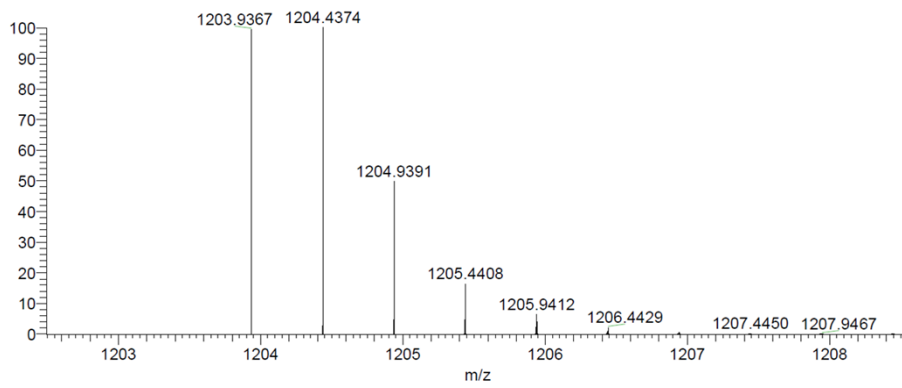

NL:  
2.88E5  
C<sub>93</sub> H<sub>155</sub> N<sub>7</sub> O<sub>63</sub> S +H:  
C<sub>93</sub> H<sub>153</sub> N<sub>7</sub> O<sub>63</sub> S<sub>1</sub>  
pa Chrg -2

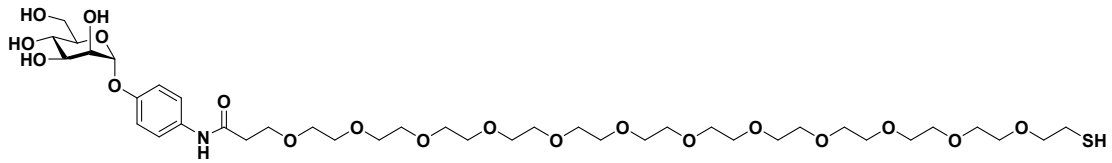

HRMS (ESI) calcd for  $[M+H]^+$ : 888.4263, found 888.4257.

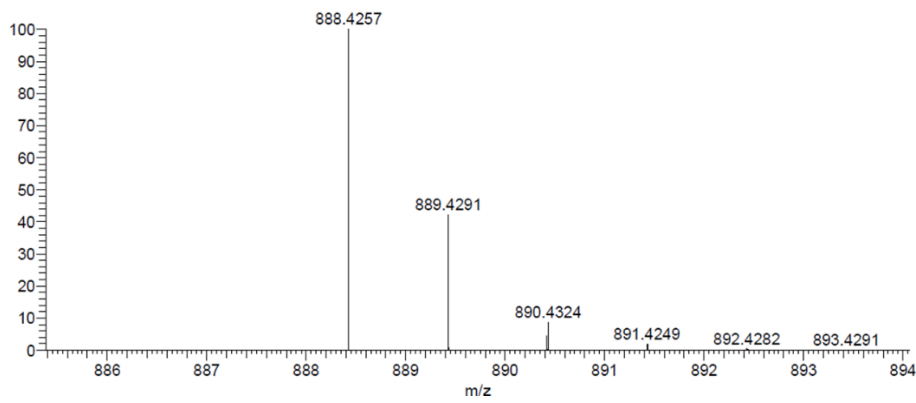

NL:  
5.89E5  
C<sub>39</sub> H<sub>69</sub> NO<sub>19</sub> S +H:  
C<sub>39</sub> H<sub>70</sub> N<sub>1</sub> O<sub>19</sub> S<sub>1</sub>  
pa Chrg 1

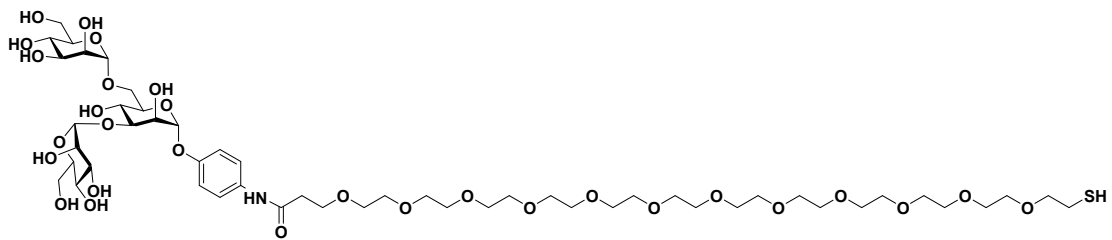

HRMS (ESI) calcd for  $[M+Na]^+$ : 1234.5139, found 1234.5133.

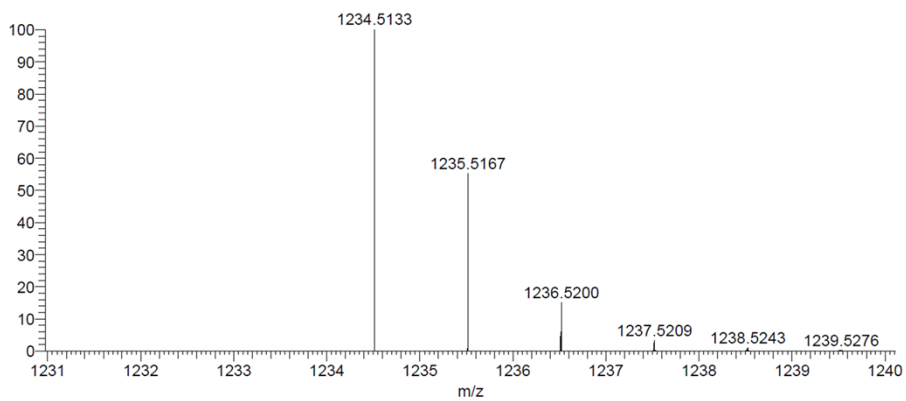

NL:  
5.04E5  
C<sub>51</sub>H<sub>89</sub>NO<sub>29</sub>S +Na:  
C<sub>51</sub>H<sub>89</sub>N<sub>1</sub>O<sub>29</sub>S<sub>1</sub>Na<sub>1</sub>  
pa Chrg 1

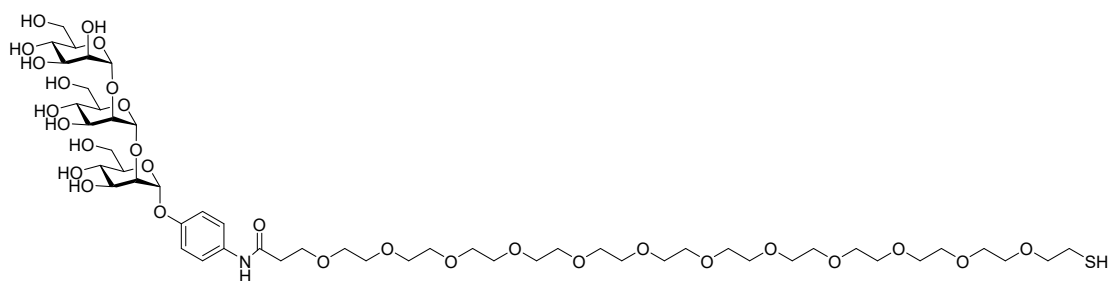

HRMS (ESI) calcd for  $[M+H]^+$ : 1212.5319, found 1212.5314.

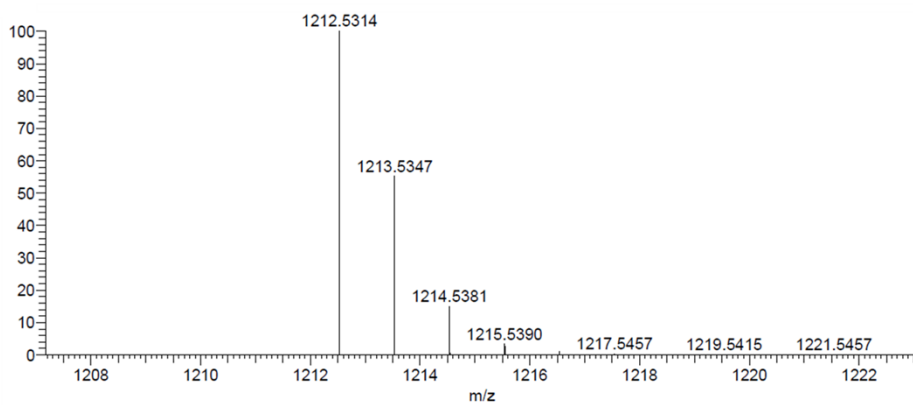

NL:  
5.04E5  
C<sub>51</sub>H<sub>89</sub>NO<sub>29</sub>S +H:  
C<sub>51</sub>H<sub>90</sub>N<sub>1</sub>O<sub>29</sub>S<sub>1</sub>  
pa Chrg 1
